# Supplementary material for: The nematode worm C. elegans chooses between bacterial foods as if maximizing economic utility
Source: eLife. 2023 Apr 25;12:e69779. doi: 10.7554/eLife.69779 (PMC10231927; doi:10.7554/eLife.69779)
Supplement: Figure 2—source data 1. [file elife-69779-fig2-data1.xlsx]

## Sheet: Panel B
Untrained means	Trained means	Untrained CI	Trained CI
0.43	0.64375	0.102986	0.182463
0.26875	0.37	0.183835	0.203781

## Sheet: Panel C
Time (min)	Mean Azide- Trained	Mean Azide- Untrained	Mean Azide+ Trained	Mean Azide+ Untrained	CI Azide- Trained	CI Azide- Untrained	CI Azide+ Trained	CI Azide+ Untrained
0	0	0	0	0	0	0	0	0
10	0.303289	0.272463	0.295265	0.102454	0.0875367	0.106342	0.122315	0.120565
20	0.367382	0.269614	0.292605	0.127118	0.107197	0.0761946	0.110826	0.0905165
30	0.46814	0.343477	0.327745	0.106214	0.0937907	0.0612622	0.11501	0.0889591
40	0.589157	0.397587	0.327745	0.113943	0.109984	0.0575912	0.11501	0.0805744
50	0.699297	0.464687	0.327745	0.116069	0.122714	0.0607343	0.11501	0.0838171
60	0.744876	0.564824	0.327745	0.116069	0.119196	0.0798278	0.11501	0.0838171

## Sheet: Panel D
Time (min)	Mean N2 Trained	Mean N2 Untrained	Mean cat-2 Trained	Mean cat-2 Untrained	CI N2 Trained	CI N2 Untrained	CI cat-2 Trained	CI cat-2 Untrained
0	0	0	0	0	0	0	0	0
10	0.303289	0.272463	0.00870485	0.0121295	0.0875367	0.106342	0.115139	0.107732
20	0.367382	0.269614	0.0874753	0.128796	0.107197	0.0761946	0.114803	0.0952281
30	0.46814	0.343477	0.081663	0.189215	0.0937907	0.0612622	0.107874	0.112601
40	0.589157	0.397587	0.124868	0.218678	0.109984	0.0575912	0.110224	0.0927261
50	0.699297	0.464687	0.152109	0.215333	0.122714	0.0607343	0.116287	0.107852
60	0.744876	0.564824	0.204177	0.237796	0.119196	0.0798278	0.0963655	0.0926312
