# Supplementary material for: The nematode worm C. elegans chooses between bacterial foods as if maximizing economic utility
Source: eLife. 2023 Apr 25;12:e69779. doi: 10.7554/eLife.69779 (PMC10231927; doi:10.7554/eLife.69779)
Supplement: Figure 2—source data 2. [file elife-69779-fig2-data2.xlsx]

## Sheet: Sheet1
Labels	Mean	SEM
N2	0.911245	0.0228451
\f02cat-2(n4547)	0.941431	0.0219988
\f02cat-2(e1112)	0.956369	0.0234275
