# Supplementary material for: The nematode worm C. elegans chooses between bacterial foods as if maximizing economic utility
Source: eLife. 2023 Apr 25;12:e69779. doi: 10.7554/eLife.69779 (PMC10231927; doi:10.7554/eLife.69779)
Supplement: Figure 4—source data 1. [file elife-69779-fig4-data1.xlsx]

## Sheet: Panel A
	Mean H Trainees	Mean M Trainees	CI H Trainees	CI M Trainees
Familiar	1.1	1.05	0.471853	0.665476
Unfamiliar	0.01	0.38	0.0555289	0.308138

## Sheet: Panel B
	Mean	CI
Untrained	0.602444	0.0491589
Trained	0.700895	0.0492951

## Sheet: Panel C
Time (sec)	Mean 0.01	Mean 0.03	Mean 1.0	Mean 3.0	SEM 0.01	SEM 0.03	SEM 1.0	SEM 3.0
-120	0.466667	0.380952	0	0.153846	0.133333	0.12866	0	0.104154
-119	0.466667	0.31746	0	0.153846	0.215289	0.0812475	0	0.081084
-118	0.32	0.2	0	0.0923077	0.154673	0.0478091	0	0.0486504
-117	0.228571	0.156463	0	0.0659341	0.110481	0.0393148	0	0.0347503
-116	0.177778	0.132275	0	0.0512821	0.0859296	0.0348163	0	0.027028
-115	0.145455	0.116883	0	0.041958	0.070306	0.0355664	0	0.0221138
-114	0.123077	0.106227	0	0.035503	0.0594897	0.0311678	0	0.0187117
-113	0.111111	0.101587	0	0.0410256	0.0510904	0.0303835	0	0.0177646
-112	0.101961	0.0980392	0	0.0452489	0.044639	0.0282205	0	0.0190189
-111	0.115789	0.0877193	0	0.0445344	0.0605998	0.0252499	0	0.0166927
-110	0.0982456	0.0676692	0	0.0364372	0.0686936	0.0227229	0	0.015058
-109	0.0666667	0.0451128	0	0.0242915	0.0519928	0.0206368	0	0.00963756
-108	0.0491228	0.047619	0	0.0202429	0.0346337	0.0201906	0	0.00949477
-107	0.045614	0.047619	0	0.0202429	0.0311866	0.0205147	0	0.00949477
-106	0.0385965	0.047619	0	0.0202429	0.0278816	0.0205147	0	0.00949477
-105	0.0385965	0.0451128	0	0.0202429	0.0278816	0.0206368	0	0.00949477
-104	0.0491228	0.0451128	0	0.0202429	0.0382532	0.0206368	0	0.00949477
-103	0.0526316	0.0451128	0	0.0202429	0.0417276	0.0218778	0	0.00949477
-102	0.0526316	0.0451128	0	0.0202429	0.0417276	0.0215743	0	0.00949477
-101	0.0526316	0.0426065	0.00404858	0.0202429	0.0417276	0.0200971	0.00404858	0.00949477
-100	0.0526316	0.0426065	0.00404858	0.0202429	0.0417276	0.0200971	0.00404858	0.00949477
-99	0.0526316	0.0426065	0.00404858	0.0202429	0.0417276	0.0200971	0.00404858	0.00949477
-98	0.0526316	0.037594	0.00404858	0.0202429	0.0417276	0.0192673	0.00404858	0.00949477
-97	0.0491228	0.037594	0.00404858	0.0202429	0.0418749	0.0192673	0.00404858	0.00949477
-96	0.0491228	0.0300752	0.00404858	0.0121457	0.0418749	0.0156516	0.00404858	0.00874594
-95	0.0491228	0.0250627	0.00404858	0.0121457	0.0418749	0.0156717	0.00404858	0.00874594
-94	0.045614	0.0250627	0.00404858	0.00404858	0.0420007	0.0172732	0.00404858	0.00404858
-93	0.0631579	0.0250627	0.00404858	0.00404858	0.0631579	0.0172732	0.00404858	0.00404858
-92	0.045614	0.0275689	0.00404858	0	0.045614	0.0190872	0.00404858	0
-91	0.0385965	0.0275689	0.00404858	0.00404858	0.0385965	0.0190872	0.00404858	0.00404858
-90	0.0385965	0.0275689	0.00404858	0.00809717	0.0385965	0.0172732	0.00404858	0.00548181
-89	0.0421053	0.0225564	0.00404858	0.00809717	0.0421053	0.0123546	0.00404858	0.00548181
-88	0.0421053	0.0200501	0.00404858	0.00809717	0.0421053	0.0111803	0.00404858	0.00548181
-87	0.0421053	0.0225564	0.00404858	0.00809717	0.0421053	0.0133798	0.00404858	0.00548181
-86	0.0421053	0.0250627	0.00404858	0.00809717	0.0421053	0.0134033	0.00404858	0.00548181
-85	0.0350877	0.0250627	0.00404858	0.00809717	0.0350877	0.0134033	0.00404858	0.00548181
-84	0.0315789	0.0225564	0.00404858	0.00809717	0.0315789	0.0112363	0.00404858	0.00548181
-83	0.0315789	0.0200501	0.00404858	0.00809717	0.0315789	0.0105739	0.00404858	0.00548181
-82	0.0315789	0.0225564	0	0.00809717	0.0315789	0.0128774	0	0.00548181
-81	0.0315789	0.0275689	0	0.00809717	0.0315789	0.0156717	0	0.00548181
-80	0.0315789	0.0275689	0	0.00809717	0.0315789	0.0156717	0	0.00548181
-79	0.0315789	0.0300752	0	0.00809717	0.0315789	0.0180033	0	0.00548181
-78	0.0315789	0.0350877	0	0.00809717	0.0315789	0.0209689	0	0.00548181
-77	0.0350877	0.0426065	0	0.00809717	0.0315232	0.0242603	0	0.00548181
-76	0.0350877	0.0501253	0	0.00809717	0.0315232	0.0282442	0	0.00548181
-75	0.045614	0.0526316	0	0.00809717	0.0420007	0.0303869	0	0.00548181
-74	0.045614	0.0626566	0	0.00809717	0.0420007	0.0369706	0	0.00548181
-73	0.0526316	0.0676692	0	0.00809717	0.0489973	0.0433011	0	0.00548181
-72	0.0526316	0.0726817	0	0.00404858	0.0489973	0.0457213	0	0.00404858
-71	0.0526316	0.075188	0	0.00809717	0.0489973	0.0506613	0	0.00809717
-70	0.0491228	0.0776942	0	0.0121457	0.0454982	0.0511855	0	0.00874594
-69	0.0491228	0.0776942	0	0.0121457	0.0454982	0.0511855	0	0.00874594
-68	0.0491228	0.0802005	0	0.0121457	0.0454982	0.0535778	0	0.00874594
-67	0.0491228	0.075188	0	0.0121457	0.0454982	0.0513081	0	0.00874594
-66	0.045614	0.0776942	0	0.0121457	0.0420007	0.0511855	0	0.00874594
-65	0.0491228	0.0776942	0	0.0121457	0.0418749	0.0511855	0	0.00874594
-64	0.0491228	0.0802005	0	0.0161943	0.0418749	0.0510565	0	0.00920255
-63	0.0491228	0.0776942	0	0.0202429	0.0418749	0.0486758	0	0.01121
-62	0.0491228	0.0726817	0	0.0242915	0.0418749	0.0433519	0	0.0113312
-61	0.0491228	0.0726817	0	0.0242915	0.0418749	0.0433519	0	0.0113312
-60	0.0491228	0.0701754	0	0.0242915	0.0418749	0.0409834	0	0.0113312
-59	0.0491228	0.0651629	0	0.0283401	0.0418749	0.0382483	0	0.0141218
-58	0.045614	0.0576441	0.0104594	0.0283401	0.0420007	0.0380754	0.0104594	0.0141218
-57	0.045614	0.0501253	0.0244571	0.0283401	0.0420007	0.0333813	0.0169061	0.0141218
-56	0.0350877	0.0451128	0.0244571	0.0283401	0.0315232	0.0286636	0.0169061	0.0141218
-55	0.0140351	0.037594	0.0244571	0.0283401	0.0108553	0.0232961	0.0169061	0.0141218
-54	0.00350877	0.0325815	0.0244571	0.0283401	0.00350877	0.0164347	0.0169061	0.0141218
-53	0.0105263	0.0275689	0.0244571	0.0283401	0.00761839	0.0134033	0.0169061	0.0141218
-52	0.0280702	0.0225564	0.0244571	0.0202429	0.0245614	0.00931036	0.0169061	0.0126956
-51	0.045614	0.0175439	0.0244571	0.0161943	0.0420007	0.00838757	0.0169061	0.0124786
-50	0.045614	0.0175439	0.0244571	0.0202429	0.0420007	0.00838757	0.0169061	0.0126956
-49	0.045614	0.0150376	0.0244571	0.0202429	0.0420007	0.00531659	0.0169061	0.0126956
-48	0.045614	0.0150376	0.0244571	0.0202429	0.0420007	0.00531659	0.0169061	0.0126956
-47	0.045614	0.0150376	0.0244571	0.0242915	0.0420007	0.00643871	0.0169061	0.0128027
-46	0.0421053	0.0175439	0.0244571	0.0242915	0.0421053	0.00663096	0.0169061	0.0128027
-45	0.0421053	0.0150376	0.0244571	0.0202429	0.0421053	0.00643871	0.0169061	0.00949477
-44	0.0421053	0.0175439	0.0244571	0.0161943	0.0421053	0.00756045	0.0169061	0.00701235
-43	0.0421053	0.0150376	0.0244571	0.0121457	0.0421053	0.00739242	0.0169061	0.00640137
-42	0.0421053	0.0150376	0.0244571	0.0161943	0.0421053	0.00739242	0.0169061	0.00920255
-41	0.0421053	0.0200501	0.0244571	0.0161943	0.0421053	0.00768407	0.0169061	0.00920255
-40	0.0421053	0.0200501	0.0244571	0.0161943	0.0421053	0.00768407	0.0169061	0.00920255
-39	0.0421053	0.0200501	0.0139978	0.0161943	0.0421053	0.00768407	0.0139978	0.00920255
-38	0.0421053	0.0200501	0	0.0161943	0.0421053	0.00768407	0	0.00920255
-37	0.0421053	0.0200501	0	0.0242915	0.0421053	0.00768407	0	0.0128027
-36	0.0421053	0.0175439	0	0.0242915	0.0421053	0.00663096	0	0.0128027
-35	0.0421053	0.0175439	0	0.0283401	0.0421053	0.00838757	0	0.0164454
-34	0.0350877	0.0175439	0	0.0323887	0.0350877	0.00838757	0	0.0202429
-33	0.0175439	0.0225564	0	0.0323887	0.0175439	0.00931036	0	0.0202429
-32	0.00350877	0.0225564	0	0.0323887	0.00350877	0.00931036	0	0.0202429
-31	0.0245614	0.0225564	0	0.0283401	0.0210944	0.00931036	0	0.0203103
-30	0.045614	0.0200501	0	0.0283401	0.038733	0.00768407	0	0.0203103
-29	0.045614	0.0200501	0.0101215	0.0283401	0.038733	0.00768407	0.0101215	0.0203103
-28	0.0491228	0.0200501	0.0101215	0.0242915	0.0392741	0.00768407	0.0101215	0.0203103
-27	0.0491228	0.0175439	0.0101215	0.0242915	0.0392741	0.00663096	0.0101215	0.0203103
-26	0.0491228	0.0225564	0.0101215	0.0242915	0.0392741	0.00776538	0.0101215	0.0203103
-25	0.0526316	0.0250627	0.0101215	0.0242915	0.039117	0.00860931	0.0101215	0.0203103
-24	0.0526316	0.0300752	0.0101215	0.0242915	0.039117	0.00857275	0.0101215	0.0203103
-23	0.0526316	0.0325815	0.0101215	0.0202429	0.039117	0.00924265	0.0101215	0.0163622
-22	0.0526316	0.0325815	0.0101215	0.0202429	0.039117	0.0105739	0.0101215	0.0163622
-21	0.0526316	0.0350877	0.0101215	0.0161943	0.039117	0.0122269	0.0101215	0.0124786
-20	0.0526316	0.0350877	0.0101215	0.0161943	0.039117	0.0122269	0.0101215	0.0124786
-19	0.0526316	0.0401002	0.0101215	0.0161943	0.039117	0.0144844	0.0101215	0.0124786
-18	0.0526316	0.0426065	0.0101215	0.00809717	0.039117	0.0164919	0.0101215	0.00809717
-17	0.0526316	0.0426065	0.0101215	0.00809717	0.039117	0.0164919	0.0101215	0.00809717
-16	0.0526316	0.0426065	0.0101215	0.00404858	0.039117	0.0164919	0.0101215	0.00404858
-15	0.0526316	0.0426065	0.0101215	0.00404858	0.039117	0.0164919	0.0101215	0.00404858
-14	0.0526316	0.037594	0.0242394	0.00404858	0.039117	0.0163004	0.0168139	0.00404858
-13	0.0491228	0.0401002	0.0382371	0.00404858	0.035758	0.0162037	0.0271229	0.00404858
-12	0.0280702	0.0451128	0.0417366	0.00404858	0.018424	0.0189716	0.0289042	0.00404858
-11	0.0245614	0.0526316	0.0417366	0.00809717	0.0176936	0.0223887	0.0289042	0.00548181
-10	0.0421053	0.0576441	0.0316151	0.00809717	0.0349118	0.0256571	0.0217584	0.00548181
-9	0.0491228	0.0576441	0.0316151	0.0121457	0.0382532	0.0253988	0.0217584	0.00640137
-8	0.0491228	0.0601504	0.0316151	0.0121457	0.0382532	0.0254975	0.0217584	0.00640137
-7	0.0491228	0.0551378	0.044617	0.0121457	0.0382532	0.0239476	0.0328074	0.00640137
-6	0.0491228	0.0551378	0.0575169	0.0121457	0.0382532	0.0210138	0.0448177	0.00640137
-5	0.0526316	0.0526316	0.0685369	0.0121457	0.0384367	0.0223887	0.0553955	0.00640137
-4	0.0526316	0.0526316	0.0685369	0.0121457	0.0384367	0.0223887	0.0553955	0.00640137
-3	0.0526316	0.0601504	0.0938298	0.0161943	0.0384367	0.026262	0.0690815	0.00701235
-2	0.0561404	0.0626566	0.0938298	0.0161943	0.0389368	0.0282775	0.0690815	0.00701235
-1	0.0596491	0.0802005	0.106266	0.0161943	0.0397415	0.0358843	0.0811819	0.00701235
0	0.0596491	0.0877193	0.117034	0.0242915	0.0397415	0.0404977	0.091731	0.00963756
1	0.0631579	0.0977444	0.129577	0.0404858	0.0408329	0.0459816	0.104076	0.0207757
2	0.0631579	0.115288	0.139683	0.0526316	0.0408329	0.0553936	0.103728	0.0291947
3	0.0631579	0.120301	0.139683	0.0688259	0.0408329	0.0602443	0.103728	0.04435
4	0.0631579	0.122807	0.152026	0.0809717	0.0408329	0.061885	0.115882	0.0597766
5	0.0631579	0.132832	0.149145	0.097166	0.0408329	0.0669318	0.113041	0.0758141
6	0.0666667	0.137845	0.148939	0.121457	0.0421887	0.0727724	0.12698	0.0959779
7	0.0666667	0.145363	0.15967	0.1417	0.0421887	0.0761756	0.137646	0.116075
8	0.0631579	0.14787	0.173717	0.161943	0.0391844	0.0786225	0.151622	0.136215
9	0.0666667	0.150376	0.177905	0.182186	0.0421887	0.082684	0.155791	0.156382
10	0.0561404	0.152882	0.187904	0.198381	0.0396085	0.0869317	0.15535	0.176899
11	0.0561404	0.16792	0.201048	0.222672	0.0396085	0.0970219	0.168424	0.192659
12	0.0561404	0.180451	0.195381	0.255061	0.0396085	0.105236	0.155576	0.212779
13	0.0526316	0.18797	0.199127	0.271255	0.0380919	0.114193	0.155864	0.228861
14	0.0491228	0.203008	0.216145	0.299595	0.0368481	0.122804	0.159699	0.25704
15	0.0491228	0.218045	0.23406	0.323887	0.0368481	0.131518	0.170223	0.281219
16	0.0491228	0.213033	0.208767	0.340081	0.0368481	0.128175	0.15733	0.301441
17	0.0491228	0.218045	0.222824	0.356275	0.035758	0.132418	0.170861	0.313258
18	0.045614	0.218045	0.225008	0.384615	0.0351628	0.134738	0.17297	0.337132
19	0.045614	0.215539	0.23742	0.408907	0.0351628	0.132598	0.176631	0.356972
20	0.0421053	0.20802	0.250761	0.408907	0.0349118	0.126257	0.180816	0.361274
21	0.0421053	0.203008	0.267622	0.425101	0.0349118	0.121509	0.197693	0.377442
22	0.0421053	0.205514	0.289594	0.437247	0.0349118	0.122354	0.210678	0.385215
23	0.0421053	0.213033	0.308723	0.449393	0.0349118	0.126882	0.213279	0.393029
24	0.0421053	0.223058	0.309558	0.469636	0.0349118	0.131449	0.209478	0.400363
25	0.0385965	0.230576	0.31775	0.502024	0.0350125	0.136547	0.213609	0.404298
26	0.0561404	0.233083	0.316164	0.518219	0.0524977	0.142183	0.212337	0.399759
27	0.0631579	0.235589	0.307792	0.510121	0.0560777	0.147468	0.204587	0.396124
28	0.0421053	0.238095	0.325833	0.526316	0.0352877	0.151614	0.217001	0.404139
29	0.0421053	0.250627	0.334845	0.534413	0.0352877	0.159718	0.224917	0.400469
30	0.0421053	0.24812	0.346881	0.550607	0.0352877	0.156937	0.22338	0.404034
31	0.0421053	0.24812	0.350567	0.546559	0.0352877	0.161616	0.228074	0.396981
32	0.0421053	0.253133	0.360293	0.57085	0.0352877	0.162612	0.228192	0.405886
33	0.045614	0.24812	0.353442	0.578947	0.0359053	0.162552	0.220713	0.399677
34	0.045614	0.243108	0.357384	0.591093	0.0359053	0.161671	0.219768	0.394451
35	0.0491228	0.250627	0.36148	0.615385	0.0368481	0.165995	0.223286	0.396258
36	0.0491228	0.255639	0.35772	0.651822	0.0368481	0.168025	0.210482	0.404777
37	0.0491228	0.250627	0.376702	0.684211	0.0368481	0.168558	0.208986	0.413048
38	0.0491228	0.260652	0.37519	0.688259	0.0368481	0.171836	0.203565	0.404423
39	0.0491228	0.270677	0.371016	0.708502	0.0368481	0.178567	0.198873	0.41066
40	0.0491228	0.273183	0.364962	0.732794	0.0368481	0.181909	0.191196	0.409701
41	0.0491228	0.275689	0.351038	0.753036	0.0368481	0.184189	0.180289	0.412419
42	0.0491228	0.275689	0.348152	0.773279	0.0368481	0.184189	0.182903	0.416873
43	0.0561404	0.273183	0.357068	0.785425	0.0399402	0.186704	0.194651	0.414484
44	0.0807018	0.273183	0.362937	0.785425	0.063505	0.185925	0.196526	0.409701
45	0.077193	0.270677	0.37164	0.801619	0.0573951	0.182909	0.199531	0.409818
46	0.0596491	0.273183	0.387238	0.842105	0.0410477	0.184	0.213895	0.424078
47	0.0666667	0.283208	0.386552	0.870445	0.0440248	0.187545	0.215677	0.42053
48	0.0736842	0.278195	0.394975	0.88664	0.0478533	0.182	0.216644	0.421468
49	0.077193	0.275689	0.391865	0.902834	0.0500275	0.182968	0.225704	0.422772
50	0.0807018	0.278195	0.400178	0.935223	0.0523468	0.182326	0.22967	0.431391
51	0.0842105	0.273183	0.40207	0.951417	0.0547927	0.183174	0.234297	0.432349
52	0.0842105	0.280702	0.387802	0.983806	0.0547927	0.184276	0.228767	0.436027
53	0.0842105	0.278195	0.373206	1.01215	0.0547927	0.183372	0.224558	0.442285
54	0.0807018	0.283208	0.385869	1.02024	0.0523468	0.184567	0.232484	0.440087
55	0.077193	0.285714	0.409038	1.03644	0.0500275	0.187584	0.240358	0.437977
56	0.077193	0.288221	0.379309	1.04049	0.0500275	0.186103	0.225065	0.433116
57	0.077193	0.288221	0.383601	1.07287	0.0500275	0.188252	0.221976	0.437009
58	0.0807018	0.285714	0.382119	1.12551	0.0497631	0.186632	0.210542	0.446257
59	0.0842105	0.290727	0.397264	1.15789	0.0497454	0.187866	0.21551	0.453028
60	0.0842105	0.300752	0.403873	1.19433	0.0497454	0.189423	0.2167	0.458885
61	0.0877193	0.305764	0.417265	1.23077	0.0522963	0.19193	0.218601	0.464735
62	0.101754	0.305764	0.428994	1.25911	0.0654687	0.192376	0.222052	0.473176
63	0.0947368	0.313283	0.452672	1.28745	0.0595015	0.193261	0.222568	0.48074
64	0.0877193	0.320802	0.470248	1.33198	0.0552403	0.19716	0.2234	0.48977
65	0.0842105	0.330827	0.493341	1.36842	0.0525814	0.19807	0.226017	0.498132
66	0.0842105	0.328321	0.533724	1.39676	0.0525814	0.194872	0.231907	0.510338
67	0.0807018	0.343358	0.548922	1.45749	0.0500275	0.200468	0.233909	0.529423
68	0.0807018	0.358396	0.580858	1.48988	0.0500275	0.205729	0.23791	0.539227
69	0.0842105	0.370927	0.601808	1.53036	0.05233	0.210541	0.244239	0.551408
70	0.0842105	0.388471	0.597942	1.5749	0.05233	0.211604	0.240378	0.562471
71	0.0842105	0.398496	0.639004	1.61134	0.050273	0.212664	0.254086	0.574592
72	0.0877193	0.418546	0.664777	1.65182	0.052548	0.219768	0.264198	0.586066
73	0.0912281	0.431078	0.680733	1.69231	0.054953	0.223699	0.272182	0.599051
74	0.0947368	0.446115	0.697594	1.7247	0.0574717	0.227383	0.279146	0.615551
75	0.108772	0.461153	0.743747	1.75709	0.0668642	0.231331	0.300702	0.627023
76	0.129825	0.468672	0.755921	1.79352	0.081028	0.23329	0.307229	0.639249
77	0.140351	0.493734	0.772505	1.81377	0.0905314	0.239968	0.317171	0.643544
78	0.140351	0.501253	0.780686	1.83806	0.0903855	0.242024	0.317374	0.648926
79	0.147368	0.513784	0.814392	1.85425	0.0950149	0.247128	0.331988	0.654503
80	0.147368	0.528822	0.829746	1.88259	0.0951536	0.25378	0.336232	0.66676
81	0.136842	0.536341	0.842086	1.89474	0.0896725	0.256266	0.334746	0.674698
82	0.133333	0.531328	0.832184	1.92713	0.0908514	0.255578	0.325089	0.6787
83	0.129825	0.528822	0.838434	1.94737	0.0877494	0.253468	0.329287	0.689433
84	0.136842	0.526316	0.864885	1.95547	0.093982	0.250866	0.329282	0.691281
85	0.140351	0.533835	0.866268	1.9919	0.0971384	0.252446	0.328245	0.69594
86	0.147368	0.54386	0.876882	1.99595	0.10002	0.254217	0.329853	0.697256
87	0.150877	0.553885	0.89201	2.02024	0.103222	0.25495	0.334557	0.709902
88	0.157895	0.566416	0.899328	2.03644	0.105763	0.256839	0.337101	0.710998
89	0.178947	0.571429	0.933641	2.04858	0.11563	0.257951	0.350597	0.718478
90	0.178947	0.581454	0.945257	2.06478	0.118781	0.258645	0.354941	0.719286
91	0.178947	0.586466	0.973402	2.07692	0.118781	0.257567	0.366227	0.717567
92	0.178947	0.593985	0.99468	2.10931	0.118781	0.257614	0.369825	0.711799
93	0.178947	0.598997	0.998629	2.12955	0.118781	0.256159	0.363834	0.703244
94	0.164912	0.609023	1.00852	2.15385	0.109425	0.255182	0.360709	0.69774
95	0.157895	0.616541	1.01945	2.17814	0.1092	0.253537	0.362417	0.689936
96	0.150877	0.621554	1.04039	2.18219	0.10674	0.252976	0.362646	0.6798
97	0.147368	0.62406	1.05177	2.21457	0.107028	0.25255	0.365171	0.684741
98	0.150877	0.631579	1.06206	2.23077	0.110265	0.253012	0.361126	0.679824
99	0.157895	0.636591	1.04595	2.25101	0.116788	0.25207	0.361158	0.677984
100	0.157895	0.654135	1.0814	2.2753	0.119136	0.257215	0.365967	0.677538
101	0.154386	0.676692	1.112	2.29555	0.118299	0.263441	0.376873	0.682145
102	0.161404	0.711779	1.10701	2.31174	0.121381	0.273762	0.377388	0.682716
103	0.175439	0.724311	1.09662	2.35223	0.127342	0.276597	0.37577	0.690987
104	0.2	0.75188	1.08451	2.34413	0.131172	0.283921	0.371385	0.685186
105	0.210526	0.744361	1.09213	2.37652	0.139345	0.279688	0.373645	0.682127
106	0.214035	0.75188	1.07166	2.39676	0.142292	0.280697	0.365085	0.67967
107	0.203509	0.754386	1.07194	2.39676	0.137618	0.282645	0.363254	0.676475
108	0.189474	0.759399	1.07065	2.40891	0.136938	0.282721	0.36232	0.670875
109	0.196491	0.761905	1.06723	2.4332	0.143584	0.281623	0.362026	0.670875
110	0.2	0.759399	1.05392	2.4413	0.14692	0.279837	0.36138	0.66802
111	0.207018	0.746867	1.06451	2.46559	0.153615	0.275706	0.354443	0.672875
112	0.210526	0.749373	1.07	2.48988	0.156973	0.274611	0.355826	0.677151
113	0.221053	0.739348	1.06598	2.49393	0.167084	0.273927	0.354078	0.681103
114	0.214035	0.734336	1.06895	2.49393	0.16303	0.27436	0.354145	0.684691
115	0.217544	0.724311	1.06428	2.50607	0.166425	0.271422	0.357705	0.688957
116	0.224561	0.734336	1.06991	2.50202	0.173229	0.271703	0.351083	0.680531
117	0.224561	0.734336	1.06385	2.51012	0.173229	0.271436	0.349264	0.684895
118	0.224561	0.736842	1.06652	2.51012	0.169613	0.271157	0.34502	0.684091
119	0.22807	0.729323	1.02616	2.52632	0.169472	0.269211	0.339353	0.686516
120	0.238596	0.726817	0.991168	2.52227	0.172802	0.265817	0.334049	0.681961
121	0.235088	0.711779	1.00261	2.52227	0.173107	0.261716	0.33681	0.680814
122	0.22807	0.721804	1.00958	2.51822	0.168536	0.266424	0.344006	0.677635
123	0.210526	0.709273	0.997743	2.53441	0.171664	0.263224	0.343223	0.683298
124	0.207018	0.726817	0.991441	2.53846	0.173001	0.26804	0.342945	0.686313
125	0.224561	0.726817	0.975705	2.53846	0.169457	0.267252	0.347802	0.687967
126	0.259649	0.73183	0.977052	2.5587	0.176174	0.266715	0.351224	0.695218
127	0.263158	0.734336	0.970133	2.55466	0.174408	0.267248	0.353846	0.698329
128	0.266667	0.73183	0.956948	2.54251	0.173001	0.268858	0.351934	0.701519
129	0.277193	0.741855	0.982569	2.54656	0.178258	0.271689	0.351421	0.70531
130	0.280702	0.761905	0.987391	2.53441	0.177457	0.277685	0.355529	0.705469
131	0.291228	0.766917	0.98193	2.53036	0.183106	0.27979	0.353986	0.706767
132	0.294737	0.784461	0.990932	2.55061	0.182885	0.28359	0.359308	0.709479
133	0.301754	0.796992	1.00534	2.55061	0.18735	0.286998	0.361275	0.710579
134	0.308772	0.804511	1.02023	2.55466	0.1892	0.289671	0.361863	0.711304
135	0.312281	0.809524	1.01215	2.55061	0.190907	0.291562	0.368837	0.71774
136	0.319298	0.799499	1.00369	2.5668	0.194467	0.28774	0.370503	0.721578
137	0.329825	0.796992	1.01454	2.57895	0.200149	0.288876	0.375488	0.722484
138	0.333333	0.799499	1.03229	2.58704	0.199105	0.289568	0.381713	0.723561
139	0.326316	0.794486	1.06234	2.5749	0.193905	0.28889	0.383705	0.72097
140	0.336842	0.794486	1.07564	2.57895	0.200698	0.289961	0.376714	0.719874
141	0.336842	0.779449	1.07544	2.583	0.200369	0.285207	0.373833	0.721536
142	0.350877	0.774436	1.11634	2.57895	0.201869	0.285358	0.37577	0.717279
143	0.37193	0.761905	1.13473	2.5668	0.206188	0.283304	0.37629	0.719631
144	0.357895	0.75188	1.15693	2.57895	0.204694	0.282641	0.370687	0.721229
145	0.333333	0.739348	1.16382	2.57895	0.199899	0.278937	0.370568	0.717527
146	0.336842	0.741855	1.18274	2.59919	0.202334	0.282822	0.372861	0.718257
147	0.340351	0.73183	1.21511	2.59919	0.204608	0.281419	0.378011	0.716996
148	0.333333	0.729323	1.20286	2.59514	0.199899	0.285638	0.378861	0.715752
149	0.336842	0.719298	1.166	2.61134	0.200105	0.286262	0.374667	0.712922
150	0.34386	0.709273	1.1656	2.61538	0.19945	0.288792	0.378161	0.711946
151	0.34386	0.699248	1.14414	2.59514	0.199648	0.29033	0.373276	0.708747
152	0.347368	0.696742	1.13522	2.61134	0.201747	0.28873	0.368897	0.712374
153	0.347368	0.704261	1.12487	2.61538	0.201877	0.292149	0.367346	0.713864
154	0.350877	0.704261	1.13462	2.61538	0.204337	0.291607	0.367647	0.709898
155	0.350877	0.709273	1.14177	2.61943	0.204337	0.294849	0.365225	0.706508
156	0.354386	0.724311	1.14208	2.60729	0.204968	0.301229	0.365843	0.706243
157	0.375439	0.729323	1.14272	2.60324	0.210956	0.301959	0.362846	0.706544
158	0.396491	0.729323	1.11566	2.63158	0.216145	0.304417	0.359538	0.712959
159	0.4	0.724311	1.10832	2.62348	0.218629	0.301075	0.361493	0.71288
160	0.407018	0.734336	1.10099	2.61943	0.22214	0.305481	0.358353	0.712763
161	0.396491	0.739348	1.06577	2.62753	0.221867	0.307782	0.351741	0.714513
162	0.375439	0.749373	1.0545	2.62348	0.219115	0.311476	0.350087	0.713229
163	0.378947	0.756892	1.05615	2.62348	0.221886	0.311764	0.358942	0.71046
164	0.389474	0.766917	1.05176	2.61134	0.229289	0.315906	0.354894	0.709452
165	0.389474	0.769424	1.03596	2.62753	0.229289	0.318958	0.35409	0.716424
166	0.396491	0.774436	1.01884	2.63968	0.234919	0.32093	0.353585	0.716309
167	0.403509	0.77193	1.01119	2.65182	0.239523	0.319967	0.354808	0.71449
168	0.410526	0.77193	1.05788	2.65992	0.247888	0.322267	0.363745	0.715981
169	0.403509	0.779449	1.07739	2.65992	0.247487	0.322948	0.364281	0.711403
170	0.407018	0.784461	1.0959	2.69636	0.249282	0.325901	0.368403	0.710793
171	0.435088	0.789474	1.08989	2.7085	0.254466	0.331501	0.365098	0.706796
172	0.445614	0.779449	1.10659	2.72065	0.256295	0.330976	0.364129	0.703188
173	0.45614	0.77193	1.09116	2.73279	0.262489	0.333729	0.358491	0.70099
174	0.459649	0.769424	1.10856	2.73279	0.265278	0.332663	0.361235	0.70649
175	0.459649	0.759399	1.1252	2.74089	0.265477	0.332149	0.360491	0.708197
176	0.438596	0.75188	1.13568	2.74089	0.263241	0.333132	0.360911	0.704124
177	0.424561	0.761905	1.17498	2.73279	0.265973	0.335174	0.368862	0.694244
178	0.421053	0.769424	1.18069	2.76113	0.263058	0.340016	0.369592	0.693737
179	0.424561	0.769424	1.20002	2.77328	0.266864	0.343701	0.371239	0.686682
180	0.431579	0.774436	1.2114	2.78138	0.271507	0.346961	0.375224	0.683635
181	0.435088	0.769424	1.20162	2.81781	0.274371	0.347916	0.36997	0.682095
182	0.438596	0.774436	1.2076	2.84211	0.276154	0.351718	0.368699	0.678215
183	0.438596	0.769424	1.22275	2.89069	0.276154	0.350748	0.372324	0.676628
184	0.435088	0.77193	1.24631	2.90283	0.274371	0.352322	0.375564	0.666991
185	0.42807	0.774436	1.25704	2.93117	0.270907	0.356746	0.375858	0.664151
186	0.452632	0.77193	1.26211	2.96356	0.272844	0.35484	0.37679	0.663
187	0.459649	0.776942	1.2435	2.97166	0.269961	0.355853	0.376311	0.661505
188	0.45614	0.781955	1.22325	2.99595	0.269824	0.356286	0.371249	0.662654
189	0.466667	0.786967	1.22854	3	0.27535	0.357509	0.371267	0.656179
190	0.438596	0.781955	1.24259	3.01215	0.273224	0.357635	0.374262	0.647218
191	0.424561	0.786967	1.24843	3.04453	0.271956	0.357417	0.373792	0.651203
192	0.414035	0.796992	1.28174	3.06478	0.268068	0.358739	0.377396	0.650175
193	0.410526	0.817043	1.26937	3.08502	0.264916	0.362931	0.374971	0.646543
194	0.4	0.829574	1.27212	3.10121	0.262847	0.361297	0.37053	0.641107
195	0.389474	0.839599	1.27815	3.13765	0.25737	0.362547	0.370768	0.644259
196	0.375439	0.85213	1.24908	3.16194	0.248773	0.36284	0.36556	0.646129
197	0.375439	0.862155	1.24276	3.18219	0.25099	0.361636	0.36343	0.640308
198	0.361403	0.867168	1.23318	3.18219	0.244926	0.361018	0.362021	0.638058
199	0.347368	0.864662	1.2418	3.19838	0.241833	0.359919	0.363543	0.635647
200	0.354386	0.882205	1.24076	3.22267	0.24176	0.360072	0.361834	0.626729
201	0.368421	0.884712	1.21775	3.23482	0.249627	0.359352	0.355103	0.62105
202	0.357895	0.892231	1.18387	3.23887	0.248738	0.35911	0.346709	0.617897
203	0.357895	0.892231	1.14623	3.24696	0.2519	0.358191	0.337824	0.61339
204	0.357895	0.909774	1.13658	3.25506	0.255126	0.359966	0.33633	0.599999
205	0.326316	0.932331	1.12518	3.26721	0.24895	0.365747	0.335448	0.594607
206	0.319298	0.944862	1.13021	3.27126	0.255139	0.365716	0.333366	0.58967
207	0.319298	0.944862	1.12287	3.2996	0.255139	0.367138	0.332061	0.578652
208	0.301754	0.949875	1.0991	3.29555	0.248593	0.366581	0.325368	0.576012
209	0.298246	0.967419	1.09861	3.31174	0.248709	0.369181	0.323208	0.579942
210	0.294737	0.964912	1.09534	3.30364	0.245245	0.367351	0.321991	0.565453
211	0.294737	0.962406	1.07836	3.33603	0.245245	0.366881	0.324286	0.556922
212	0.301754	0.954887	1.0679	3.36032	0.25018	0.367566	0.315977	0.546601
213	0.315789	0.93985	1.05877	3.40081	0.246917	0.364846	0.313004	0.536194
214	0.319298	0.949875	1.05364	3.41296	0.250285	0.366617	0.313574	0.53098
215	0.319298	0.93985	1.07179	3.4332	0.250285	0.366991	0.317647	0.526557
216	0.312281	0.942356	1.05078	3.4251	0.247209	0.370544	0.314252	0.522063
217	0.308772	0.937343	1.01526	3.46559	0.243846	0.370681	0.30758	0.528499
218	0.305263	0.937343	1.009	3.47773	0.240487	0.369897	0.306001	0.527645
219	0.280702	0.927318	1.0175	3.47773	0.227549	0.370945	0.306164	0.531334
220	0.249123	0.924812	1.03394	3.51012	0.211306	0.370929	0.310872	0.530429
221	0.242105	0.922306	1.07108	3.55061	0.20441	0.372721	0.317301	0.524985
222	0.231579	0.9198	1.08727	3.57895	0.194082	0.376068	0.320774	0.513093
223	0.221053	0.892231	1.09453	3.59919	0.183777	0.368519	0.317884	0.514736
224	0.217544	0.887218	1.09131	3.61943	0.180347	0.367566	0.313852	0.511886
225	0.203509	0.879699	1.08168	3.64372	0.166663	0.368603	0.317627	0.510392
226	0.217544	0.877193	1.08266	3.63968	0.164752	0.368803	0.319709	0.517499
227	0.217544	0.877193	1.08898	3.68421	0.160535	0.37096	0.320265	0.523271
228	0.214035	0.87218	1.06948	3.69636	0.150492	0.372366	0.318299	0.525274
229	0.214035	0.877193	1.04461	3.7166	0.147213	0.373017	0.315934	0.532038
230	0.2	0.877193	1.05591	3.7247	0.134842	0.373918	0.310682	0.537372
231	0.185965	0.874687	1.0676	3.7247	0.121424	0.370856	0.321985	0.542273
232	0.164912	0.882205	1.07115	3.72874	0.114951	0.370864	0.323815	0.552996
233	0.164912	0.874687	1.06206	3.74494	0.111928	0.369484	0.323133	0.556995
234	0.161404	0.87218	1.04551	3.76113	0.105821	0.369147	0.323106	0.562697
235	0.157895	0.857143	1.07635	3.78543	0.0999934	0.363903	0.331569	0.571771
236	0.150877	0.857143	1.10035	3.80567	0.0937102	0.362886	0.341237	0.571675
237	0.140351	0.862155	1.08137	3.83401	0.0845024	0.36494	0.339904	0.579035
238	0.136842	0.854637	1.06217	3.8664	0.0815041	0.361935	0.333719	0.584856
239	0.140351	0.847118	1.06915	3.8502	0.0827675	0.362245	0.335003	0.584559
240	0.154386	0.844612	1.06289	3.82591	0.0878395	0.359863	0.334851	0.586577
241	0.164912	0.839599	1.05058	3.82996	0.0931455	0.358357	0.33213	0.591484
242	0.157895	0.862155	1.03796	3.85425	0.0891118	0.36494	0.334938	0.592773
243	0.154386	0.857143	1.05856	3.8583	0.0872368	0.363177	0.342902	0.593439
244	0.14386	0.862155	1.04806	3.87449	0.0803085	0.36541	0.341908	0.591465
245	0.122807	0.867168	1.05833	3.89879	0.0661103	0.367464	0.345966	0.587214
246	0.119298	0.864662	1.051	3.90283	0.0640428	0.368735	0.349301	0.587891
247	0.112281	0.857143	1.06522	3.90283	0.0603089	0.367707	0.349707	0.584863
248	0.108772	0.859649	1.07138	3.92713	0.0582166	0.368158	0.352397	0.585885
249	0.108772	0.874687	1.05194	3.92308	0.0582166	0.365193	0.359257	0.584126
250	0.0982456	0.882205	1.06631	3.92713	0.0528483	0.365796	0.361893	0.582968
251	0.0912281	0.897243	1.06902	3.92308	0.0491228	0.366995	0.367538	0.580161
252	0.0842105	0.904762	1.05773	3.91498	0.0458831	0.367626	0.362903	0.578166
253	0.0842105	0.912281	1.05763	3.93522	0.0461697	0.367459	0.362166	0.568241
254	0.0807018	0.927318	1.03773	3.95951	0.045032	0.368913	0.355424	0.563503
255	0.0877193	0.947368	1.03645	3.96356	0.0491765	0.371416	0.356521	0.558731
256	0.0877193	0.954887	1.06843	3.96761	0.0491765	0.370657	0.358371	0.547111
257	0.0912281	0.972431	1.10815	3.97166	0.0514829	0.373146	0.361536	0.539695
258	0.0982456	0.984962	1.09684	4	0.0510713	0.372801	0.357892	0.530349
259	0.0982456	1	1.10108	4.02834	0.0505521	0.375794	0.359917	0.526269
260	0.105263	1.00752	1.12112	4.04858	0.0545998	0.373476	0.3597	0.520735
261	0.112281	1.01253	1.12658	4.04858	0.057853	0.372248	0.353611	0.512278
262	0.108772	1.01504	1.13713	4.07287	0.0561404	0.370886	0.351154	0.504491
263	0.108772	1.02256	1.14854	4.09717	0.0561404	0.37132	0.352474	0.501218
264	0.101754	1.02005	1.14219	4.09312	0.0527484	0.370785	0.344966	0.494632
265	0.0982456	1.02506	1.16376	4.11336	0.0513289	0.371268	0.346292	0.488189
266	0.0947368	1.02506	1.1744	4.1498	0.0495861	0.370307	0.341964	0.479528
267	0.0912281	1.03509	1.17922	4.15385	0.0483105	0.373724	0.343288	0.475535
268	0.0947368	1.03258	1.19453	4.17409	0.0501153	0.375575	0.34481	0.467359
269	0.0982456	1.03509	1.22808	4.21457	0.0520942	0.373123	0.344763	0.462511
270	0.101754	1.02757	1.21982	4.25506	0.0542281	0.373305	0.341029	0.457469
271	0.105263	1.02506	1.22891	4.28745	0.0564995	0.37454	0.340123	0.450458
272	0.101754	1.01504	1.25232	4.2996	0.0542281	0.371383	0.343575	0.447126
273	0.0982456	1.02005	1.283	4.32794	0.0520942	0.373073	0.347073	0.445844
274	0.0982456	1.01002	1.29402	4.34008	0.0513289	0.373057	0.345641	0.442865
275	0.101754	1	1.28958	4.36842	0.0532462	0.371913	0.340305	0.441957
276	0.101754	0.994987	1.30593	4.37652	0.0532462	0.37308	0.340318	0.438482
277	0.0947368	0.987469	1.32964	4.37247	0.0539191	0.371947	0.343302	0.438062
278	0.077193	0.977444	1.31858	4.37247	0.0484196	0.37084	0.336849	0.438629
279	0.077193	0.964912	1.32698	4.39271	0.0489614	0.370409	0.337692	0.435262
280	0.0947368	0.944862	1.3446	4.38866	0.0577007	0.368089	0.340721	0.432147
281	0.101754	0.937343	1.35752	4.39271	0.0606578	0.371889	0.34367	0.432315
282	0.112281	0.927318	1.37866	4.37247	0.0622463	0.370821	0.350323	0.43403
283	0.119298	0.924812	1.41545	4.37652	0.0642484	0.37116	0.3611	0.4347
284	0.122807	0.907268	1.43059	4.37247	0.0644944	0.368759	0.368071	0.436478
285	0.126316	0.904762	1.42699	4.35628	0.0661369	0.369005	0.36995	0.438738
286	0.129825	0.897243	1.43835	4.36032	0.0677267	0.368841	0.370464	0.445313
287	0.129825	0.879699	1.45264	4.35223	0.0677267	0.370316	0.373489	0.452691
288	0.129825	0.867168	1.41813	4.34008	0.0679212	0.372934	0.372375	0.451207
289	0.129825	0.854637	1.4475	4.32794	0.0679212	0.372142	0.380201	0.452171
290	0.129825	0.854637	1.47569	4.33603	0.0685013	0.371947	0.389924	0.454771
291	0.140351	0.857143	1.45379	4.32794	0.0743732	0.370619	0.387317	0.457364
292	0.147368	0.837093	1.43578	4.2996	0.0760452	0.368491	0.387565	0.458537
293	0.150877	0.829574	1.42712	4.29555	0.0759874	0.366841	0.387261	0.463396
294	0.175439	0.83208	1.42641	4.30364	0.0858958	0.367984	0.389069	0.467464
295	0.196491	0.827068	1.37776	4.2996	0.0969753	0.365837	0.384369	0.46827
296	0.196491	0.824561	1.37509	4.31579	0.0969753	0.364666	0.386461	0.469316
297	0.203509	0.827068	1.37928	4.30769	0.100764	0.364102	0.390275	0.474577
298	0.189474	0.847118	1.38006	4.2834	0.0944021	0.363445	0.393654	0.481032
299	0.168421	0.864662	1.38764	4.27935	0.0856703	0.365393	0.390632	0.485326
300	0.164912	0.879699	1.37435	4.25101	0.0835921	0.363304	0.385729	0.48987
301	0.157895	0.884712	1.36221	4.27126	0.08056	0.36284	0.383941	0.480896
302	0.157895	0.904762	1.34524	4.26721	0.0831385	0.362931	0.38538	0.471409
303	0.157895	0.934837	1.35364	4.26721	0.0834553	0.36729	0.383252	0.469106
304	0.157895	0.937343	1.36703	4.26721	0.0856395	0.366422	0.379601	0.470051
305	0.157895	0.942356	1.3792	4.2834	0.0907254	0.366661	0.375987	0.46527
306	0.157895	0.952381	1.37851	4.27935	0.0907254	0.366913	0.372317	0.466179
307	0.157895	0.957393	1.4037	4.2915	0.0935881	0.366242	0.371322	0.469528
308	0.161404	0.967419	1.41208	4.2996	0.0968392	0.367336	0.372824	0.469897
309	0.154386	0.964912	1.42717	4.30769	0.0933718	0.369089	0.37618	0.471838
310	0.168421	0.97995	1.45277	4.30364	0.097617	0.374784	0.379633	0.475411
311	0.185965	0.997494	1.46543	4.30769	0.109425	0.378618	0.381644	0.470896
312	0.178947	1	1.48858	4.33198	0.109778	0.378679	0.384327	0.471482
313	0.150877	1.01253	1.5148	4.31174	0.0970297	0.379982	0.387834	0.46831
314	0.133333	1.01504	1.54822	4.31984	0.0859265	0.381856	0.39129	0.476281
315	0.133333	1.02005	1.57746	4.30364	0.0859265	0.385009	0.392356	0.474177
316	0.126316	1.02256	1.59174	4.33603	0.0863757	0.387061	0.39477	0.472917
317	0.122807	1.01253	1.59397	4.34818	0.0832442	0.389106	0.39509	0.469601
318	0.126316	1.01002	1.59096	4.36437	0.0863757	0.390303	0.393384	0.477249
319	0.126316	1.01002	1.59826	4.39271	0.0863757	0.390421	0.391614	0.472807
320	0.126316	1.00752	1.6128	4.36032	0.0863757	0.392606	0.395726	0.470519
321	0.119298	0.987469	1.60969	4.39271	0.0801441	0.389767	0.391138	0.480296
322	0.112281	0.97995	1.6049	4.4251	0.0773637	0.386531	0.394352	0.466373
323	0.112281	0.989975	1.61855	4.44939	0.0740533	0.389372	0.398494	0.454461
324	0.105263	0.982456	1.60552	4.44939	0.0681409	0.389096	0.398187	0.450577
325	0.101754	0.984962	1.60298	4.48583	0.0652669	0.388398	0.400853	0.447355
326	0.0982456	0.992481	1.5965	4.49393	0.0624578	0.391344	0.397087	0.434197
327	0.0947368	0.989975	1.56693	4.50607	0.0592794	0.391231	0.393621	0.430583
328	0.119298	0.994987	1.53787	4.51822	0.0774659	0.388444	0.386168	0.415014
329	0.105263	0.984962	1.5455	4.54656	0.067166	0.388991	0.389055	0.409271
330	0.0807018	0.97995	1.55991	4.5587	0.0497631	0.388658	0.393938	0.399967
331	0.0776058	0.987469	1.54135	4.5587	0.0475819	0.390054	0.389457	0.384207
332	0.0781287	0.97995	1.51651	4.59109	0.04757	0.38803	0.388375	0.376957
333	0.0717949	0.97995	1.51067	4.59919	0.0458291	0.385163	0.386338	0.367385
334	0.0657097	0.987469	1.50181	4.60729	0.0424489	0.386248	0.383149	0.360115
335	0.0635478	0.97995	1.50321	4.59919	0.041185	0.385437	0.381459	0.350972
336	0.0526316	0.972431	1.53872	4.60324	0.0401159	0.382537	0.376676	0.343044
337	0.0491228	0.969925	1.52404	4.61943	0.0385965	0.380358	0.373438	0.337225
338	0.0561404	0.964912	1.51207	4.61943	0.0389368	0.382187	0.369906	0.329502
339	0.0561404	0.954887	1.52631	4.67206	0.0399402	0.376974	0.363613	0.320154
340	0.0601504	0.964912	1.55045	4.67611	0.0412384	0.38044	0.366123	0.309361
341	0.0676692	0.952381	1.56516	4.65992	0.0410905	0.379652	0.363787	0.303905
342	0.0827068	0.93985	1.55299	4.65587	0.0441843	0.376045	0.358394	0.305769
343	0.0977444	0.927318	1.56973	4.66802	0.0493892	0.368125	0.358847	0.296677
344	0.112782	0.907268	1.56928	4.67611	0.0561211	0.363663	0.359456	0.287525
345	0.120301	0.899749	1.55915	4.65992	0.0604053	0.363227	0.357046	0.293864
346	0.142857	0.889724	1.56664	4.68016	0.0737475	0.360804	0.356111	0.287378
347	0.146617	0.877193	1.57596	4.68016	0.0761639	0.358851	0.356709	0.284459
348	0.154135	0.877193	1.57017	4.67206	0.0800356	0.357432	0.355997	0.287359
349	0.161654	0.864662	1.55473	4.70445	0.0858584	0.353578	0.353824	0.28183
350	0.172932	0.854637	1.56203	4.7004	0.0949658	0.353696	0.354833	0.285265
351	0.18797	0.847118	1.57897	4.7004	0.104139	0.352426	0.354817	0.282135
352	0.195489	0.829574	1.58901	4.70445	0.110585	0.349645	0.351593	0.280567
353	0.210526	0.817043	1.56264	4.72065	0.116901	0.349055	0.345224	0.274931
354	0.218045	0.81203	1.5512	4.73279	0.123502	0.347956	0.33545	0.272145
355	0.229323	0.809524	1.52548	4.74089	0.126091	0.349146	0.333382	0.273512
356	0.233083	0.804511	1.52264	4.72065	0.132476	0.352374	0.331749	0.268461
357	0.229323	0.796992	1.5228	4.74494	0.139363	0.35189	0.333272	0.266167
358	0.229323	0.79198	1.49177	4.72065	0.142787	0.353222	0.328496	0.264328
359	0.244361	0.776942	1.46922	4.71255	0.152783	0.352837	0.329363	0.259257
360	0.244361	0.77193	1.44982	4.73279	0.152783	0.350877	0.326696	0.264535
361	0.240602	0.764411	1.42935	4.72874	0.152886	0.34809	0.33143	0.267829
362	0.236842	0.77193	1.40032	4.72065	0.156834	0.353462	0.332683	0.269122
363	0.236842	0.779449	1.39154	4.7247	0.160682	0.353094	0.329812	0.269568
364	0.240602	0.766917	1.3941	4.75304	0.164177	0.349243	0.333667	0.266935
365	0.25188	0.77193	1.38627	4.75304	0.171826	0.348501	0.333096	0.266536
366	0.24812	0.761905	1.3703	4.73684	0.174146	0.344203	0.334842	0.268568
367	0.244361	0.776942	1.34664	4.76923	0.177313	0.342325	0.336375	0.260345
368	0.24812	0.789474	1.35174	4.76113	0.180868	0.341633	0.335439	0.263469
369	0.24812	0.794486	1.35542	4.77328	0.180868	0.339151	0.339501	0.261084
370	0.244361	0.802005	1.32721	4.77733	0.181039	0.337982	0.335887	0.253826
371	0.25188	0.81203	1.29748	4.76518	0.184272	0.337565	0.336922	0.253228
372	0.244361	0.819549	1.27866	4.78138	0.184844	0.335429	0.339962	0.254643
373	0.24812	0.819549	1.29124	4.79757	0.188408	0.336195	0.344072	0.245844
374	0.24812	0.827068	1.27993	4.80162	0.196093	0.3365	0.346266	0.241052
375	0.24812	0.827068	1.27476	4.79757	0.196093	0.333725	0.348854	0.24125
376	0.244361	0.827068	1.27368	4.77733	0.192524	0.332934	0.35325	0.246083
377	0.240602	0.837093	1.27633	4.77733	0.188957	0.335573	0.360676	0.254176
378	0.225564	0.844612	1.27655	4.77733	0.178576	0.338051	0.3646	0.255847
379	0.221805	0.842105	1.26294	4.76923	0.171163	0.335496	0.368068	0.255039
380	0.210526	0.857143	1.25256	4.78138	0.160527	0.337244	0.365243	0.248073
381	0.214286	0.85213	1.26908	4.77733	0.152956	0.334642	0.363189	0.24369
382	0.225564	0.85213	1.2613	4.76113	0.146695	0.336921	0.367391	0.240496
383	0.221805	0.867168	1.23074	4.75708	0.14074	0.33741	0.359024	0.239529
384	0.18797	0.877193	1.23161	4.74089	0.118195	0.335758	0.358116	0.237289
385	0.161654	0.879699	1.20694	4.74089	0.103007	0.336245	0.356743	0.236013
386	0.150376	0.857143	1.20135	4.72065	0.0915271	0.332299	0.359097	0.242318
387	0.142857	0.847118	1.1746	4.69636	0.0821317	0.327436	0.357307	0.238535
388	0.131579	0.837093	1.1716	4.69636	0.0734235	0.323729	0.356826	0.232808
389	0.12406	0.829574	1.1763	4.68421	0.0649776	0.322892	0.355094	0.232262
390	0.109023	0.827068	1.18063	4.67611	0.058259	0.324791	0.353431	0.228084
391	0.105263	0.804511	1.18478	4.66802	0.0540957	0.317957	0.354063	0.231526
392	0.093985	0.807018	1.1748	4.65182	0.0494816	0.31738	0.34537	0.23834
393	0.0827068	0.796992	1.14972	4.65587	0.0469888	0.312098	0.338376	0.24116
394	0.0789474	0.796992	1.16433	4.67611	0.0469996	0.310424	0.331722	0.237243
395	0.075188	0.79198	1.16223	4.68421	0.0472902	0.307675	0.333606	0.232185
396	0.0789474	0.774436	1.15234	4.72065	0.0469996	0.305063	0.328844	0.22101
397	0.0789474	0.769424	1.15178	4.7247	0.0469996	0.303423	0.330482	0.221873
398	0.075188	0.766917	1.14212	4.7247	0.0469888	0.304575	0.328866	0.228575
399	0.0789474	0.764411	1.16313	4.74494	0.0469996	0.307571	0.331898	0.225027
400	0.0639098	0.764411	1.15878	4.76923	0.0333633	0.30529	0.338462	0.228993
401	0.037594	0.764411	1.15609	4.76518	0.0145277	0.307142	0.337477	0.22713
402	0.0488722	0.754386	1.17283	4.75708	0.0209609	0.309254	0.344607	0.224924
403	0.0676692	0.744361	1.17962	4.75304	0.04004	0.310169	0.347952	0.229909
404	0.0714286	0.739348	1.19311	4.77328	0.0435015	0.311234	0.349213	0.234422
405	0.0676692	0.736842	1.19785	4.75304	0.04004	0.313126	0.350508	0.235781
406	0.0639098	0.736842	1.19174	4.76923	0.0403052	0.319547	0.348441	0.238935
407	0.0639098	0.739348	1.17002	4.77328	0.0403052	0.324879	0.345338	0.242098
408	0.0639098	0.741855	1.15337	4.75708	0.0403052	0.326427	0.343425	0.255526
409	0.0639098	0.739348	1.14893	4.76923	0.0403052	0.325812	0.346295	0.269659
410	0.0601504	0.756892	1.15274	4.75304	0.0401917	0.331571	0.348884	0.271879
411	0.0601504	0.754386	1.15343	4.76518	0.0401917	0.33099	0.353735	0.275656
412	0.0601504	0.754386	1.15372	4.74899	0.0401917	0.335109	0.355094	0.271994
413	0.056391	0.759399	1.12176	4.73684	0.0404057	0.337213	0.349894	0.283304
414	0.056391	0.756892	1.10706	4.74089	0.0404057	0.337563	0.346523	0.286388
415	0.0601504	0.764411	1.12412	4.71255	0.0405436	0.336588	0.346718	0.292835
416	0.0639098	0.756892	1.11455	4.71255	0.041349	0.335289	0.340162	0.305071
417	0.0676692	0.749373	1.13087	4.69231	0.0424509	0.333799	0.337207	0.30491
418	0.0639098	0.749373	1.12707	4.67611	0.0423671	0.331499	0.337114	0.316287
419	0.0902256	0.746867	1.10608	4.63968	0.0662381	0.333774	0.335513	0.326616
420	0.101504	0.746867	1.11326	4.61943	0.0767743	0.329218	0.335353	0.338539
421	0.0827068	0.749373	1.10775	4.59514	0.0630035	0.328983	0.330526	0.357531
422	0.0601504	0.749373	1.09361	4.57085	0.042594	0.328923	0.328686	0.369136
423	0.0601504	0.774436	1.11247	4.54251	0.039117	0.331285	0.330166	0.378378
424	0.0676692	0.774436	1.12579	4.54251	0.0396836	0.332021	0.331787	0.388017
425	0.0789474	0.784461	1.13976	4.51822	0.0428908	0.330862	0.332772	0.394077
426	0.0977444	0.796992	1.15042	4.49393	0.0529966	0.329792	0.336694	0.406834
427	0.101504	0.784461	1.1833	4.49393	0.0570268	0.326791	0.343111	0.411003
428	0.112782	0.799499	1.18611	4.48988	0.0650323	0.329118	0.340684	0.414095
429	0.12782	0.802005	1.19778	4.48988	0.0741865	0.327194	0.342271	0.417554
430	0.135338	0.804511	1.19082	4.47368	0.0802571	0.326836	0.338331	0.426375
431	0.139098	0.81203	1.21049	4.46559	0.083364	0.324881	0.346195	0.427408
432	0.146617	0.804511	1.21028	4.48988	0.0896963	0.324588	0.34325	0.423592
433	0.157895	0.81203	1.21094	4.48178	0.0956471	0.326663	0.349897	0.43142
434	0.176692	0.81203	1.19819	4.47368	0.109964	0.326703	0.345818	0.429652
435	0.180451	0.817043	1.20332	4.46154	0.114905	0.327047	0.34044	0.429452
436	0.18797	0.829574	1.20765	4.47368	0.124059	0.329724	0.341013	0.426167
437	0.195489	0.829574	1.19103	4.47368	0.130174	0.329984	0.338964	0.421348
438	0.172932	0.829574	1.19264	4.48583	0.124027	0.330124	0.339808	0.418648
439	0.165414	0.827068	1.19025	4.51822	0.124988	0.333132	0.34153	0.407632
440	0.169173	0.824561	1.19758	4.54251	0.128499	0.333729	0.348071	0.400714
441	0.172932	0.81203	1.20067	4.55061	0.132016	0.333911	0.350016	0.39703
442	0.176692	0.786967	1.1779	4.57895	0.135539	0.331312	0.348263	0.394489
443	0.180451	0.789474	1.16781	4.57085	0.13534	0.333801	0.336377	0.389135
444	0.176692	0.784461	1.18266	4.583	0.13182	0.33378	0.335515	0.392932
445	0.161654	0.766917	1.18687	4.5668	0.120663	0.33476	0.330357	0.390924
446	0.157895	0.764411	1.16495	4.55466	0.117143	0.335725	0.32333	0.391717
447	0.157895	0.75188	1.17275	4.55061	0.113572	0.330188	0.317192	0.392939
448	0.157895	0.741855	1.15637	4.54251	0.110143	0.329764	0.314	0.394191
449	0.157895	0.734336	1.17256	4.53846	0.110143	0.330275	0.316343	0.396427
450	0.184211	0.729323	1.17471	4.55466	0.1182	0.329572	0.312512	0.402052
451	0.206767	0.721804	1.18518	4.52632	0.125284	0.330368	0.319672	0.405455
452	0.203008	0.711779	1.1899	4.52227	0.125442	0.329618	0.322855	0.408225
453	0.184211	0.714286	1.18393	4.50607	0.116749	0.331473	0.326563	0.416752
454	0.180451	0.704261	1.19261	4.53036	0.115889	0.328613	0.329908	0.419763
455	0.176692	0.704261	1.19974	4.51822	0.112518	0.329275	0.331811	0.421383
456	0.176692	0.691729	1.21106	4.51417	0.112518	0.325504	0.333132	0.425506
457	0.180451	0.696742	1.21433	4.51417	0.115889	0.325152	0.332609	0.427546
458	0.184211	0.691729	1.19546	4.51822	0.119276	0.323206	0.327775	0.43076
459	0.18797	0.684211	1.18404	4.52632	0.122678	0.320537	0.323326	0.431673
460	0.195489	0.686717	1.17668	4.54251	0.129517	0.321758	0.322729	0.432551
461	0.195489	0.691729	1.1947	4.55061	0.129517	0.321611	0.321651	0.431369
462	0.184211	0.686717	1.18311	4.5749	0.122334	0.320732	0.324027	0.427226
463	0.176692	0.674185	1.17337	4.57895	0.115508	0.320467	0.323982	0.421263
464	0.172932	0.669173	1.13967	4.59919	0.112116	0.318019	0.32064	0.423304
465	0.169173	0.66416	1.13106	4.59919	0.108739	0.31784	0.317136	0.415472
466	0.165414	0.656642	1.11516	4.59109	0.103885	0.31989	0.315144	0.412754
467	0.172932	0.654135	1.11874	4.59514	0.10706	0.320137	0.314377	0.408395
468	0.176692	0.646617	1.09356	4.59109	0.108008	0.31748	0.310401	0.40869
469	0.146617	0.641604	1.08081	4.58704	0.091732	0.318133	0.313257	0.407676
470	0.116541	0.631579	1.10311	4.60729	0.0767214	0.314597	0.314406	0.403418
471	0.109023	0.626566	1.09284	4.62348	0.0706055	0.313461	0.312551	0.396995
472	0.105263	0.619048	1.09072	4.66802	0.0676328	0.312048	0.312255	0.388108
473	0.101504	0.621554	1.06302	4.64372	0.0647273	0.313959	0.301868	0.3808
474	0.093985	0.616541	1.04589	4.64777	0.0591578	0.314893	0.298573	0.380391
475	0.0864662	0.614035	1.0612	4.65587	0.0539924	0.314876	0.301014	0.367582
476	0.0827068	0.60401	1.05549	4.67206	0.0493481	0.316053	0.304833	0.359895
477	0.075188	0.60401	1.08452	4.65587	0.0454521	0.317801	0.306123	0.360559
478	0.0676692	0.596491	1.09886	4.63968	0.0424509	0.317525	0.310958	0.356609
479	0.056391	0.606516	1.10987	4.63158	0.0400526	0.317884	0.31703	0.350489
480	0.0488722	0.598997	1.09161	4.63563	0.0400526	0.318689	0.317858	0.343502
481	0.0488722	0.60401	1.09858	4.64372	0.0400526	0.318423	0.319341	0.335059
482	0.0488722	0.609023	1.09769	4.65587	0.0400526	0.321821	0.315968	0.328231
483	0.0488722	0.616541	1.14267	4.67206	0.0400526	0.322406	0.317116	0.313824
484	0.0488722	0.619048	1.15186	4.7166	0.0400526	0.322361	0.322049	0.307617
485	0.0676692	0.626566	1.16354	4.7247	0.0472043	0.324238	0.322619	0.308517
486	0.0676692	0.626566	1.15096	4.74899	0.0472043	0.323953	0.32354	0.302354
487	0.0601504	0.636591	1.15901	4.78138	0.0368738	0.325334	0.322147	0.297242
488	0.0601504	0.64411	1.1576	4.79352	0.0368738	0.326568	0.319168	0.28941
489	0.0601504	0.666667	1.13739	4.80567	0.0368738	0.329753	0.323017	0.28245
490	0.0601504	0.676692	1.13951	4.78947	0.0368738	0.331328	0.321382	0.286793
491	0.056391	0.679198	1.14023	4.78138	0.0363332	0.330583	0.319129	0.289249
492	0.056391	0.686717	1.16662	4.79757	0.0363332	0.330874	0.320109	0.287772
493	0.0601504	0.686717	1.15055	4.80567	0.0364865	0.329495	0.310733	0.286383
494	0.0639098	0.696742	1.13488	4.81781	0.0369974	0.333087	0.307387	0.296331
495	0.0639098	0.709273	1.14504	4.80567	0.0377575	0.333972	0.303436	0.298645
496	0.0714286	0.716792	1.11974	4.82186	0.0404559	0.33458	0.304881	0.292345
497	0.075188	0.739348	1.08437	4.83401	0.0422112	0.338344	0.299858	0.288142
498	0.0789474	0.736842	1.07216	4.83806	0.0441957	0.336399	0.292516	0.289533
499	0.0864662	0.749373	1.08946	4.82186	0.0487378	0.338489	0.293852	0.294342
500	0.093985	0.754386	1.10543	4.81377	0.0538796	0.339353	0.290877	0.295671
501	0.12406	0.749373	1.09655	4.80567	0.0733958	0.336985	0.294667	0.29379
502	0.142857	0.754386	1.07724	4.80162	0.0858525	0.339295	0.295302	0.301413
503	0.150376	0.769424	1.07522	4.78138	0.0904342	0.340559	0.293398	0.307519
504	0.135338	0.784461	1.09037	4.79352	0.0870497	0.343825	0.294981	0.298888
505	0.120301	0.79198	1.10835	4.77733	0.0836738	0.344123	0.302677	0.310239
506	0.12406	0.802005	1.102	4.77328	0.0907087	0.346386	0.302779	0.311223
507	0.135338	0.807018	1.09063	4.74899	0.100953	0.345631	0.30476	0.315629
508	0.146617	0.807018	1.10528	4.73684	0.108739	0.346603	0.306358	0.320367
509	0.157895	0.814536	1.10894	4.73684	0.119068	0.349149	0.304497	0.327873
510	0.169173	0.822055	1.11138	4.7247	0.12949	0.351668	0.301374	0.325271
511	0.176692	0.83208	1.12648	4.7247	0.136479	0.352851	0.301025	0.330846
512	0.18797	0.847118	1.14487	4.73279	0.147013	0.354367	0.31121	0.325833
513	0.199248	0.847118	1.16616	4.72065	0.153763	0.354218	0.308997	0.317605
514	0.221805	0.849624	1.18575	4.71255	0.165252	0.354541	0.310553	0.328663
515	0.25188	0.847118	1.20203	4.7085	0.168739	0.353136	0.307918	0.335296
516	0.289474	0.839599	1.25104	4.71255	0.181051	0.350692	0.306999	0.340498
517	0.308271	0.849624	1.2624	4.72065	0.187458	0.351459	0.306153	0.346483
518	0.319549	0.859649	1.27043	4.73279	0.190659	0.353275	0.306042	0.342933
519	0.342105	0.862155	1.27008	4.73279	0.194151	0.352437	0.306255	0.345358
520	0.334586	0.877193	1.28322	4.7247	0.19654	0.355564	0.307535	0.352467
521	0.338346	0.874687	1.29747	4.75304	0.199061	0.351537	0.310937	0.354137
522	0.360902	0.882205	1.32454	4.74899	0.207252	0.35351	0.313185	0.353373
523	0.379699	0.874687	1.31692	4.75708	0.20789	0.35324	0.31652	0.359322
524	0.402256	0.869674	1.33223	4.76518	0.216028	0.350055	0.32087	0.353094
525	0.417293	0.874687	1.3467	4.75708	0.224468	0.348352	0.329122	0.355096
526	0.428571	0.874687	1.37684	4.76113	0.227385	0.348447	0.337508	0.362033
527	0.443609	0.87218	1.37837	4.74899	0.237162	0.348335	0.341683	0.36387
528	0.458647	0.864662	1.43059	4.75304	0.242711	0.345941	0.347131	0.364417
529	0.488722	0.859649	1.46064	4.75304	0.248094	0.345173	0.353902	0.371033
530	0.511278	0.854637	1.47404	4.75304	0.253531	0.343709	0.355739	0.369354
531	0.518797	0.839599	1.49418	4.74089	0.256009	0.339609	0.360047	0.380254
532	0.522556	0.847118	1.48465	4.75304	0.260607	0.338547	0.357317	0.374131
533	0.518797	0.857143	1.48547	4.76923	0.262475	0.33933	0.356544	0.364425
534	0.503759	0.859649	1.51502	4.78138	0.269094	0.340692	0.362089	0.352048
535	0.477444	0.869674	1.48985	4.77733	0.264502	0.3447	0.364972	0.34877
536	0.481203	0.869674	1.48262	4.80162	0.267673	0.342839	0.368566	0.343951
537	0.492481	0.864662	1.48098	4.79352	0.275557	0.342877	0.372869	0.336504
538	0.488722	0.867168	1.47892	4.80162	0.279286	0.343992	0.376713	0.336171
539	0.488722	0.87218	1.46807	4.79352	0.279693	0.342896	0.375874	0.337031
540	0.488722	0.884712	1.46304	4.78543	0.283075	0.346532	0.375156	0.33803
541	0.488722	0.882205	1.44785	4.78947	0.285026	0.345814	0.369679	0.338741
542	0.484962	0.889724	1.44973	4.79352	0.289464	0.345509	0.370965	0.334386
543	0.477444	0.907268	1.44912	4.77733	0.290213	0.348057	0.373222	0.336276
544	0.492481	0.902256	1.45869	4.77328	0.295555	0.350801	0.374307	0.332625
545	0.522556	0.907268	1.46564	4.75304	0.301544	0.352669	0.377751	0.332945
546	0.530075	0.914787	1.4682	4.76518	0.302297	0.353016	0.3802	0.328447
547	0.533835	0.934837	1.4184	4.76923	0.30633	0.353211	0.384927	0.315426
548	0.518797	0.942356	1.38779	4.75708	0.308179	0.354125	0.383537	0.309171
549	0.518797	0.954887	1.34943	4.74089	0.318783	0.357782	0.38752	0.309626
550	0.526316	0.967419	1.34516	4.73279	0.323039	0.362219	0.388376	0.304771
551	0.537594	0.962406	1.34692	4.7085	0.32962	0.362813	0.393674	0.309807
552	0.545113	0.957393	1.33162	4.72065	0.334132	0.361967	0.394309	0.306393
553	0.552632	0.969925	1.29723	4.7166	0.338741	0.3642	0.391371	0.304659
554	0.56015	0.972431	1.30599	4.69636	0.343441	0.363313	0.39428	0.311666
555	0.556391	0.964912	1.3207	4.65587	0.340913	0.360958	0.395113	0.314528
556	0.548872	0.987469	1.30396	4.64372	0.336002	0.3633	0.390159	0.31971
557	0.541353	0.982456	1.32285	4.62348	0.331007	0.360336	0.391202	0.321189
558	0.541353	0.994987	1.33184	4.63158	0.331092	0.364079	0.396747	0.320034
559	0.537594	0.994987	1.34384	4.60324	0.328584	0.361644	0.400384	0.319347
560	0.556391	1.00501	1.34899	4.59514	0.321439	0.364839	0.406222	0.321329
561	0.556391	1.00251	1.34718	4.57085	0.313202	0.363582	0.411834	0.315893
562	0.541353	1.00251	1.339	4.59109	0.303608	0.364814	0.412668	0.32242
563	0.507519	1.00752	1.33259	4.59109	0.284186	0.363379	0.415497	0.322089
564	0.466165	1.01253	1.31755	4.62348	0.267514	0.365472	0.416263	0.3155
565	0.43985	1.00752	1.31733	4.61538	0.255217	0.366128	0.416026	0.31395
566	0.413534	1	1.32684	4.61134	0.238485	0.369333	0.418956	0.323321
567	0.394737	1.00501	1.34794	4.61943	0.226691	0.371077	0.423203	0.323684
568	0.379699	1	1.34048	4.61943	0.21342	0.370207	0.422048	0.323629
569	0.364662	0.997494	1.3268	4.61538	0.203071	0.369663	0.425446	0.321992
570	0.334586	0.997494	1.32705	4.61134	0.183765	0.369556	0.421536	0.324746
571	0.308271	1	1.3287	4.583	0.167105	0.372958	0.419282	0.33682
572	0.278195	1	1.34341	4.53846	0.148044	0.373806	0.42442	0.358759
573	0.255639	1.00501	1.35376	4.53036	0.133878	0.376073	0.419094	0.362026
574	0.236842	1.02256	1.35261	4.51417	0.12245	0.381759	0.420626	0.36426
575	0.221805	1	1.35868	4.48988	0.110681	0.378871	0.427964	0.362365
576	0.225564	1.01002	1.36007	4.46559	0.109811	0.384463	0.42904	0.37325
577	0.203008	0.994987	1.37297	4.44534	0.0981188	0.381298	0.434621	0.380915
578	0.195489	0.992481	1.36342	4.41296	0.094064	0.385006	0.435097	0.385835
579	0.161654	0.97995	1.33962	4.39676	0.0787833	0.383464	0.431741	0.393255
580	0.135338	0.974937	1.34943	4.38057	0.0669391	0.383931	0.431857	0.410683
581	0.12782	0.974937	1.36265	4.35223	0.0632285	0.385217	0.43479	0.418488
582	0.12406	0.97995	1.36041	4.32794	0.0616111	0.388912	0.433745	0.42713
583	0.120301	0.977444	1.36777	4.31174	0.0618002	0.385627	0.436872	0.439599
584	0.120301	0.97995	1.38201	4.30364	0.0618002	0.385643	0.43901	0.446043
585	0.12406	0.987469	1.37687	4.2915	0.0634288	0.383386	0.43543	0.450537
586	0.120301	0.997494	1.37307	4.27935	0.0608738	0.387978	0.434031	0.459967
587	0.109023	0.997494	1.38626	4.26316	0.0565264	0.388165	0.434057	0.470261
588	0.101504	1.00501	1.3745	4.25911	0.0555121	0.390629	0.431746	0.473064
589	0.109023	1.00752	1.38138	4.24696	0.061347	0.391445	0.436468	0.483567
590	0.116541	1.01002	1.38472	4.23887	0.0640021	0.38966	0.438666	0.480037
591	0.12782	1.01504	1.36673	4.25506	0.0734166	0.393358	0.434689	0.473528
592	0.146617	1.00752	1.37365	4.25101	0.0819152	0.390534	0.439426	0.476232
593	0.180451	1.00501	1.35685	4.27126	0.0972254	0.389564	0.436999	0.477821
594	0.184211	1.01253	1.33707	4.26316	0.100535	0.393019	0.431431	0.491168
595	0.169173	1.00501	1.30271	4.2753	0.0972932	0.388003	0.428666	0.496316
596	0.184211	1.00501	1.29399	4.29555	0.106571	0.388258	0.426265	0.494933
597	0.180451	1.00501	1.27108	4.29555	0.112025	0.38751	0.421481	0.499895
598	0.176692	1.00752	1.26568	4.29555	0.118782	0.387771	0.420494	0.504738
599	0.184211	1.00752	1.24391	4.30364	0.125656	0.387533	0.417125	0.501087
600	0.195489	0.997494	1.20677	4.29555	0.133407	0.385848	0.410621	0.502234
601	0.203008	0.992481	1.18546	4.2915	0.140303	0.384475	0.40705	0.504248
602	0.199248	0.989975	1.15918	4.25101	0.13685	0.386738	0.400622	0.502644
603	0.203008	0.987469	1.11986	4.21862	0.140303	0.38647	0.394417	0.511285
604	0.203008	0.977444	1.09648	4.20243	0.140303	0.385268	0.38769	0.513018
605	0.206767	0.972431	1.06803	4.18219	0.143764	0.379525	0.389178	0.510999
606	0.210526	0.97995	1.0539	4.17004	0.147233	0.379018	0.390304	0.511608
607	0.233083	0.987469	1.04137	4.17004	0.151767	0.379217	0.391793	0.520144
608	0.259398	1	1.00793	4.15789	0.158251	0.378993	0.389246	0.518566
609	0.259398	0.997494	0.981086	4.16599	0.158341	0.377973	0.389537	0.525906
610	0.259398	0.992481	0.957147	4.15385	0.154986	0.377236	0.388232	0.527612
611	0.255639	0.987469	0.912715	4.16599	0.152434	0.376757	0.38439	0.526142
612	0.240602	0.977444	0.919588	4.14575	0.146626	0.374116	0.384161	0.530354
613	0.24812	0.97995	0.910153	4.1498	0.146888	0.370874	0.377003	0.532749
614	0.24812	0.977444	0.899697	4.14575	0.14376	0.370822	0.371531	0.53022
615	0.240602	0.962406	0.880153	4.1417	0.137837	0.366971	0.37025	0.533367
616	0.24812	0.954887	0.877549	4.1498	0.13791	0.363542	0.368785	0.534977
617	0.24812	0.949875	0.869509	4.13765	0.135205	0.364144	0.364886	0.536326
618	0.255639	0.957393	0.862789	4.12551	0.139184	0.365791	0.362245	0.535365
619	0.255639	0.957393	0.857006	4.11336	0.139287	0.365286	0.359805	0.535873
620	0.259398	0.949875	0.855834	4.09312	0.140162	0.364253	0.354875	0.542175
621	0.289474	0.937343	0.850522	4.12955	0.14865	0.359535	0.353492	0.544119
622	0.300752	0.932331	0.850355	4.13765	0.149287	0.35582	0.354191	0.5433
623	0.300752	0.932331	0.859712	4.14575	0.149287	0.354892	0.362719	0.541257
624	0.300752	0.9198	0.868729	4.14575	0.146598	0.352083	0.361136	0.545082
625	0.31203	0.897243	0.860117	4.1336	0.148048	0.348068	0.359557	0.548054
626	0.293233	0.87218	0.855462	4.10931	0.141297	0.342299	0.355856	0.547011
627	0.270677	0.859649	0.853217	4.10931	0.136921	0.342911	0.357466	0.546913
628	0.263158	0.857143	0.868733	4.08502	0.132721	0.344366	0.356729	0.545713
629	0.270677	0.854637	0.873918	4.10121	0.134196	0.34219	0.358338	0.542545
630	0.270677	0.849624	0.880801	4.08907	0.132062	0.340923	0.363969	0.54156
631	0.266917	0.847118	0.861036	4.08907	0.129521	0.340935	0.365696	0.541462
632	0.263158	0.837093	0.860148	4.11336	0.12881	0.340974	0.364255	0.541903
633	0.266917	0.829574	0.865552	4.12146	0.131912	0.3408	0.369415	0.541101
634	0.266917	0.83208	0.866355	4.12146	0.131912	0.341084	0.372526	0.537875
635	0.266917	0.829574	0.862171	4.12955	0.133091	0.343306	0.369864	0.536925
636	0.285714	0.827068	0.879276	4.1417	0.136282	0.341442	0.376518	0.535493
637	0.285714	0.819549	0.876899	4.1336	0.133225	0.339863	0.380735	0.536726
638	0.289474	0.819549	0.897714	4.16599	0.134185	0.340348	0.381421	0.541346
639	0.285714	0.822055	0.910932	4.18219	0.131616	0.342143	0.384532	0.536263
640	0.259398	0.829574	0.916175	4.17814	0.119123	0.345833	0.387301	0.538969
641	0.25188	0.837093	0.939571	4.19838	0.119803	0.349589	0.38695	0.539417
642	0.263158	0.837093	0.946418	4.19838	0.124092	0.350116	0.38504	0.544137
643	0.270677	0.839599	0.95267	4.22267	0.128463	0.352118	0.389621	0.545701
644	0.266917	0.849624	0.969545	4.25911	0.130287	0.356841	0.389353	0.541005
645	0.270677	0.847118	0.978306	4.27126	0.130002	0.357166	0.391829	0.545756
646	0.266917	0.839599	0.991353	4.2834	0.127643	0.356308	0.389466	0.541663
647	0.270677	0.842105	0.98475	4.29555	0.129893	0.35855	0.387494	0.5351
648	0.255639	0.834586	0.992874	4.28745	0.123041	0.355006	0.387935	0.541666
649	0.263158	0.837093	1.01426	4.31174	0.12881	0.354646	0.386493	0.542774
650	0.281955	0.834586	1.03058	4.31174	0.140176	0.3556	0.384803	0.540709
651	0.278195	0.824561	1.04903	4.31174	0.140563	0.351309	0.38294	0.541923
652	0.270677	0.829574	1.05955	4.31174	0.137128	0.351226	0.380622	0.545711
653	0.278195	0.829574	1.07278	4.29555	0.140966	0.350738	0.37546	0.544671
654	0.274436	0.827068	1.09269	4.2996	0.139115	0.349669	0.379969	0.537908
655	0.255639	0.829574	1.094	4.31174	0.129125	0.348284	0.37715	0.539986
656	0.25188	0.822055	1.13545	4.33198	0.130691	0.3471	0.374988	0.54434
657	0.25188	0.809524	1.13153	4.31174	0.130037	0.343528	0.37565	0.53287
658	0.255639	0.796992	1.125	4.30364	0.132062	0.338204	0.376309	0.535286
659	0.259398	0.799499	1.1246	4.29555	0.134154	0.339301	0.376019	0.535929
660	0.25188	0.786967	1.10162	4.27935	0.127053	0.336624	0.372271	0.535095
661	0.244361	0.779449	1.09834	4.28745	0.123588	0.336647	0.370647	0.52829
662	0.24812	0.769424	1.09063	4.28745	0.12437	0.33525	0.368927	0.531774
663	0.270677	0.759399	1.07275	4.25101	0.132384	0.33201	0.365028	0.535286
664	0.270677	0.761905	1.08495	4.24696	0.134196	0.332249	0.367512	0.532434
665	0.270677	0.766917	1.06127	4.24292	0.134196	0.334917	0.366073	0.533871
666	0.266917	0.749373	1.06398	4.25101	0.132235	0.329404	0.360564	0.535386
667	0.266917	0.75188	1.0872	4.22267	0.132235	0.330328	0.361755	0.531692
668	0.259398	0.75188	1.0922	4.20648	0.130068	0.331425	0.360975	0.534533
669	0.233083	0.744361	1.07175	4.21053	0.121046	0.32885	0.361493	0.538193
670	0.229323	0.749373	1.08932	4.19838	0.119853	0.331659	0.366314	0.535585
671	0.229323	0.746867	1.09585	4.17409	0.119853	0.331713	0.367229	0.532467
672	0.218045	0.744361	1.11006	4.17004	0.112801	0.333134	0.371996	0.536909
673	0.210526	0.744361	1.11474	4.1498	0.108191	0.333095	0.369381	0.538385
674	0.199248	0.729323	1.12592	4.1417	0.104066	0.329371	0.369184	0.533733
675	0.199248	0.721804	1.10309	4.1417	0.105557	0.328084	0.367682	0.531298
676	0.184211	0.729323	1.11119	4.16599	0.0962025	0.329992	0.35788	0.53108
677	0.18797	0.729323	1.11458	4.17409	0.0972254	0.330231	0.3582	0.526126
678	0.210526	0.709273	1.14209	4.19838	0.106337	0.323764	0.358053	0.517338
679	0.210526	0.696742	1.15873	4.22267	0.108846	0.320576	0.360472	0.515928
680	0.199248	0.679198	1.17223	4.22267	0.102968	0.314783	0.358831	0.518503
681	0.18797	0.674185	1.1861	4.23077	0.0973714	0.313413	0.356848	0.516836
682	0.154135	0.669173	1.18723	4.26316	0.0816173	0.313045	0.358191	0.512816
683	0.139098	0.659148	1.18091	4.30769	0.0747384	0.311025	0.354484	0.504819
684	0.135338	0.64411	1.19915	4.31579	0.0732228	0.305943	0.351709	0.50094
685	0.131579	0.646617	1.18737	4.32389	0.071859	0.307711	0.35363	0.499373
686	0.12782	0.634085	1.15638	4.37247	0.0706558	0.306408	0.351962	0.501559
687	0.112782	0.621554	1.13126	4.38057	0.0609737	0.307356	0.343776	0.495743
688	0.101504	0.62406	1.12504	4.39676	0.0531591	0.31159	0.340686	0.49576
689	0.093985	0.619048	1.0918	4.40486	0.0508968	0.309501	0.335394	0.489552
690	0.0902256	0.609023	1.07628	4.4251	0.0501234	0.310876	0.330097	0.487956
691	0.0864662	0.614035	1.04809	4.43725	0.0496045	0.309553	0.330496	0.48759
692	0.0864662	0.614035	1.03296	4.46964	0.0493173	0.311761	0.328695	0.488466
693	0.112782	0.614035	1.01905	4.47773	0.068852	0.311718	0.327246	0.490135
694	0.116541	0.62406	0.996764	4.48178	0.0803393	0.313637	0.326869	0.484245
695	0.116541	0.62406	1.00116	4.48583	0.0803393	0.309445	0.331655	0.49186
696	0.101504	0.62406	0.996528	4.49393	0.0750906	0.310445	0.332588	0.488941
697	0.0676692	0.629073	0.976016	4.47773	0.0517959	0.310577	0.331644	0.493924
698	0.0601504	0.639098	0.975536	4.46559	0.0448679	0.312161	0.332869	0.489678
699	0.0601504	0.649123	0.957626	4.48583	0.0448679	0.315734	0.335137	0.485135
700	0.0526316	0.649123	0.945803	4.47368	0.0436296	0.312205	0.339746	0.487284
701	0.0526316	0.666667	0.970624	4.48583	0.0436296	0.314394	0.344633	0.488382
702	0.0526316	0.679198	0.985407	4.45749	0.0436296	0.314028	0.350891	0.491326
703	0.0488722	0.694236	0.993275	4.44534	0.0434549	0.319457	0.356213	0.494971
704	0.0488722	0.694236	1.02827	4.4332	0.0434549	0.318713	0.359003	0.499917
705	0.0488722	0.699248	1.05328	4.4251	0.0434549	0.318703	0.361281	0.501169
706	0.0526316	0.711779	1.06221	4.42105	0.0436296	0.318754	0.364854	0.503204
707	0.0526316	0.711779	1.08075	4.42105	0.0436296	0.316407	0.363669	0.49856
708	0.075188	0.714286	1.10603	4.41296	0.0652192	0.318153	0.368184	0.503586
709	0.0902256	0.729323	1.10691	4.417	0.0796734	0.320213	0.365859	0.504137
710	0.093985	0.734336	1.12181	4.42105	0.079807	0.321758	0.365944	0.50493
711	0.0902256	0.736842	1.14421	4.40891	0.0762105	0.322812	0.367672	0.503914
712	0.0639098	0.746867	1.15593	4.40081	0.0511751	0.32634	0.369325	0.499326
713	0.056391	0.749373	1.17682	4.38866	0.0378648	0.327456	0.370918	0.505933
714	0.056391	0.754386	1.20252	4.34818	0.0378648	0.329613	0.373351	0.503928
715	0.0639098	0.761905	1.20914	4.34413	0.0423671	0.328295	0.36914	0.500359
716	0.0676692	0.766917	1.19279	4.34413	0.0437689	0.330377	0.359717	0.495115
717	0.075188	0.77193	1.11291	4.31984	0.0451385	0.330831	0.341708	0.493421
718	0.0864662	0.77193	1.12312	4.29555	0.0487378	0.327323	0.370908	0.491476
719	0.093985	0.790063	1.20897	4.29555	0.0511751	0.329825	0.437464	0.485295

## Sheet: Panel D
Time (sec)	Mean 0.01	Mean 0.03	Mean 1.0	C 3.0	SEM 0.01	SEM 0.03	SEM 1.0	SEM 3.0
-120	0.276923	0.171429	0	1.55556	0.0863459	0.110657	0	0.242161
-119	0.0923077	0.0571429	0	0.592593	0.028782	0.0368856	0	0.107981
-118	0.0646154	0.102857	0	0.377778	0.0219736	0.0845637	0	0.0702728
-117	0.0461538	0.0857143	0	0.31746	0.0156954	0.0724418	0	0.0462774
-116	0.0410256	0.0857143	0	0.259259	0.0120267	0.0645936	0	0.0414087
-115	0.0335664	0.109091	0	0.222222	0.00984003	0.0914271	0	0.040404
-114	0.0284024	0.105495	0	0.196581	0.00832618	0.0904843	0	0.0407666
-113	0.0338462	0.114286	0	0.177778	0.0118505	0.101204	0	0.041574
-112	0.0298643	0.110924	0	0.176471	0.0104563	0.0935155	0	0.0545859
-111	0.0267206	0.121805	0	0.181287	0.00935564	0.101144	0	0.0713235
-110	0.0121457	0.121805	0	0.116959	0.00761736	0.106406	0	0.0844923
-109	0.0121457	0.126316	0	0.116959	0.00761736	0.110902	0	0.0910667
-108	0.0121457	0.130827	0	0.122807	0.00761736	0.115398	0	0.0968891
-107	0.0097166	0.130827	0	0.122807	0.00552153	0.11035	0	0.10342
-106	0.0097166	0.121805	0	0.140351	0.00552153	0.101378	0	0.120913
-105	0.0097166	0.130827	0	0.140351	0.00552153	0.11035	0	0.120913
-104	0.0097166	0.126316	0	0.134503	0.00552153	0.105863	0	0.128055
-103	0.00728745	0.121805	0.0080329	0.128655	0.00524756	0.106406	0.0080329	0.122214
-102	0.00728745	0.121805	0.0181861	0.134503	0.00524756	0.106406	0.0181861	0.121583
-101	0.0097166	0.112782	0.0181861	0.140351	0.00748714	0.0974199	0.0181861	0.12123
-100	0.0097166	0.112782	0.0181861	0.152047	0.00748714	0.0974199	0.0181861	0.132872
-99	0.0097166	0.112782	0.0181861	0.152047	0.00748714	0.0974199	0.0181861	0.132872
-98	0.0121457	0.108271	0.0181861	0.163743	0.00761736	0.0929294	0.0181861	0.144523
-97	0.0097166	0.108271	0.0181861	0.169591	0.00552153	0.0882106	0.0181861	0.15035
-96	0.0097166	0.0992481	0.0181861	0.19883	0.00657817	0.0749922	0.0181861	0.173182
-95	0.0145749	0.0947368	0.0181861	0.19883	0.00847306	0.0748564	0.0181861	0.166615
-94	0.0194332	0.0992481	0.0181861	0.192982	0.00914299	0.079301	0.0181861	0.160792
-93	0.0267206	0.0902256	0.0181861	0.181287	0.013305	0.0704203	0.0181861	0.149151
-92	0.0364372	0.0902256	0.0181861	0.192982	0.017823	0.0602443	0.0181861	0.148347
-91	0.0412955	0.0857143	0.0238883	0.192982	0.0209668	0.051896	0.0188402	0.148865
-90	0.048583	0.0857143	0.0238883	0.181287	0.0246731	0.051896	0.0188402	0.137334
-89	0.0510121	0.0857143	0.0238883	0.181287	0.0266469	0.051896	0.0188402	0.137334
-88	0.0582996	0.0857143	0.0285445	0.181287	0.0309339	0.0571231	0.020566	0.137334
-87	0.065587	0.0902256	0.0285445	0.175439	0.03548	0.0614153	0.020566	0.124981
-86	0.0704453	0.081203	0.0361642	0.204678	0.0376975	0.0528674	0.0250557	0.136584
-85	0.0753036	0.081203	0.0411379	0.22807	0.0402218	0.0528674	0.0287076	0.142257
-84	0.0825911	0.0766917	0.0439883	0.25731	0.0450213	0.0486577	0.0349345	0.146637
-83	0.0898785	0.081203	0.0338351	0.274854	0.0483496	0.0528674	0.0338351	0.154141
-82	0.0898785	0.0857143	0.0406971	0.280702	0.0483496	0.0571231	0.0406971	0.161746
-81	0.0923077	0.0902256	0.0406971	0.269006	0.0490865	0.0526745	0.0406971	0.151031
-80	0.0995951	0.0857143	0.0438502	0.274854	0.0513005	0.048588	0.0438502	0.146199
-79	0.0995951	0.0857143	0.0522093	0.269006	0.0513005	0.048588	0.0522093	0.141019
-78	0.102024	0.0902256	0.0567127	0.269006	0.0523255	0.0526745	0.0567127	0.137986
-77	0.0995951	0.0857143	0.059856	0.263158	0.0513005	0.051896	0.059856	0.131286
-76	0.102024	0.081203	0.0687248	0.263158	0.0500782	0.0476718	0.0687248	0.12312
-75	0.102024	0.0857143	0.0843082	0.269006	0.0479924	0.051896	0.0747309	0.12357
-74	0.097166	0.0857143	0.103547	0.280702	0.0452935	0.051896	0.0826089	0.130699
-73	0.0898785	0.0721804	0.109733	0.263158	0.0433293	0.0528032	0.0885596	0.115043
-72	0.0923077	0.0676692	0.12289	0.263158	0.0465464	0.0526745	0.0922488	0.100782
-71	0.0923077	0.0676692	0.126498	0.28655	0.047498	0.0526745	0.0955685	0.101963
-70	0.0995951	0.0676692	0.137277	0.309942	0.0525318	0.0526745	0.101734	0.112145
-69	0.102024	0.0631579	0.139425	0.327485	0.0544801	0.0482376	0.103679	0.12305
-68	0.104453	0.0541353	0.150164	0.339181	0.0564658	0.0394146	0.108253	0.128655
-67	0.106883	0.0541353	0.155196	0.321637	0.0598889	0.0394146	0.108606	0.114857
-66	0.109312	0.0586466	0.156319	0.298246	0.0610598	0.0398425	0.108548	0.105628
-65	0.109312	0.0721804	0.157205	0.280702	0.0610598	0.0490742	0.109288	0.106354
-64	0.106883	0.0766917	0.182751	0.269006	0.0585941	0.0533146	0.127145	0.103213
-63	0.109312	0.081203	0.175889	0.263158	0.0600038	0.054198	0.12298	0.0976801
-62	0.111741	0.0631579	0.18526	0.280702	0.0614772	0.0457103	0.130454	0.102297
-61	0.109312	0.0721804	0.182107	0.280702	0.0612689	0.0541353	0.128738	0.102673
-60	0.11417	0.0721804	0.173748	0.304094	0.0661767	0.0541353	0.124461	0.108424
-59	0.11417	0.0766917	0.182541	0.309942	0.0663696	0.0524163	0.134054	0.109014
-58	0.119028	0.0947368	0.179397	0.292398	0.071526	0.0600751	0.132782	0.102339
-57	0.119028	0.112782	0.170529	0.298246	0.075186	0.0656852	0.129538	0.11061
-56	0.119028	0.121805	0.164713	0.304094	0.0790003	0.0658914	0.127658	0.11663
-55	0.119028	0.13985	0.148209	0.304094	0.0790003	0.0741736	0.115801	0.114633
-54	0.116599	0.144361	0.142024	0.321637	0.0775491	0.07607	0.114218	0.120097
-53	0.116599	0.144361	0.135738	0.309942	0.0775491	0.07607	0.112238	0.12481
-52	0.11417	0.144361	0.145484	0.304094	0.0778087	0.07607	0.122378	0.135264
-51	0.109312	0.157895	0.142141	0.292398	0.0741985	0.0776587	0.122446	0.136772
-50	0.102024	0.162406	0.144517	0.269006	0.0691633	0.0771767	0.122775	0.13083
-49	0.097166	0.17594	0.145167	0.263158	0.0658788	0.0823643	0.120691	0.136459
-48	0.0995951	0.189474	0.139302	0.25731	0.0674499	0.0860697	0.11494	0.125425
-47	0.0995951	0.198496	0.133205	0.269006	0.0674499	0.0959111	0.108973	0.126949
-46	0.0995951	0.189474	0.121436	0.263158	0.0674499	0.0919386	0.0975011	0.127721
-45	0.102024	0.189474	0.102161	0.263158	0.0691633	0.0908997	0.0820029	0.128322
-44	0.104453	0.198496	0.113451	0.263158	0.0709184	0.0976286	0.0830888	0.123432
-43	0.106883	0.207519	0.122124	0.245614	0.0724481	0.0988715	0.0817126	0.114035
-42	0.109312	0.221053	0.129587	0.239766	0.0741985	0.101278	0.0825251	0.113056
-41	0.11417	0.221053	0.134373	0.216374	0.0757269	0.101278	0.083394	0.107235
-40	0.158704	0.282707	0.124944	0.222222	0.105872	0.127881	0.0727642	0.106995
-39	0.155466	0.264662	0.13113	0.22807	0.104926	0.12005	0.0748551	0.10921
-38	0.155466	0.252632	0.137245	0.22807	0.104926	0.109489	0.0773542	0.103047
-37	0.155466	0.240602	0.133266	0.222222	0.104926	0.101783	0.0729546	0.0995441
-36	0.165182	0.222556	0.136415	0.216374	0.108972	0.093572	0.074578	0.100186
-35	0.17166	0.222556	0.145648	0.204678	0.113268	0.0931198	0.0806389	0.100569
-34	0.17166	0.222556	0.147386	0.216374	0.113268	0.0931198	0.0769048	0.100186
-33	0.174899	0.216541	0.139162	0.19883	0.115885	0.089285	0.0761817	0.0914882
-32	0.17166	0.210526	0.145922	0.187135	0.113268	0.0871662	0.0782825	0.0907846
-31	0.178138	0.216541	0.141195	0.187135	0.11757	0.0929902	0.0802435	0.0907846
-30	0.178138	0.198496	0.135778	0.181287	0.11757	0.0850655	0.0821078	0.0873286
-29	0.17166	0.192481	0.136352	0.175439	0.113268	0.0794957	0.0888917	0.085947
-28	0.17166	0.186466	0.14205	0.181287	0.114267	0.0722639	0.0944129	0.0765278
-27	0.168421	0.192481	0.14205	0.19883	0.111604	0.0767949	0.0944129	0.0753456
-26	0.168421	0.192481	0.143861	0.192982	0.112718	0.0751278	0.0993291	0.0764719
-25	0.165182	0.180451	0.144421	0.216374	0.11001	0.0691947	0.105184	0.093841
-24	0.158704	0.174436	0.135157	0.216374	0.105764	0.0684059	0.102477	0.093841
-23	0.158704	0.168421	0.130994	0.239766	0.105764	0.0636572	0.0984629	0.0981167
-22	0.145749	0.186466	0.126208	0.251462	0.1003	0.0739956	0.0938647	0.100697
-21	0.148988	0.186466	0.122342	0.239766	0.103094	0.0784265	0.0901636	0.100824
-20	0.182186	0.240602	0.116156	0.239766	0.123808	0.0987036	0.0842737	0.0977238
-19	0.178138	0.225564	0.11004	0.233918	0.120452	0.0916759	0.0784954	0.0977238
-18	0.17004	0.218045	0.110145	0.22807	0.115118	0.0862753	0.0729787	0.0944766
-17	0.157895	0.233083	0.104261	0.233918	0.108911	0.0895968	0.0675456	0.0932927
-16	0.153846	0.240602	0.104879	0.233918	0.105678	0.095304	0.0603903	0.0941139
-15	0.145749	0.24812	0.0973486	0.245614	0.0993898	0.0945098	0.0558154	0.10921
-14	0.137652	0.263158	0.0959384	0.245614	0.0933811	0.0974547	0.0545942	0.10921
-13	0.137652	0.240602	0.0817434	0.251462	0.0931907	0.0881123	0.0503228	0.109483
-12	0.129555	0.240602	0.0841984	0.280702	0.0879111	0.0835004	0.0499973	0.120275
-11	0.125506	0.24812	0.078227	0.274854	0.0854369	0.0864934	0.0456158	0.117615
-10	0.121457	0.240602	0.0832698	0.269006	0.0830864	0.0835004	0.0491976	0.116189
-9	0.11336	0.263158	0.0916867	0.274854	0.0788002	0.0812123	0.0561725	0.114968
-8	0.105263	0.278195	0.0974457	0.269006	0.0734718	0.0825928	0.0590742	0.102464
-7	0.0931174	0.270677	0.0963626	0.280702	0.0664017	0.0774108	0.0593986	0.0992431
-6	0.0890688	0.263158	0.0884976	0.274854	0.060886	0.0735409	0.0576968	0.0987681
-5	0.0850202	0.255639	0.0862035	0.309942	0.0573271	0.0702649	0.0607966	0.106515
-4	0.0769231	0.240602	0.0880483	0.309942	0.0521623	0.0687741	0.0618226	0.104325
-3	0.0850202	0.233083	0.0971055	0.327485	0.0517944	0.0668285	0.0673682	0.105547
-2	0.0850202	0.233083	0.103646	0.350877	0.047875	0.0697265	0.0673086	0.115043
-1	0.105263	0.240602	0.103646	0.380117	0.0498595	0.0734126	0.0673086	0.11663
0	0.117409	0.263158	0.108911	0.426901	0.0530194	0.0753132	0.0708487	0.137707
1	0.1417	0.278195	0.115526	0.473684	0.0628944	0.0776538	0.0754412	0.14573
2	0.165992	0.263158	0.128557	0.502924	0.0748714	0.0744323	0.0844114	0.163664
3	0.186235	0.255639	0.123276	0.54386	0.0854529	0.0756876	0.0813966	0.177835
4	0.202429	0.270677	0.121423	0.584795	0.0932493	0.0790964	0.0816257	0.183257
5	0.222672	0.278195	0.127139	0.672515	0.105458	0.0833875	0.0846348	0.199603
6	0.242915	0.300752	0.138185	0.760234	0.115331	0.0809799	0.0912776	0.225032
7	0.263158	0.330827	0.137374	0.812866	0.124578	0.0894916	0.0907603	0.242479
8	0.279352	0.345865	0.149238	0.877193	0.13304	0.0939097	0.0987356	0.262719
9	0.295547	0.360902	0.149726	0.994152	0.141594	0.0977444	0.0991489	0.2948
10	0.311741	0.353383	0.144011	1.06433	0.149752	0.101248	0.0951188	0.319035
11	0.336032	0.360902	0.161873	1.16374	0.163045	0.101712	0.100007	0.352348
12	0.360324	0.398496	0.164139	1.26316	0.173523	0.108871	0.102259	0.382158
13	0.380567	0.421053	0.172921	1.32749	0.185522	0.117126	0.109298	0.398305
14	0.408907	0.458647	0.175613	1.40936	0.196221	0.127228	0.113701	0.42657
15	0.425101	0.503759	0.182955	1.47953	0.201252	0.138708	0.12143	0.441085
16	0.433198	0.503759	0.191717	1.55556	0.211129	0.139182	0.127922	0.458841
17	0.433198	0.503759	0.205433	1.64912	0.209609	0.140597	0.13821	0.477486
18	0.421053	0.496241	0.220874	1.71345	0.209935	0.141997	0.148516	0.498699
19	0.425101	0.488722	0.233104	1.77778	0.210565	0.142395	0.158385	0.503204
20	0.433198	0.503759	0.241921	1.83041	0.210371	0.145212	0.161689	0.518641
21	0.433198	0.541353	0.255805	1.89474	0.204203	0.156937	0.165562	0.524998
22	0.42915	0.56391	0.276955	1.95322	0.19978	0.164729	0.177189	0.539844
23	0.45749	0.556391	0.296211	1.99415	0.206815	0.157417	0.188389	0.546784
24	0.453441	0.541353	0.310112	2.05848	0.201435	0.152677	0.193939	0.56205
25	0.45749	0.548872	0.325454	2.08772	0.199205	0.155308	0.19799	0.561198
26	0.45749	0.526316	0.357231	2.11696	0.196693	0.153231	0.205634	0.560497
27	0.461538	0.541353	0.372171	2.21637	0.194767	0.153967	0.211235	0.575311
28	0.45749	0.556391	0.397709	2.23392	0.188582	0.159911	0.217452	0.579553
29	0.45749	0.548872	0.419089	2.24561	0.188582	0.164385	0.225322	0.575882
30	0.449393	0.556391	0.42485	2.24561	0.181405	0.160734	0.22544	0.580076
31	0.453441	0.533835	0.449493	2.25731	0.178635	0.161785	0.23156	0.588337
32	0.441296	0.533835	0.471884	2.28655	0.172979	0.163004	0.237946	0.598237
33	0.441296	0.503759	0.508046	2.28655	0.169767	0.154456	0.248074	0.608567
34	0.437247	0.458647	0.532799	2.32749	0.169332	0.150939	0.256719	0.615773
35	0.441296	0.466165	0.554551	2.32749	0.168085	0.149937	0.262715	0.619697
36	0.441296	0.473684	0.572537	2.32749	0.1666	0.150188	0.271765	0.623658
37	0.445344	0.473684	0.592625	2.35088	0.169461	0.150188	0.279583	0.623856
38	0.445344	0.496241	0.611607	2.36257	0.169146	0.159498	0.286602	0.632154
39	0.437247	0.541353	0.634033	2.38012	0.167115	0.167901	0.292647	0.634604
40	0.433198	0.533835	0.640644	2.43275	0.16398	0.167001	0.296425	0.656184
41	0.421053	0.541353	0.650612	2.4386	0.16046	0.174451	0.301444	0.65261
42	0.392713	0.56391	0.664982	2.45614	0.154095	0.194813	0.30632	0.662673
43	0.404858	0.578947	0.670536	2.45614	0.156923	0.208005	0.310578	0.672871
44	0.40081	0.586466	0.674462	2.4269	0.157505	0.216832	0.314857	0.673582
45	0.404858	0.571429	0.670991	2.4386	0.158835	0.218045	0.312626	0.680206
46	0.404858	0.571429	0.675539	2.37427	0.156242	0.224013	0.317806	0.672953
47	0.408907	0.548872	0.667678	2.36842	0.159144	0.215743	0.316452	0.679074
48	0.421053	0.556391	0.668625	2.36842	0.162221	0.22619	0.320164	0.684716
49	0.421053	0.541353	0.670276	2.36842	0.163095	0.226148	0.321049	0.685559
50	0.412955	0.548872	0.684045	2.35673	0.161216	0.228222	0.320948	0.685602
51	0.42915	0.548872	0.693516	2.37427	0.163187	0.22355	0.320911	0.692952
52	0.42915	0.556391	0.6852	2.38012	0.166846	0.216962	0.320132	0.696072
53	0.437247	0.556391	0.684352	2.34503	0.169437	0.212353	0.31935	0.696643
54	0.437247	0.533835	0.683403	2.33918	0.170065	0.21222	0.32063	0.697967
55	0.445344	0.518797	0.6804	2.32749	0.173397	0.207824	0.320879	0.706224
56	0.445344	0.526316	0.675916	2.31579	0.17144	0.211776	0.321457	0.714253
57	0.445344	0.511278	0.671299	2.2807	0.172987	0.197836	0.322522	0.706835
58	0.461538	0.43609	0.663683	2.26316	0.1774	0.167114	0.323052	0.709985
59	0.449393	0.421053	0.662042	2.20468	0.17144	0.167226	0.323657	0.688887
60	0.461538	0.398496	0.659377	2.20468	0.173042	0.157417	0.325038	0.694394
61	0.45749	0.390977	0.654098	2.18713	0.17069	0.145212	0.326905	0.691043
62	0.441296	0.406015	0.665041	2.15205	0.163262	0.144692	0.329269	0.677625
63	0.437247	0.383459	0.668985	2.16959	0.162045	0.136724	0.329237	0.679741
64	0.433198	0.406015	0.672913	2.16959	0.160809	0.143778	0.33261	0.671255
65	0.42915	0.390977	0.675265	2.19298	0.158998	0.136793	0.33391	0.671554
66	0.425101	0.398496	0.680898	2.18129	0.160179	0.137274	0.335767	0.660236
67	0.412955	0.383459	0.68361	2.20468	0.156067	0.127746	0.337278	0.658622
68	0.421053	0.360902	0.692626	2.22222	0.158232	0.12178	0.338661	0.653481
69	0.425101	0.330827	0.676936	2.22807	0.162709	0.110589	0.338853	0.650425
70	0.417004	0.308271	0.67404	2.21637	0.159513	0.10739	0.340734	0.640738
71	0.412955	0.300752	0.673655	2.21053	0.158214	0.10571	0.340655	0.627116
72	0.412955	0.323308	0.674676	2.22222	0.156862	0.120144	0.338155	0.627103
73	0.412955	0.345865	0.671324	2.23392	0.156862	0.11983	0.338205	0.628288
74	0.421053	0.345865	0.674604	2.21637	0.162002	0.11983	0.338389	0.622896
75	0.433198	0.323308	0.677409	2.22807	0.166132	0.108611	0.339973	0.622992
76	0.433198	0.315789	0.679068	2.25731	0.164197	0.100125	0.340926	0.625854
77	0.412955	0.323308	0.675368	2.2807	0.159556	0.108002	0.341802	0.630665
78	0.421053	0.308271	0.673868	2.28655	0.167499	0.106154	0.340964	0.631586
79	0.417004	0.300752	0.686963	2.28655	0.169759	0.105084	0.340346	0.627123
80	0.421053	0.278195	0.684508	2.2807	0.173129	0.102543	0.339122	0.622189
81	0.425101	0.24812	0.684882	2.2924	0.175418	0.107565	0.337429	0.622443
82	0.412955	0.24812	0.686675	2.30994	0.173113	0.118087	0.337515	0.632093
83	0.40081	0.233083	0.689659	2.2924	0.168191	0.104545	0.335986	0.626079
84	0.40081	0.233083	0.69833	2.2807	0.168613	0.100688	0.333311	0.626932
85	0.396761	0.225564	0.703195	2.26901	0.167458	0.105084	0.330939	0.629593
86	0.392713	0.240602	0.71606	2.26316	0.16714	0.132382	0.329272	0.62595
87	0.384615	0.24812	0.730098	2.25731	0.162482	0.141465	0.327353	0.625854
88	0.37247	0.255639	0.727826	2.23392	0.157384	0.148611	0.32637	0.621701
89	0.368421	0.255639	0.716865	2.25731	0.157331	0.148611	0.323397	0.624746
90	0.364372	0.24812	0.708726	2.27485	0.157045	0.141465	0.321708	0.624397
91	0.356275	0.218045	0.717327	2.27485	0.155075	0.127598	0.32417	0.620813
92	0.340081	0.195489	0.718344	2.2924	0.148819	0.128774	0.323315	0.624048
93	0.323887	0.210526	0.720356	2.33918	0.144242	0.136379	0.32145	0.628349
94	0.311741	0.225564	0.7227	2.32749	0.144563	0.144236	0.317362	0.620875
95	0.303644	0.218045	0.733174	2.33333	0.142047	0.145471	0.315543	0.629993
96	0.299595	0.203008	0.74998	2.35088	0.142076	0.131167	0.312804	0.625458
97	0.291498	0.210526	0.773584	2.39766	0.13971	0.129431	0.313516	0.631464
98	0.299595	0.218045	0.759354	2.43275	0.141826	0.136586	0.309064	0.635331
99	0.291498	0.225564	0.770244	2.45614	0.139964	0.143778	0.308554	0.625704
100	0.295547	0.240602	0.767416	2.44444	0.139446	0.158252	0.307656	0.617416
101	0.299595	0.233083	0.770075	2.40936	0.1417	0.158252	0.304048	0.600719
102	0.303644	0.240602	0.770408	2.40936	0.143786	0.151001	0.300812	0.59828
103	0.295547	0.255639	0.770776	2.42105	0.139701	0.174343	0.299094	0.589745
104	0.303644	0.24812	0.776175	2.4386	0.145749	0.167114	0.299558	0.577017
105	0.303644	0.225564	0.782403	2.4269	0.144033	0.139115	0.30006	0.570273
106	0.299595	0.233083	0.778266	2.42105	0.143691	0.152738	0.298851	0.560169
107	0.303644	0.225564	0.785996	2.4386	0.148883	0.145601	0.298581	0.560169
108	0.295547	0.233083	0.806327	2.39181	0.146282	0.143843	0.299141	0.548446
109	0.291498	0.263158	0.824929	2.35673	0.1475	0.148865	0.298273	0.554007
110	0.307692	0.285714	0.811782	2.34503	0.153197	0.154882	0.295999	0.548517
111	0.315789	0.315789	0.820519	2.31579	0.159573	0.162018	0.294535	0.539456
112	0.311741	0.338346	0.814346	2.29825	0.16029	0.164385	0.291221	0.531046
113	0.311741	0.345865	0.819069	2.32749	0.167442	0.162367	0.288284	0.532838
114	0.311741	0.37594	0.819234	2.33333	0.174097	0.168964	0.28305	0.525218
115	0.327935	0.398496	0.831466	2.30994	0.180575	0.174505	0.284126	0.530571
116	0.336032	0.413534	0.81785	2.2807	0.188408	0.193356	0.280896	0.52595
117	0.327935	0.428571	0.82907	2.25731	0.184851	0.193356	0.281596	0.533752
118	0.319838	0.428571	0.840487	2.25146	0.18324	0.184274	0.282626	0.552477
119	0.307692	0.421053	0.839999	2.26901	0.181623	0.177556	0.28532	0.545798
120	0.307692	0.451128	0.848161	2.30409	0.18434	0.191447	0.288743	0.536077
121	0.303644	0.443609	0.863515	2.32164	0.187047	0.199213	0.291911	0.532164
122	0.311741	0.421053	0.875886	2.33918	0.193331	0.195922	0.29555	0.525885
123	0.303644	0.421053	0.869821	2.33918	0.184755	0.195922	0.296536	0.525226
124	0.303644	0.43609	0.866456	2.35088	0.179786	0.204718	0.296158	0.516577
125	0.311741	0.43609	0.867985	2.38012	0.186791	0.20147	0.29621	0.507923
126	0.311741	0.466165	0.882504	2.38012	0.194613	0.221347	0.29571	0.496198
127	0.315789	0.481203	0.895576	2.4152	0.198546	0.224895	0.296986	0.480734
128	0.299595	0.481203	0.903318	2.47953	0.186594	0.222239	0.298609	0.456684
129	0.283401	0.466165	0.936907	2.49708	0.182665	0.207506	0.300953	0.447034
130	0.271255	0.451128	0.942417	2.54971	0.174848	0.204441	0.300931	0.433311
131	0.271255	0.428571	0.953335	2.5848	0.170634	0.190954	0.304592	0.426991
132	0.259109	0.413534	0.954077	2.5731	0.158843	0.181025	0.305712	0.410733
133	0.251012	0.398496	0.970787	2.59649	0.155075	0.169909	0.309006	0.403985
134	0.230769	0.398496	0.955666	2.64327	0.148331	0.173748	0.309635	0.383141
135	0.214575	0.406015	0.969816	2.67251	0.141334	0.164328	0.313369	0.365462
136	0.202429	0.413534	0.970208	2.70175	0.141507	0.160558	0.315643	0.341317
137	0.214575	0.406015	0.958402	2.7193	0.149039	0.157775	0.316617	0.321345
138	0.218623	0.398496	0.988484	2.72515	0.152267	0.154456	0.31965	0.316249
139	0.214575	0.368421	0.984677	2.75439	0.148322	0.139723	0.317443	0.320386
140	0.210526	0.37594	0.971291	2.80117	0.140013	0.145924	0.314565	0.324416
141	0.198381	0.37594	0.969345	2.81287	0.135259	0.142262	0.313841	0.332537
142	0.202429	0.37594	0.967643	2.8538	0.138463	0.140396	0.312353	0.325955
143	0.194332	0.360902	0.963667	2.90643	0.147111	0.132666	0.307795	0.336181
144	0.182186	0.360902	0.959581	2.93567	0.13971	0.144562	0.309282	0.327015
145	0.178138	0.353383	0.966021	2.97661	0.131854	0.141465	0.311455	0.335302
146	0.182186	0.345865	0.950611	3.02924	0.132133	0.142461	0.309218	0.33219
147	0.190283	0.338346	0.950167	3.04094	0.136486	0.137274	0.309723	0.34163
148	0.186235	0.338346	0.93347	3.08772	0.137404	0.139655	0.311796	0.330086
149	0.198381	0.330827	0.92651	3.08187	0.145871	0.140998	0.309581	0.347363
150	0.202429	0.338346	0.935524	3.08772	0.146562	0.147018	0.305631	0.345797
151	0.210526	0.353383	0.948304	3.11111	0.151231	0.146954	0.307772	0.349388
152	0.214575	0.330827	0.936719	3.1345	0.152105	0.14053	0.3078	0.351984
153	0.210526	0.323308	0.94774	3.15205	0.152518	0.13464	0.310592	0.350487
154	0.218623	0.293233	0.947901	3.15205	0.154581	0.115913	0.311798	0.361298
155	0.226721	0.263158	0.963844	3.16374	0.159504	0.111353	0.314522	0.371794
156	0.222672	0.278195	0.978601	3.19298	0.155647	0.1164	0.318996	0.377804
157	0.226721	0.300752	0.971349	3.23392	0.156923	0.116965	0.320261	0.370723
158	0.222672	0.300752	0.982021	3.23977	0.153232	0.118087	0.324738	0.365813
159	0.226721	0.308271	0.993433	3.2807	0.156923	0.124458	0.329118	0.349449
160	0.230769	0.315789	0.990441	3.29825	0.158292	0.123165	0.332928	0.342892
161	0.222672	0.323308	1.0026	3.29825	0.153232	0.136586	0.338157	0.349229
162	0.222672	0.323308	1.01937	3.28655	0.151014	0.138979	0.345348	0.350451
163	0.218623	0.323308	1.03145	3.25146	0.14956	0.132168	0.351509	0.359946
164	0.218623	0.323308	1.0306	3.26316	0.14956	0.123394	0.355074	0.358685
165	0.210526	0.315789	1.03484	3.22807	0.142278	0.126337	0.356185	0.37872
166	0.210526	0.300752	1.03696	3.21053	0.142278	0.124079	0.357805	0.390917
167	0.206478	0.300752	1.03862	3.19298	0.13867	0.129285	0.356634	0.41041
168	0.202429	0.315789	1.04505	3.22807	0.135088	0.127377	0.359362	0.409566
169	0.198381	0.300752	1.04134	3.23977	0.135522	0.123546	0.364022	0.407787
170	0.202429	0.285714	1.03863	3.22807	0.137304	0.115343	0.363756	0.420138
171	0.206478	0.285714	1.04212	3.22222	0.140956	0.115343	0.365297	0.422036
172	0.214575	0.278195	1.03785	3.19298	0.14603	0.114111	0.365006	0.444262
173	0.222672	0.308271	1.04553	3.18129	0.151132	0.12178	0.368028	0.441927
174	0.230769	0.315789	1.03092	3.19883	0.158404	0.113697	0.367543	0.42819
175	0.230769	0.308271	1.01855	3.20468	0.16239	0.114523	0.364595	0.429685
176	0.226721	0.293233	1.0045	3.18129	0.16281	0.107653	0.361925	0.437113
177	0.238866	0.323308	1.00474	3.15789	0.173909	0.116238	0.361912	0.446163
178	0.242915	0.323308	1.00773	3.10526	0.177639	0.104274	0.362505	0.467635
179	0.251012	0.323308	1.01728	3.08772	0.180968	0.110418	0.364795	0.45858
180	0.259109	0.315789	1.01892	3.08187	0.187076	0.101434	0.365096	0.459762
181	0.275304	0.315789	1.01706	3.06433	0.198291	0.105263	0.367014	0.453669
182	0.287449	0.315789	1.00964	3.08187	0.201882	0.114852	0.365763	0.458337
183	0.299595	0.323308	1.00611	3.11696	0.205782	0.13464	0.364836	0.461572
184	0.311741	0.315789	0.999899	3.15789	0.212997	0.128921	0.363896	0.45555
185	0.327935	0.323308	0.991347	3.15789	0.221312	0.137068	0.360213	0.460088
186	0.340081	0.323308	0.99502	3.15789	0.225954	0.143646	0.36335	0.467964
187	0.34413	0.308271	0.994592	3.12866	0.22985	0.148167	0.36496	0.467315
188	0.352227	0.300752	0.993458	3.11696	0.230064	0.146053	0.367848	0.474478
189	0.356275	0.315789	0.992479	3.11696	0.230663	0.148865	0.369033	0.472772
190	0.360324	0.330827	0.99587	3.11111	0.231408	0.152244	0.372302	0.477119
191	0.360324	0.330827	0.995597	3.10526	0.228861	0.153967	0.374426	0.473928
192	0.368421	0.315789	0.993113	3.09357	0.234923	0.145277	0.375979	0.467205
193	0.356275	0.315789	1.00659	3.04678	0.22725	0.140664	0.379314	0.479211
194	0.352227	0.330827	1.0222	2.9883	0.223566	0.145147	0.382733	0.48012
195	0.348178	0.330827	1.03066	2.9883	0.22334	0.142395	0.382149	0.482518
196	0.352227	0.308271	1.0248	2.98246	0.21883	0.133163	0.379965	0.478693
197	0.352227	0.293233	1.02496	2.97661	0.218423	0.139182	0.380345	0.485803
198	0.352227	0.293233	1.02016	2.97661	0.21964	0.138708	0.379337	0.495293
199	0.356275	0.300752	1.02191	3	0.220991	0.140998	0.381186	0.496138
200	0.352227	0.323308	1.00643	3	0.22101	0.151686	0.377201	0.50998
201	0.348178	0.315789	1.00097	2.97661	0.222064	0.150626	0.374617	0.514869
202	0.340081	0.300752	1.00171	2.91228	0.220948	0.137205	0.373482	0.517172
203	0.336032	0.300752	1.00801	2.88889	0.219814	0.141931	0.375151	0.517131
204	0.331984	0.300752	1.00611	2.87134	0.215724	0.127746	0.377075	0.510969
205	0.327935	0.308271	0.999979	2.88889	0.220347	0.122858	0.374585	0.512122
206	0.323887	0.338346	0.994162	2.90058	0.219515	0.120926	0.369876	0.49493
207	0.323887	0.368421	0.991815	2.92398	0.223444	0.125288	0.368883	0.487305
208	0.327935	0.360902	0.993945	2.96491	0.227328	0.116804	0.369873	0.493728
209	0.319838	0.383459	0.987296	2.95906	0.226962	0.121934	0.368582	0.499444
210	0.323887	0.413534	0.980891	2.99415	0.23087	0.13415	0.365261	0.493918
211	0.307692	0.398496	0.976402	3.02924	0.229559	0.131382	0.364102	0.483819
212	0.311741	0.421053	0.986547	3.05848	0.233517	0.140664	0.363132	0.485354
213	0.315789	0.413534	0.992723	3.14035	0.23333	0.140396	0.363593	0.483253
214	0.315789	0.421053	0.989582	3.15789	0.23333	0.146182	0.364485	0.479898
215	0.307692	0.421053	0.987519	3.18129	0.230485	0.153231	0.36639	0.483898
216	0.299595	0.428571	0.980845	3.19883	0.226799	0.162599	0.36598	0.48196
217	0.295547	0.428571	0.976913	3.20468	0.226262	0.159734	0.362682	0.488435
218	0.283401	0.443609	0.981964	3.20468	0.221423	0.169909	0.362653	0.502337
219	0.271255	0.428571	0.984275	3.22222	0.213112	0.167789	0.362221	0.507316
220	0.275304	0.428571	0.984047	3.25146	0.213471	0.17585	0.361667	0.500598
221	0.267206	0.458647	0.984371	3.26901	0.209127	0.185447	0.363209	0.501187
222	0.267206	0.496241	0.989325	3.25731	0.204924	0.196546	0.364164	0.501801
223	0.259109	0.488722	1.00175	3.26316	0.208617	0.197836	0.367079	0.509225
224	0.255061	0.473684	1.01502	3.27485	0.200844	0.197598	0.371338	0.50198
225	0.255061	0.458647	1.02932	3.26901	0.197186	0.20147	0.37803	0.518617
226	0.246964	0.43609	1.04308	3.25731	0.193508	0.190707	0.381543	0.517131
227	0.230769	0.443609	1.045	3.22222	0.182665	0.180816	0.381691	0.516187
228	0.230769	0.428571	1.0478	3.23392	0.182665	0.166605	0.38218	0.527127
229	0.226721	0.406015	1.0621	3.25146	0.177223	0.151375	0.385614	0.527832
230	0.218623	0.428571	1.05982	3.23977	0.169276	0.154273	0.384689	0.53279
231	0.218623	0.406015	1.04807	3.25146	0.165778	0.144692	0.384745	0.523367
232	0.226721	0.413534	1.03798	3.23977	0.170273	0.143187	0.384683	0.520813
233	0.226721	0.406015	1.03873	3.23977	0.167009	0.135269	0.384659	0.516063
234	0.218623	0.398496	1.04352	3.27485	0.162423	0.129358	0.385025	0.499367
235	0.226721	0.421053	1.04847	3.32749	0.167009	0.140664	0.38584	0.486489
236	0.218623	0.43609	1.04793	3.33918	0.162423	0.147848	0.388955	0.482385
237	0.226721	0.413534	1.04845	3.33333	0.163897	0.142725	0.386011	0.482695
238	0.234818	0.406015	1.05979	3.35088	0.168621	0.142395	0.390262	0.479817
239	0.242915	0.428571	1.07297	3.34503	0.166706	0.1547	0.392724	0.486119
240	0.251012	0.406015	1.072	3.34503	0.169098	0.149181	0.392491	0.48896
241	0.255061	0.398496	1.07799	3.31579	0.174238	0.154882	0.39053	0.478452
242	0.255061	0.443609	1.07536	3.35088	0.174238	0.171455	0.38781	0.481338
243	0.255061	0.451128	1.07116	3.34503	0.176667	0.172223	0.383457	0.479345
244	0.259109	0.443609	1.07064	3.35673	0.180408	0.172987	0.379773	0.490427
245	0.259109	0.466165	1.06521	3.35088	0.180408	0.177344	0.375695	0.496603
246	0.271255	0.466165	1.06603	3.37427	0.189095	0.182114	0.374499	0.48741
247	0.271255	0.458647	1.06099	3.38596	0.186638	0.184734	0.371526	0.480058
248	0.271255	0.458647	1.05211	3.35088	0.192354	0.172168	0.368557	0.474577
249	0.283401	0.473684	1.05098	3.38012	0.196978	0.174181	0.366962	0.475207
250	0.295547	0.488722	1.04704	3.37427	0.197788	0.179666	0.365341	0.48464
251	0.283401	0.473684	1.05363	3.35673	0.192971	0.178667	0.366216	0.483235
252	0.279352	0.466165	1.05496	3.36842	0.191571	0.174343	0.364919	0.485635
253	0.287449	0.481203	1.06485	3.35088	0.198958	0.18852	0.367047	0.499384
254	0.279352	0.458647	1.06778	3.33333	0.193966	0.184734	0.366838	0.510508
255	0.279352	0.443609	1.08035	3.33333	0.193966	0.182992	0.369303	0.512013
256	0.275304	0.466165	1.08602	3.32164	0.192751	0.183557	0.371236	0.510994
257	0.271255	0.488722	1.09291	3.2924	0.191614	0.182579	0.369859	0.506583
258	0.259109	0.481203	1.10219	3.29825	0.192872	0.178456	0.371504	0.500231
259	0.255061	0.496241	1.11111	3.33918	0.195286	0.174505	0.372185	0.501698
260	0.246964	0.473684	1.12177	3.35088	0.194149	0.171125	0.372517	0.506042
261	0.255061	0.451128	1.12639	3.34503	0.197815	0.169521	0.373792	0.504757
262	0.259109	0.458647	1.13165	3.35673	0.197601	0.168293	0.375932	0.508453
263	0.267206	0.458647	1.13256	3.35673	0.200987	0.168293	0.377625	0.502439
264	0.271255	0.481203	1.1348	3.36257	0.204697	0.178456	0.37817	0.501571
265	0.271255	0.488722	1.14153	3.33918	0.20461	0.172932	0.379167	0.504528
266	0.283401	0.511278	1.16137	3.29825	0.21292	0.177821	0.383606	0.50169
267	0.287449	0.548872	1.17192	3.30409	0.213675	0.198217	0.385814	0.494412
268	0.291498	0.526316	1.17557	3.26901	0.22247	0.198597	0.387661	0.488986
269	0.287449	0.533835	1.1813	3.24561	0.227755	0.197407	0.388184	0.475387
270	0.299595	0.533835	1.18367	3.24561	0.236233	0.196066	0.38522	0.472546
271	0.303644	0.548872	1.19654	3.21637	0.240167	0.203147	0.388482	0.467836
272	0.303644	0.56391	1.19392	3.23392	0.240167	0.197836	0.387344	0.460431
273	0.307692	0.56391	1.1914	3.19883	0.244104	0.197836	0.386155	0.464894
274	0.323887	0.56391	1.18326	3.21637	0.251344	0.197168	0.384998	0.459036
275	0.323887	0.541353	1.1766	3.23392	0.255548	0.199496	0.383765	0.458841
276	0.319838	0.541353	1.1919	3.26901	0.251599	0.192085	0.384011	0.461127
277	0.319838	0.526316	1.19054	3.26316	0.251599	0.184479	0.383515	0.454873
278	0.319838	0.526316	1.19454	3.26901	0.247328	0.189069	0.384949	0.431205
279	0.323887	0.533835	1.19158	3.26316	0.247069	0.182114	0.382585	0.429825
280	0.323887	0.518797	1.19207	3.24561	0.242132	0.182114	0.382636	0.420778
281	0.315789	0.518797	1.20318	3.19883	0.237703	0.181025	0.380432	0.411606
282	0.303644	0.518797	1.22759	3.19883	0.228575	0.178456	0.379056	0.412913
283	0.299595	0.488722	1.23587	3.16374	0.228282	0.170242	0.38036	0.413533
284	0.287449	0.466165	1.24282	3.15205	0.224298	0.161377	0.380909	0.409701
285	0.271255	0.43609	1.25132	3.1462	0.216009	0.142395	0.377039	0.409169
286	0.259109	0.398496	1.26766	3.1345	0.211994	0.137274	0.3752	0.400168
287	0.251012	0.398496	1.28197	3.1462	0.204029	0.136793	0.374477	0.390994
288	0.242915	0.37594	1.29827	3.17544	0.204497	0.122858	0.374192	0.40035
289	0.230769	0.37594	1.29261	3.15789	0.196798	0.121237	0.372511	0.40131
290	0.226721	0.353383	1.30606	3.18129	0.192772	0.115261	0.371427	0.400265
291	0.226721	0.315789	1.32389	3.14035	0.188393	0.110759	0.374159	0.404271
292	0.218623	0.308271	1.32706	3.11696	0.180348	0.112782	0.372622	0.402724
293	0.210526	0.300752	1.33276	3.08187	0.176179	0.109389	0.372731	0.402756
294	0.210526	0.315789	1.34446	3.09942	0.171894	0.118803	0.371298	0.391846
295	0.218623	0.285714	1.32991	3.07018	0.17576	0.108871	0.3707	0.394834
296	0.222672	0.285714	1.3349	3.07602	0.171703	0.111268	0.36978	0.394748
297	0.226721	0.255639	1.34216	3.04094	0.17214	0.10739	0.36844	0.401097
298	0.218623	0.255639	1.34319	3.07018	0.168329	0.101712	0.373238	0.385167
299	0.214575	0.240602	1.34207	3.07602	0.165844	0.0987036	0.374122	0.395429
300	0.222672	0.225564	1.33532	3.10526	0.170353	0.0958954	0.373323	0.39958
301	0.226721	0.225564	1.32674	3.08772	0.17214	0.0952051	0.373631	0.40198
302	0.230769	0.210526	1.33301	3.12866	0.170081	0.0933058	0.377424	0.395137
303	0.246964	0.210526	1.34654	3.16374	0.175713	0.0994643	0.382035	0.380993
304	0.246964	0.203008	1.34252	3.21637	0.175713	0.0990847	0.386146	0.379374
305	0.242915	0.195489	1.34253	3.21637	0.17195	0.100595	0.384925	0.373033
306	0.238866	0.210526	1.35426	3.20468	0.172267	0.109561	0.387807	0.363633
307	0.238866	0.218045	1.35301	3.15789	0.169775	0.111606	0.392676	0.348236
308	0.234818	0.24812	1.36618	3.18713	0.166074	0.129285	0.397312	0.336105
309	0.234818	0.278195	1.3637	3.1462	0.166074	0.150939	0.398117	0.342193
310	0.230769	0.308271	1.35788	3.15789	0.166493	0.162192	0.398947	0.333564
311	0.234818	0.308271	1.371	3.14035	0.170193	0.155974	0.402483	0.326453
312	0.230769	0.323308	1.37755	3.1345	0.162499	0.164614	0.405019	0.319678
313	0.226721	0.308271	1.36855	3.08187	0.158835	0.158906	0.405039	0.319316
314	0.210526	0.338346	1.37005	3.09357	0.146459	0.167564	0.402587	0.320359
315	0.206478	0.353383	1.37672	3.07602	0.14333	0.176331	0.400341	0.320999
316	0.194332	0.37594	1.38166	3.04678	0.137244	0.18641	0.39875	0.319357
317	0.206478	0.383459	1.38605	3.05848	0.144563	0.192771	0.398457	0.321398
318	0.206478	0.390977	1.39192	3.07018	0.142584	0.198217	0.397611	0.293696
319	0.202429	0.428571	1.39662	3.04678	0.13782	0.211286	0.397544	0.297269
320	0.194332	0.421053	1.38912	3.06433	0.136726	0.216397	0.394852	0.293536
321	0.206478	0.458647	1.39485	3.01754	0.1379	0.232476	0.394235	0.304501
322	0.198381	0.481203	1.38163	3	0.135784	0.248576	0.392668	0.296174
323	0.214575	0.541353	1.36549	2.94152	0.140451	0.273413	0.389074	0.300231
324	0.238866	0.571429	1.35572	2.95322	0.153748	0.279547	0.394192	0.316209
325	0.246964	0.556391	1.33179	2.93567	0.157262	0.278229	0.391964	0.314542
326	0.255061	0.541353	1.33577	2.95322	0.163404	0.263587	0.39107	0.309693
327	0.263158	0.518797	1.33793	2.90058	0.170024	0.254086	0.391751	0.319236
328	0.271255	0.556391	1.32967	2.94152	0.16959	0.262369	0.392796	0.312414
329	0.279352	0.556391	1.33228	2.92982	0.172861	0.259335	0.394492	0.312852
330	0.287449	0.578947	1.32222	2.99415	0.176241	0.262907	0.392374	0.323546
331	0.295547	0.571429	1.32649	3.01754	0.183538	0.254346	0.390605	0.320145
332	0.295547	0.571429	1.33274	3.04678	0.187463	0.254086	0.389474	0.329087
333	0.311741	0.548872	1.35007	3.0117	0.19805	0.240602	0.391961	0.323347
334	0.319838	0.548872	1.33805	2.98246	0.199746	0.234493	0.388882	0.326688
335	0.327935	0.556391	1.31248	2.93567	0.202894	0.242513	0.387683	0.333769
336	0.311741	0.548872	1.29117	2.90058	0.190742	0.240602	0.387319	0.340577
337	0.311741	0.571429	1.28417	2.88304	0.19516	0.255381	0.388036	0.35162
338	0.307692	0.578947	1.27277	2.88304	0.194922	0.270572	0.385293	0.351291
339	0.311741	0.601504	1.2842	2.8655	0.194613	0.280825	0.384689	0.348579
340	0.307692	0.593985	1.27	2.89474	0.186161	0.28313	0.382524	0.351316
341	0.303644	0.601504	1.26679	2.8538	0.180869	0.27894	0.378383	0.367561
342	0.291498	0.578947	1.29023	2.8538	0.172267	0.272999	0.382376	0.38133
343	0.279352	0.593985	1.29768	2.81287	0.164761	0.284525	0.38183	0.385278
344	0.271255	0.601504	1.30615	2.81871	0.161876	0.280355	0.384504	0.403138
345	0.271255	0.646617	1.30838	2.81287	0.165456	0.30424	0.383768	0.415729
346	0.271255	0.669173	1.30651	2.80117	0.160222	0.313424	0.384308	0.443289
347	0.263158	0.601504	1.31102	2.76023	0.158232	0.292558	0.384045	0.461516
348	0.251012	0.578947	1.30674	2.74854	0.150189	0.281796	0.380834	0.480521
349	0.242915	0.56391	1.31599	2.69591	0.14172	0.278669	0.380052	0.488068
350	0.234818	0.571429	1.32447	2.64327	0.136366	0.287686	0.378869	0.501673
351	0.230769	0.593985	1.32643	2.59064	0.132793	0.307689	0.378884	0.50152
352	0.226721	0.593985	1.3228	2.59064	0.129249	0.311524	0.377538	0.499213
353	0.214575	0.601504	1.3288	2.59649	0.123786	0.322374	0.379942	0.499692
354	0.210526	0.601504	1.34241	2.64327	0.122566	0.319497	0.382115	0.515442
355	0.218623	0.601504	1.3685	2.65497	0.12986	0.319497	0.387045	0.506279
356	0.214575	0.616541	1.3817	2.65497	0.126201	0.326816	0.388525	0.512397
357	0.218623	0.601504	1.40273	2.65497	0.12986	0.324007	0.390443	0.515466
358	0.226721	0.609023	1.3903	2.64327	0.134632	0.329857	0.390694	0.522484
359	0.214575	0.609023	1.40388	2.61988	0.136346	0.335016	0.393984	0.517156
360	0.210526	0.609023	1.41589	2.66082	0.138355	0.340677	0.397831	0.512772
361	0.206478	0.616541	1.40579	2.66667	0.144809	0.35301	0.39752	0.489738
362	0.202429	0.601504	1.40092	2.71345	0.152732	0.357677	0.396281	0.481027
363	0.210526	0.601504	1.4254	2.70175	0.164396	0.364978	0.398353	0.479015
364	0.198381	0.586466	1.41678	2.67251	0.164305	0.36327	0.400507	0.484984
365	0.190283	0.578947	1.41996	2.67836	0.164562	0.369672	0.402528	0.492202
366	0.190283	0.631579	1.42529	2.69006	0.164562	0.389819	0.402569	0.480254
367	0.194332	0.661654	1.43678	2.69006	0.164221	0.418359	0.404338	0.465363
368	0.202429	0.661654	1.44647	2.68421	0.176566	0.434293	0.405068	0.467882
369	0.202429	0.669173	1.4487	2.67251	0.176667	0.441501	0.405613	0.458645
370	0.202429	0.669173	1.46348	2.65497	0.176667	0.441501	0.408295	0.463263
371	0.194332	0.691729	1.46493	2.63158	0.172861	0.45601	0.410922	0.451307
372	0.186235	0.691729	1.47349	2.63743	0.164786	0.470531	0.408659	0.448094
373	0.186235	0.691729	1.48583	2.65497	0.160529	0.470391	0.411769	0.440357
374	0.182186	0.684211	1.48947	2.65497	0.156496	0.455948	0.409948	0.442188
375	0.178138	0.684211	1.49437	2.63743	0.152464	0.44895	0.409564	0.446718
376	0.165992	0.699248	1.49344	2.63158	0.140374	0.457062	0.41239	0.455296
377	0.153846	0.706767	1.49251	2.64912	0.128294	0.465093	0.4116	0.46234
378	0.153846	0.684211	1.49677	2.63158	0.120588	0.437342	0.410761	0.476438
379	0.153846	0.684211	1.48942	2.62573	0.113613	0.437342	0.411325	0.493996
380	0.157895	0.669173	1.49046	2.60234	0.108585	0.423195	0.411286	0.502771
381	0.161943	0.646617	1.48367	2.56725	0.103813	0.402097	0.410488	0.509662
382	0.161943	0.631579	1.45754	2.56725	0.100687	0.38965	0.410255	0.521083
383	0.165992	0.631579	1.46278	2.5614	0.103193	0.384195	0.40842	0.523384
384	0.165992	0.62406	1.47216	2.56725	0.103707	0.370283	0.404248	0.526811
385	0.157895	0.601504	1.46061	2.5848	0.0991834	0.370893	0.403779	0.515491
386	0.174089	0.586466	1.44718	2.5731	0.104141	0.359254	0.402108	0.525617
387	0.178138	0.609023	1.42509	2.55556	0.1007	0.356754	0.40108	0.526762
388	0.174089	0.586466	1.41119	2.60234	0.0987141	0.337286	0.40077	0.539606
389	0.178138	0.586466	1.39992	2.66667	0.0983814	0.334537	0.396267	0.543223
390	0.186235	0.578947	1.39206	2.71345	0.103497	0.324239	0.389564	0.539749
391	0.198381	0.556391	1.38019	2.75439	0.107128	0.305569	0.388612	0.525657
392	0.194332	0.548872	1.38363	2.74854	0.105665	0.290748	0.386788	0.51879
393	0.190283	0.571429	1.38339	2.78363	0.102275	0.306984	0.381421	0.505772
394	0.190283	0.548872	1.36735	2.79532	0.101053	0.297919	0.376708	0.489851
395	0.198381	0.526316	1.3461	2.81871	0.103073	0.282964	0.372416	0.476204
396	0.202429	0.511278	1.3519	2.81871	0.100931	0.27293	0.373034	0.458757
397	0.214575	0.518797	1.33389	2.84211	0.102088	0.278365	0.370731	0.453094
398	0.226721	0.503759	1.33349	2.88304	0.105665	0.275849	0.370747	0.442507
399	0.234818	0.496241	1.3436	2.91813	0.111746	0.280355	0.372231	0.436936
400	0.234818	0.511278	1.35886	2.97076	0.113324	0.293426	0.375128	0.426149
401	0.238866	0.511278	1.39425	3.04094	0.122655	0.299433	0.376738	0.414957
402	0.238866	0.526316	1.39337	3.09357	0.130238	0.307107	0.378079	0.402437
403	0.246964	0.511278	1.38008	3.19298	0.138788	0.299433	0.378102	0.40389
404	0.263158	0.503759	1.39122	3.18713	0.148745	0.298803	0.381657	0.418864
405	0.255061	0.503759	1.4	3.23977	0.143377	0.305353	0.382908	0.421063
406	0.246964	0.473684	1.41132	3.30409	0.141575	0.301034	0.384578	0.414772
407	0.255061	0.481203	1.42446	3.30994	0.141131	0.314204	0.386005	0.421915
408	0.263158	0.496241	1.40287	3.31579	0.14014	0.313664	0.381082	0.406359
409	0.267206	0.496241	1.37491	3.34503	0.139564	0.320322	0.378605	0.406748
410	0.279352	0.503759	1.35723	3.36257	0.141575	0.327651	0.375956	0.412042
411	0.287449	0.481203	1.31922	3.38596	0.144705	0.328168	0.36821	0.418026
412	0.295547	0.481203	1.29389	3.36257	0.14869	0.323104	0.370108	0.420819
413	0.299595	0.473684	1.29528	3.40936	0.150571	0.315998	0.370729	0.42819
414	0.303644	0.458647	1.29842	3.45614	0.152419	0.307904	0.371212	0.419771
415	0.311741	0.443609	1.30042	3.47368	0.156705	0.295474	0.369835	0.43578
416	0.303644	0.443609	1.29762	3.49123	0.155989	0.297698	0.369597	0.445127
417	0.303644	0.458647	1.28466	3.46784	0.158249	0.306185	0.36833	0.45584
418	0.291498	0.473684	1.25433	3.47953	0.154555	0.301909	0.361276	0.466766
419	0.287449	0.451128	1.23219	3.45029	0.154899	0.289384	0.358074	0.483978
420	0.279352	0.443609	1.18959	3.4269	0.152911	0.282697	0.355845	0.500188
421	0.279352	0.421053	1.17214	3.46199	0.153143	0.274445	0.35171	0.492228
422	0.279352	0.421053	1.15403	3.4152	0.151745	0.271059	0.352152	0.497566
423	0.283401	0.413534	1.12948	3.43275	0.150707	0.259734	0.34824	0.485697
424	0.279352	0.398496	1.11246	3.4152	0.140568	0.238951	0.349426	0.474775
425	0.291498	0.398496	1.09303	3.42105	0.14085	0.246558	0.344952	0.475468
426	0.299595	0.421053	1.06261	3.42105	0.140568	0.263158	0.344376	0.469769
427	0.291498	0.383459	1.06386	3.39766	0.134134	0.2441	0.343698	0.47231
428	0.283401	0.37594	1.06945	3.38012	0.131854	0.242668	0.347333	0.47763
429	0.275304	0.390977	1.07177	3.35673	0.131127	0.240327	0.347715	0.465307
430	0.271255	0.406015	1.07937	3.36257	0.130133	0.243289	0.349127	0.450321
431	0.263158	0.390977	1.06892	3.35088	0.128507	0.227353	0.347225	0.457572
432	0.255061	0.390977	1.06362	3.30409	0.127375	0.2328	0.345703	0.457469
433	0.246964	0.398496	1.05037	3.25731	0.123918	0.234212	0.344165	0.464701
434	0.234818	0.413534	1.02687	3.22222	0.120464	0.242668	0.340244	0.467123
435	0.234818	0.421053	1.01742	3.21053	0.1258	0.252412	0.339595	0.466647
436	0.214575	0.406015	1.00981	3.22222	0.122777	0.244371	0.337852	0.466216
437	0.206478	0.390977	1.01655	3.19883	0.121322	0.250802	0.339676	0.466134
438	0.194332	0.421053	1.02206	3.19883	0.112974	0.263909	0.340486	0.473585
439	0.194332	0.451128	1.00586	3.20468	0.111072	0.271268	0.337022	0.47728
440	0.198381	0.443609	1.00523	3.17544	0.110071	0.272481	0.340378	0.495672
441	0.194332	0.451128	1.01109	3.15789	0.107662	0.275609	0.339804	0.500769
442	0.182186	0.466165	1.02182	3.1345	0.103497	0.281662	0.338436	0.508099
443	0.182186	0.481203	1.023	3.14035	0.110789	0.303962	0.335818	0.503909
444	0.178138	0.473684	1.02587	3.10526	0.116099	0.296842	0.334734	0.509074
445	0.17004	0.43609	1.02126	3.08772	0.121277	0.26977	0.32987	0.505053
446	0.178138	0.443609	1.01067	3.08772	0.128995	0.276803	0.325765	0.502226
447	0.182186	0.428571	1.00809	3.04094	0.135713	0.262764	0.321977	0.501366
448	0.182186	0.428571	1.00266	3.02924	0.138818	0.27694	0.317137	0.499161
449	0.194332	0.428571	0.995582	2.9883	0.146506	0.289514	0.312152	0.510114
450	0.206478	0.428571	0.985087	2.97661	0.151871	0.287457	0.308064	0.505975
451	0.210526	0.451128	0.974288	2.97661	0.149934	0.285945	0.303764	0.50567
452	0.218623	0.481203	0.968867	2.96491	0.152267	0.29915	0.296528	0.505281
453	0.230769	0.488722	0.976379	2.98246	0.158628	0.29833	0.294865	0.508545
454	0.226721	0.481203	0.972501	3.00585	0.157262	0.284226	0.291758	0.503943
455	0.242915	0.466165	0.957825	2.97661	0.165852	0.263265	0.288077	0.502541
456	0.255061	0.481203	0.93202	3.05848	0.176968	0.249899	0.28127	0.497257
457	0.267206	0.473684	0.907406	3.08772	0.185647	0.237051	0.2754	0.486348
458	0.271255	0.466165	0.911923	3.06433	0.186923	0.243753	0.278741	0.488146
459	0.271255	0.458647	0.90105	3.06433	0.190778	0.24356	0.275697	0.490505
460	0.271255	0.443609	0.896693	3.06433	0.190778	0.243869	0.275059	0.489249
461	0.271255	0.43609	0.879454	3.09357	0.190778	0.237805	0.277291	0.492618
462	0.287449	0.43609	0.870398	3.08772	0.194809	0.231053	0.277815	0.508545
463	0.283401	0.428571	0.844113	3.1462	0.191214	0.224307	0.275375	0.506481
464	0.279352	0.451128	0.838228	3.18713	0.187638	0.239227	0.277843	0.503688
465	0.271255	0.451128	0.841929	3.22222	0.186257	0.234212	0.279533	0.511621
466	0.271255	0.473684	0.843594	3.25146	0.186257	0.241461	0.284128	0.519383
467	0.267206	0.458647	0.831294	3.25731	0.180703	0.22818	0.282128	0.524958
468	0.263158	0.466165	0.827876	3.32749	0.175472	0.228098	0.282522	0.515665
469	0.259109	0.466165	0.834762	3.35088	0.173688	0.228098	0.279284	0.511863
470	0.259109	0.451128	0.829221	3.32749	0.177531	0.222367	0.278167	0.498442
471	0.259109	0.413534	0.822238	3.35088	0.179718	0.202031	0.28077	0.499307
472	0.251012	0.398496	0.818892	3.38596	0.174677	0.195199	0.281651	0.495595
473	0.246964	0.398496	0.812728	3.39181	0.171002	0.201517	0.27922	0.496456
474	0.238866	0.451128	0.837738	3.43275	0.16988	0.230808	0.2809	0.49254
475	0.238866	0.428571	0.8458	3.40351	0.165967	0.229826	0.286984	0.493884
476	0.234818	0.428571	0.841335	3.39766	0.164678	0.23717	0.287437	0.500239
477	0.226721	0.43609	0.827476	3.39181	0.157262	0.244371	0.285067	0.498776
478	0.226721	0.43609	0.817427	3.38596	0.154987	0.244371	0.28345	0.501383
479	0.238866	0.451128	0.816097	3.36842	0.155813	0.253678	0.280695	0.504367
480	0.255061	0.443609	0.800345	3.35088	0.164811	0.259843	0.278403	0.514637
481	0.246964	0.458647	0.784215	3.34503	0.161715	0.26977	0.273782	0.526251
482	0.251012	0.496241	0.785123	3.28655	0.160034	0.293008	0.27306	0.536173
483	0.255061	0.496241	0.794417	3.26316	0.162205	0.277992	0.272354	0.552214
484	0.259109	0.511278	0.775285	3.22807	0.163688	0.290262	0.268649	0.547034
485	0.263158	0.518797	0.765902	3.21637	0.165687	0.303744	0.268671	0.544739
486	0.259109	0.541353	0.754666	3.18129	0.163688	0.319468	0.266141	0.54669
487	0.255061	0.556391	0.746241	3.14035	0.161326	0.324007	0.263466	0.569838
488	0.251012	0.56391	0.743299	3.12281	0.155647	0.335184	0.264561	0.579545
489	0.251012	0.556391	0.731985	3.1345	0.155647	0.333239	0.261973	0.599073
490	0.242915	0.571429	0.722498	3.09942	0.150235	0.346925	0.259668	0.607385
491	0.230769	0.586466	0.714703	3.02339	0.14172	0.349199	0.259642	0.615231
492	0.226721	0.586466	0.704931	2.97076	0.139427	0.348254	0.260655	0.619096
493	0.222672	0.548872	0.679986	2.90643	0.136306	0.329657	0.260685	0.624151
494	0.222672	0.593985	0.682821	2.85965	0.138887	0.354873	0.260969	0.630237
495	0.218623	0.609023	0.677363	2.81287	0.135874	0.360615	0.262787	0.631647
496	0.222672	0.616541	0.673753	2.80702	0.132608	0.344691	0.264016	0.635345
497	0.214575	0.646617	0.673806	2.78947	0.124643	0.350385	0.263817	0.635526
498	0.210526	0.669173	0.643935	2.76023	0.124006	0.355801	0.258978	0.639636
499	0.202429	0.669173	0.633254	2.72515	0.116908	0.345265	0.2527	0.642617
500	0.190283	0.676692	0.631702	2.69591	0.109972	0.34214	0.249132	0.634786
501	0.178138	0.676692	0.63349	2.69591	0.107357	0.330969	0.248971	0.636904
502	0.17004	0.654135	0.621895	2.67836	0.0984924	0.332049	0.248822	0.637065
503	0.165992	0.646617	0.624358	2.65497	0.0945729	0.325197	0.250565	0.641138
504	0.153846	0.654135	0.609835	2.65497	0.0890842	0.314923	0.248066	0.637527
505	0.149798	0.631579	0.635265	2.67836	0.0855009	0.299276	0.249723	0.643374
506	0.137652	0.62406	0.624845	2.64912	0.0787308	0.301347	0.24877	0.644662
507	0.129555	0.616541	0.614963	2.64327	0.0757601	0.294548	0.250461	0.64602
508	0.129555	0.62406	0.624621	2.66667	0.0719122	0.296492	0.250717	0.637943
509	0.129555	0.62406	0.623971	2.66667	0.0699089	0.29201	0.250246	0.64245
510	0.129555	0.601504	0.606876	2.66667	0.0699089	0.284558	0.249621	0.641551
511	0.129555	0.601504	0.614143	2.65497	0.0683679	0.281294	0.250677	0.645921
512	0.125506	0.62406	0.603093	2.63743	0.0654277	0.281662	0.248075	0.646893
513	0.121457	0.586466	0.588137	2.63158	0.0620416	0.265013	0.246539	0.657076
514	0.125506	0.578947	0.585088	2.61988	0.0615109	0.272515	0.244861	0.65183
515	0.117409	0.56391	0.599214	2.61404	0.0593409	0.276292	0.245325	0.649004
516	0.117409	0.548872	0.588546	2.5848	0.0613998	0.279648	0.242679	0.643255
517	0.101215	0.511278	0.600887	2.63158	0.0537868	0.267314	0.245359	0.637641
518	0.0850202	0.541353	0.614388	2.64912	0.046749	0.299653	0.251675	0.629443
519	0.0809717	0.526316	0.609041	2.66082	0.0456252	0.286669	0.255547	0.63523
520	0.0850202	0.496241	0.606739	2.64912	0.0493363	0.273206	0.258951	0.630421
521	0.0769231	0.503759	0.595964	2.64912	0.0482727	0.279176	0.256894	0.625704
522	0.0688259	0.511278	0.607598	2.66082	0.04435	0.282664	0.259664	0.630061
523	0.0688259	0.488722	0.605829	2.64912	0.0405869	0.27985	0.259	0.633282
524	0.0728745	0.481203	0.594811	2.66082	0.0415185	0.281662	0.258295	0.632438
525	0.0809717	0.473684	0.595173	2.68421	0.0444423	0.272757	0.257577	0.619959
526	0.0809717	0.481203	0.594967	2.70175	0.0444423	0.276224	0.257515	0.623486
527	0.0769231	0.488722	0.580804	2.70175	0.0482727	0.280321	0.255337	0.627729
528	0.0728745	0.496241	0.59158	2.71345	0.0448096	0.290294	0.2589	0.624849
529	0.0769231	0.503759	0.60666	2.7076	0.0482727	0.293008	0.25806	0.617977
530	0.0769231	0.518797	0.602702	2.7193	0.0482727	0.305692	0.258073	0.611587
531	0.0769231	0.511278	0.609298	2.76608	0.0482727	0.320087	0.260027	0.609072
532	0.0728745	0.526316	0.613928	2.77778	0.0448096	0.333069	0.258443	0.600911
533	0.0688259	0.496241	0.618313	2.78363	0.0451437	0.310918	0.256054	0.598066
534	0.0728745	0.481203	0.602509	2.78363	0.0486111	0.301784	0.25331	0.595358
535	0.0647773	0.458647	0.616291	2.80117	0.0454452	0.282431	0.251003	0.59828
536	0.0688259	0.473684	0.601981	2.77193	0.0474451	0.291687	0.247955	0.593517
537	0.0728745	0.458647	0.594272	2.76023	0.0507555	0.286143	0.245258	0.596176
538	0.0728745	0.466165	0.591046	2.77778	0.0507555	0.27789	0.242376	0.593956
539	0.0607287	0.488722	0.591917	2.78947	0.0420741	0.2923	0.239398	0.588243
540	0.0728745	0.496241	0.584924	2.80117	0.0486111	0.291654	0.238551	0.584554
541	0.0769231	0.496241	0.575414	2.81287	0.0486392	0.27537	0.236279	0.581144
542	0.0890688	0.503759	0.587451	2.84211	0.0527612	0.271268	0.236085	0.577417
543	0.097166	0.526316	0.572364	2.82456	0.0592487	0.271788	0.234234	0.582327
544	0.101215	0.533835	0.579258	2.83041	0.0664839	0.261253	0.236843	0.589861
545	0.11336	0.526316	0.581721	2.83041	0.0736761	0.237329	0.235852	0.590774
546	0.121457	0.496241	0.57716	2.83041	0.0761736	0.222959	0.23497	0.584225
547	0.133603	0.473684	0.566941	2.8538	0.0820608	0.202543	0.233737	0.586525
548	0.137652	0.466165	0.546414	2.91228	0.0864699	0.197741	0.231757	0.598937
549	0.133603	0.458647	0.550792	2.95322	0.0846176	0.191052	0.229702	0.610418
550	0.137652	0.43609	0.546101	2.97076	0.0864699	0.171015	0.227733	0.613979
551	0.137652	0.398496	0.536709	2.9883	0.0880974	0.149685	0.229288	0.621804
552	0.133603	0.421053	0.545944	3.02339	0.0864857	0.159143	0.233212	0.622258
553	0.129555	0.43609	0.549349	3.05263	0.0875062	0.169075	0.236278	0.619276
554	0.137652	0.451128	0.544191	3.07018	0.0924254	0.176011	0.236564	0.619524
555	0.133603	0.43609	0.544936	3.08187	0.0928236	0.172551	0.232053	0.622196
556	0.133603	0.43609	0.541256	3.08187	0.0954642	0.169075	0.233896	0.614543
557	0.1417	0.406015	0.550835	3.04678	0.098534	0.146053	0.235223	0.610733
558	0.1417	0.406015	0.571175	3.03509	0.098534	0.166718	0.240573	0.598037
559	0.129555	0.390977	0.585798	3.02924	0.0933957	0.159911	0.244849	0.596176
560	0.133603	0.368421	0.584975	3.0117	0.0904989	0.146633	0.247004	0.595315
561	0.121457	0.353383	0.581048	2.98246	0.0791461	0.13864	0.245609	0.597909
562	0.11336	0.330827	0.593574	2.97661	0.0722155	0.146504	0.245737	0.606984
563	0.11336	0.300752	0.605961	2.91813	0.0722155	0.147402	0.243543	0.606984
564	0.105263	0.293233	0.609786	2.87134	0.0650089	0.159498	0.243321	0.604889
565	0.101215	0.308271	0.616875	2.8538	0.0637572	0.167395	0.240528	0.623102
566	0.0931174	0.308271	0.641445	2.82456	0.0590409	0.161377	0.243526	0.620703
567	0.101215	0.315789	0.668239	2.78363	0.0609084	0.165641	0.248152	0.613122
568	0.11336	0.293233	0.663744	2.74854	0.069202	0.158252	0.246544	0.622793
569	0.109312	0.285714	0.692055	2.7076	0.0685873	0.155308	0.251868	0.624911
570	0.117409	0.330827	0.709165	2.68421	0.0658647	0.175206	0.254084	0.628158
571	0.117409	0.330827	0.729067	2.66082	0.0658647	0.168685	0.254112	0.630183
572	0.117409	0.300752	0.738334	2.61404	0.0642267	0.147402	0.256263	0.636615
573	0.11336	0.300752	0.757825	2.5848	0.0638642	0.139588	0.259871	0.648675
574	0.121457	0.315789	0.763527	2.56725	0.0661957	0.146182	0.263548	0.657238
575	0.125506	0.308271	0.773769	2.54386	0.0654277	0.147721	0.260071	0.651666
576	0.121457	0.315789	0.760235	2.54971	0.0591102	0.158728	0.2554	0.653854
577	0.129555	0.330827	0.738225	2.52047	0.0629595	0.172168	0.252869	0.659148
578	0.149798	0.345865	0.739528	2.51462	0.0729494	0.172605	0.247912	0.65718
579	0.17004	0.360902	0.745673	2.51462	0.0832507	0.172823	0.249379	0.660916
580	0.194332	0.37594	0.747473	2.53216	0.0931614	0.172058	0.250965	0.651397
581	0.210526	0.37594	0.743024	2.52047	0.100252	0.17129	0.25288	0.641278
582	0.214575	0.383459	0.742792	2.52632	0.100334	0.174451	0.251191	0.635405
583	0.242915	0.390977	0.739287	2.53216	0.112526	0.174505	0.248353	0.631728
584	0.255061	0.421053	0.747284	2.52047	0.118866	0.181596	0.250436	0.628492
585	0.279352	0.443609	0.728218	2.47953	0.130479	0.185498	0.247184	0.626898
586	0.295547	0.443609	0.706573	2.47953	0.142345	0.18902	0.242701	0.621412
587	0.303644	0.473684	0.704674	2.44444	0.151014	0.199591	0.242197	0.613352
588	0.368421	0.488722	0.692831	2.40351	0.176929	0.199165	0.23793	0.607611
589	0.372807	0.466165	0.675562	2.34503	0.175881	0.189219	0.231558	0.603424
590	0.407895	0.481203	0.644765	2.31579	0.189216	0.189219	0.224527	0.601437
591	0.438596	0.503759	0.639205	2.30994	0.201916	0.195874	0.220642	0.605736
592	0.464912	0.526316	0.612435	2.2924	0.217481	0.211776	0.215788	0.602148
593	0.491228	0.526316	0.614116	2.27485	0.227536	0.216701	0.216847	0.599565
594	0.52193	0.541353	0.602561	2.28655	0.239006	0.219638	0.218284	0.606857
595	0.557018	0.556391	0.605759	2.25731	0.249553	0.216353	0.220992	0.60599
596	0.587719	0.541353	0.602821	2.27485	0.263844	0.229908	0.220338	0.609304
597	0.600877	0.526316	0.594193	2.23977	0.267318	0.231989	0.225777	0.615419
598	0.596491	0.541353	0.588277	2.21053	0.262482	0.236414	0.225837	0.609507
599	0.596491	0.548872	0.594849	2.1462	0.258841	0.238951	0.224178	0.614898
600	0.600877	0.56391	0.594992	2.11696	0.257199	0.24464	0.225254	0.617707
601	0.614035	0.586466	0.585903	2.11111	0.259961	0.256926	0.225225	0.616502
602	0.609649	0.593985	0.579352	2.10526	0.254853	0.274136	0.228204	0.615162
603	0.609649	0.571429	0.561625	2.08187	0.253787	0.273585	0.226548	0.615044
604	0.596491	0.556391	0.550823	2.06433	0.246183	0.266856	0.225751	0.610313
605	0.583333	0.571429	0.548508	2.01754	0.239896	0.275746	0.219591	0.616973
606	0.592105	0.571429	0.531221	2.02924	0.243158	0.283297	0.214436	0.615106
607	0.578947	0.593985	0.504918	2.04678	0.237261	0.295888	0.211932	0.614376
608	0.583333	0.631579	0.498356	2.04094	0.239168	0.306031	0.210744	0.61377
609	0.565789	0.646617	0.50164	2.04678	0.232238	0.30726	0.21137	0.614188
610	0.548246	0.646617	0.498661	2.04094	0.225237	0.306185	0.210114	0.612139
611	0.535088	0.616541	0.495177	2.02339	0.220137	0.286143	0.205261	0.607238
612	0.504386	0.616541	0.496776	2.00585	0.207884	0.281261	0.203057	0.618993
613	0.47807	0.593985	0.498301	1.9883	0.198346	0.284988	0.202736	0.61621
614	0.442982	0.56391	0.495938	1.97076	0.185946	0.283363	0.202652	0.616294
615	0.425439	0.541353	0.494561	1.95906	0.181944	0.268299	0.203419	0.617894
616	0.399123	0.541353	0.488379	1.93567	0.174221	0.268299	0.200345	0.615148
617	0.385965	0.518797	0.475968	1.91813	0.171179	0.252001	0.199181	0.620772
618	0.372807	0.526316	0.463887	1.92982	0.16834	0.248992	0.196001	0.620331
619	0.350877	0.511278	0.45005	1.94152	0.161273	0.238082	0.194336	0.624069
620	0.324561	0.481203	0.440428	1.92982	0.152824	0.214999	0.195072	0.617035
621	0.307018	0.511278	0.433256	1.93567	0.14123	0.215699	0.19642	0.627593
622	0.298246	0.511278	0.439926	1.92398	0.135847	0.209809	0.198108	0.62201
623	0.29386	0.503759	0.447313	1.92398	0.127934	0.19755	0.195122	0.618412
624	0.289474	0.481203	0.453054	1.95322	0.124097	0.178456	0.199877	0.620421
625	0.27193	0.466165	0.461352	1.94152	0.121468	0.168964	0.205055	0.627082
626	0.258772	0.428571	0.463189	1.91813	0.119478	0.152985	0.206177	0.624418
627	0.25	0.383459	0.466761	1.95322	0.115968	0.132808	0.20896	0.619179
628	0.25	0.330827	0.459724	1.92398	0.119909	0.111775	0.207618	0.607047
629	0.25	0.315789	0.455068	1.95322	0.127732	0.108351	0.208435	0.609093
630	0.258772	0.308271	0.456907	1.99415	0.140629	0.109819	0.212319	0.614313
631	0.276316	0.308271	0.452364	2.01754	0.153746	0.109819	0.212863	0.605644
632	0.280702	0.300752	0.449803	2.02339	0.16031	0.10571	0.211304	0.617665
633	0.289474	0.300752	0.453641	2.06433	0.170858	0.10571	0.211255	0.621804
634	0.289474	0.300752	0.462598	2.04678	0.182268	0.111183	0.212177	0.626346
635	0.298246	0.308271	0.467464	2.11696	0.192888	0.119594	0.214079	0.630651
636	0.302632	0.338346	0.472179	2.16959	0.198412	0.123623	0.216071	0.630468
637	0.302632	0.315789	0.468209	2.20468	0.208968	0.113116	0.218462	0.624377
638	0.328947	0.323308	0.472125	2.19883	0.222874	0.119041	0.219554	0.626243
639	0.346491	0.315789	0.47542	2.21053	0.231597	0.119909	0.220721	0.63237
640	0.355263	0.293233	0.478878	2.18713	0.236125	0.109475	0.223152	0.622196
641	0.377193	0.278195	0.489728	2.18129	0.241135	0.114111	0.225959	0.626509
642	0.381579	0.270677	0.488864	2.21053	0.241238	0.114523	0.230026	0.632127
643	0.385965	0.255639	0.484071	2.20468	0.239644	0.114523	0.229479	0.631728
644	0.399123	0.263158	0.486604	2.20468	0.241426	0.130446	0.228541	0.627082
645	0.412281	0.255639	0.494359	2.21053	0.248727	0.123394	0.230763	0.629688
646	0.412281	0.24812	0.510809	2.20468	0.248181	0.10695	0.232645	0.639656
647	0.416667	0.24812	0.51208	2.20468	0.245641	0.10695	0.234712	0.644987
648	0.416667	0.24812	0.520981	2.18713	0.239735	0.101248	0.234936	0.648002
649	0.416667	0.24812	0.520273	2.1462	0.236972	0.0931036	0.235443	0.636178
650	0.416667	0.233083	0.515499	2.10526	0.237135	0.0802788	0.232351	0.630054
651	0.416667	0.24812	0.529608	2.07602	0.235084	0.0887515	0.235876	0.61978
652	0.416667	0.278195	0.540563	2.04678	0.23566	0.0992747	0.236088	0.614877
653	0.412281	0.278195	0.538896	2.02924	0.22995	0.0972612	0.239104	0.612097
654	0.416667	0.285714	0.538584	1.95906	0.233513	0.0959936	0.238191	0.602829
655	0.421053	0.255639	0.54672	1.88889	0.237098	0.0892808	0.240611	0.595422
656	0.421053	0.263158	0.545991	1.85965	0.237098	0.0933058	0.240267	0.591179
657	0.407895	0.255639	0.555359	1.83041	0.230647	0.102359	0.243464	0.582444
658	0.390351	0.270677	0.556132	1.80117	0.224202	0.10739	0.243361	0.569688
659	0.377193	0.255639	0.564051	1.79532	0.217926	0.12656	0.24301	0.566686
660	0.350877	0.263158	0.563978	1.79532	0.20945	0.128921	0.23977	0.563076
661	0.342105	0.278195	0.562324	1.74854	0.2046	0.142395	0.238954	0.548844
662	0.328947	0.308271	0.573469	1.72515	0.200355	0.15555	0.241658	0.537439
663	0.311404	0.285714	0.576718	1.71345	0.194102	0.157417	0.243117	0.520369
664	0.298246	0.300752	0.587473	1.73099	0.185516	0.165925	0.246023	0.510165
665	0.29386	0.300752	0.579765	1.70175	0.184902	0.169465	0.247235	0.485635
666	0.280702	0.315789	0.583704	1.7076	0.183204	0.183043	0.249157	0.471005
667	0.27193	0.315789	0.581091	1.69006	0.182622	0.183043	0.251239	0.46874
668	0.254386	0.330827	0.577655	1.69006	0.177676	0.195151	0.24929	0.458869
669	0.25	0.345865	0.578787	1.69591	0.174407	0.19621	0.250385	0.455784
670	0.236842	0.353383	0.574398	1.70175	0.170744	0.198834	0.250805	0.449513
671	0.232456	0.353383	0.561923	1.70175	0.166605	0.206642	0.250762	0.438158
672	0.22807	0.360902	0.565432	1.70175	0.161633	0.209404	0.251109	0.422876
673	0.214912	0.360902	0.571525	1.68421	0.156163	0.214077	0.253865	0.416366
674	0.20614	0.345865	0.567063	1.71345	0.150991	0.204764	0.24988	0.414896
675	0.197368	0.330827	0.572197	1.70175	0.142499	0.192428	0.252016	0.405221
676	0.184211	0.338346	0.565617	1.73099	0.142141	0.18867	0.248635	0.408007
677	0.188596	0.330827	0.567193	1.73684	0.142136	0.190707	0.24977	0.406548
678	0.192982	0.330827	0.561327	1.74854	0.146283	0.184019	0.250515	0.411232
679	0.192982	0.315789	0.558307	1.75439	0.146283	0.180503	0.253733	0.409284
680	0.197368	0.323308	0.556678	1.77193	0.146388	0.178456	0.254628	0.40617
681	0.197368	0.330827	0.542204	1.77778	0.146388	0.172932	0.251221	0.41254
682	0.197368	0.338346	0.538564	1.78947	0.142499	0.178983	0.252509	0.417105
683	0.20614	0.338346	0.537299	1.80117	0.143897	0.178983	0.251331	0.421032
684	0.210526	0.338346	0.534934	1.82456	0.141527	0.182269	0.252776	0.425145
685	0.210526	0.338346	0.531181	1.82456	0.138623	0.182269	0.25158	0.435427
686	0.219298	0.353383	0.520945	1.84795	0.141093	0.186864	0.249658	0.441259
687	0.223684	0.338346	0.528451	1.90058	0.140307	0.182269	0.255496	0.461127
688	0.219298	0.315789	0.531641	1.91813	0.140542	0.174559	0.258799	0.477254
689	0.223684	0.308271	0.517727	1.93567	0.141133	0.170518	0.253761	0.475773
690	0.223684	0.300752	0.510841	1.97076	0.141133	0.169465	0.249914	0.484613
691	0.219298	0.293233	0.503606	2.03509	0.139018	0.168741	0.246946	0.499307
692	0.214912	0.285714	0.480463	2.07602	0.135579	0.175635	0.23822	0.514645
693	0.20614	0.315789	0.471123	2.08187	0.130036	0.18802	0.23423	0.527857
694	0.210526	0.315789	0.457413	2.12281	0.131303	0.196258	0.231794	0.5497
695	0.20614	0.308271	0.448669	2.11696	0.127782	0.197407	0.230551	0.550873
696	0.201754	0.315789	0.440012	2.16374	0.124305	0.197264	0.226303	0.561228
697	0.210526	0.323308	0.429354	2.15789	0.127105	0.199402	0.22309	0.560031
698	0.232456	0.345865	0.41053	2.15789	0.137987	0.212974	0.218201	0.561746
699	0.236842	0.315789	0.398565	2.17544	0.144574	0.19926	0.213458	0.567673
700	0.241228	0.285714	0.386828	2.16959	0.145236	0.193503	0.209368	0.573793
701	0.254386	0.278195	0.374284	2.15205	0.150782	0.17745	0.204784	0.576446
702	0.241228	0.293233	0.351933	2.12866	0.141999	0.183711	0.201407	0.576023
703	0.236842	0.300752	0.33879	2.11111	0.138273	0.184019	0.193786	0.575912
704	0.232456	0.300752	0.335179	2.09942	0.135293	0.184019	0.18912	0.579176
705	0.22807	0.293233	0.331094	2.07602	0.127308	0.185498	0.188523	0.592681
706	0.223684	0.315789	0.322656	2.04094	0.124662	0.198597	0.184414	0.594021
707	0.22807	0.345865	0.320137	2.02924	0.128217	0.206048	0.184198	0.592551
708	0.22807	0.338346	0.326456	2.0117	0.130315	0.193843	0.185102	0.597186
709	0.219298	0.315789	0.336826	1.94152	0.124927	0.173041	0.185623	0.585519
710	0.223684	0.338346	0.326354	1.87719	0.129987	0.176385	0.185448	0.58968
711	0.232456	0.330827	0.335119	1.83626	0.133998	0.163523	0.191038	0.574842
712	0.245614	0.323308	0.336738	1.84211	0.141709	0.165414	0.187553	0.570445
713	0.245614	0.338346	0.33327	1.77193	0.144819	0.174127	0.187332	0.557622
714	0.254386	0.338346	0.347555	1.77193	0.148973	0.165982	0.190762	0.566248
715	0.263158	0.338346	0.371789	1.73099	0.159664	0.163983	0.19868	0.569936
716	0.254386	0.330827	0.410034	1.72515	0.159522	0.161902	0.2163	0.569823
717	0.241228	0.330827	0.419815	1.73684	0.159962	0.163523	0.231752	0.571187
718	0.232456	0.345865	0.418476	1.74854	0.163317	0.176385	0.228	0.570025
719	0.237358	0.360902	0.319106	1.74269	0.175289	0.184989	0.221302	0.567365

## Sheet: Panel E
OD	Mean Coma	Mean Simp	CI Coma	CI Simp
0.1	1.0514	1.17236	0.720223	0.570575
0.3	1.82338	1.35364	0.848605	0.568615
1	3.08576	2.54209	0.735662	0.957371
3	5.41946	4.61	0.434618	0.236468

## Sheet: Panel F
OD	H Mean	M Mean	H CI	M CI
0.1	560.4	404.385	136.209	180.208
0.3	379.667	389	120.512	303.222
1	233.562	306.652	81.2918	98.7426
3	153.538	163.889	61.8049	176.383
