# Supplementary material for: The nematode worm C. elegans chooses between bacterial foods as if maximizing economic utility
Source: eLife. 2023 Apr 25;12:e69779. doi: 10.7554/eLife.69779 (PMC10231927; doi:10.7554/eLife.69779)
Supplement: Figure 5—source data 1. [file elife-69779-fig5-data1.xlsx]

## Sheet: Panel A
Price	ComaMean	SimpMean	Coma CI	Simp CI
10	14.5533	20.4615	131.662	192.632
3.33333	166.829	98.1	417.824	204.117
1	791.625	754.609	342.619	367.97
0.333333	7976.77	5839.33	539.859	462.328

## Sheet: Panel B
Log price ratio	Mean preference Trained	Mean preference Untrained	CI preference Trained	CI preference Untrained
1	0.798	0.0668351	0.721	0.0636197
0.477121	0.75	0.0610782	0.691	0.0814377
0	0.697	0.0481396	0.6	0.0471921
-0.477121	0.715	0.0390551	0.543	0.116652
-1	0.59	0.0506356	0.439	0.0784373
-1.47712	0.469	0.0734525	0.467	0.0657171
-2.30103	0.337	0.0599561	0.221	0.0748335

## Sheet: Panel C
Mean consumption M Trained	Mean consumption H Trained	Mean consumption M Untrained	Mean consumption H Untrained	CI consumption H Trained	CI consumption H Untrained
1.989	0.005055	2.337	0.003315	0.00100253	0.00124793
1.593	0.0469	1.599	0.0467	0.00769133	0.00701269
0.41	0.059	0.561	0.0439	0.00502326	0.00738659
0.855	0.715	1.371	0.543	0.0390551	0.116652
0.303	0.697	0.4	0.6	0.0485258	0.0501127
0.25	2.25	0.309	2.073	0.17499	0.22895
0.0202	0.798	0.0279	0.721	0.0599561	0.0572256

## Sheet: Panel D
Consumption M Trained	Consumption H Trained	Consumption M Untrained	Consumption M Unrained
0.22765	2.31705	0.323009	2.03097
0.331091	2.00448	0.462661	1.74134
0.572909	1.42709	0.779605	1.2204
0.248318	1.50336	0.346996	1.30601
0.151766	1.5447	0.215339	1.35398
0.477424	1.18924	0.64967	1.017
0.87438	0.896144	1.15834	0.754164
0.381939	0.951394	0.519736	0.813597
1.06049	0.646503	1.38301	0.538998
0.655785	0.672108	0.868754	0.565623
0.706993	0.431002	0.922005	0.359332
