# Supplementary material for: The nematode worm C. elegans chooses between bacterial foods as if maximizing economic utility
Source: eLife. 2023 Apr 25;12:e69779. doi: 10.7554/eLife.69779 (PMC10231927; doi:10.7554/eLife.69779)
Supplement: Figure 5—source data 2. [file elife-69779-fig5-data2.xlsx]

## Sheet: Sheet1
StDev Trained	StDev Untrained
-2.00622	0.11733
-0.0480362	1.71416
-0.785533	1.8687
0.714891	-0.226075
0.931054	-0.749768
-0.721956	0.744045
0.575021	-0.672502
1.00735	-0.0972982
0.333428	-1.12751
1.48963	-1.21337
0.792354	-0.423533
-0.103006	0.0658193
-0.89536	1.27417
-1.14099	0.780828
0.610113	1.18167
-0.538801	-0.583581
0.784431	-1.16172
-1.45793	-1.47006
0.911207	-0.884213
1.02214	-0.84567
0.443718	-0.298365
-0.356559	-0.182737
-1.56094	0.572698
-0.262797	0.896456
1.12906	0.865622
-1.39185	1.39751
-1.21666	-0.0594011
-0.447729	0.24894
1.01226	-1.73215
-0.671594	0.373181
-1.80065	-0.299974
1.69358	-0.67137
-0.554795	1.01539
1.14852	-0.392823
-0.340663	0.481505
1.47945	-0.276761
-0.155732	1.36357
-0.243331	-0.106538
0.340663	1.75818
0.515862	-0.145225
-0.233598	-1.40642
0.955603	-1.69271
-1.67911	1.47096
1.32299	1.87399
-0.346007	-1.00167
-0.849857	-0.435252
0.367778	-1.2522
-1.32221	-0.478823
-0.723894	-0.380789
-0.996813	0.594103
-2.06749	-0.968992
1.37548	0.833742
0.105357	-0.418913
-0.398491	0.163844
0.987093	-0.437664
1.69038	1.37147
-0.0625921	-1.5346
0.0318796	0.618343
-0.492963	0.397318
-0.125574	-0.634131
1.36498	0.626529
0.441257	0.659274
-0.125574	-1.57553
1.36498	0.872113
0.178836	-0.732364
-0.608429	-0.421292
-1.0388	0.831182
0.651194	1.16681
1.53961	1.63342
1.2916	-0.224825
1.72809	1.07677
0.984078	-1.06799
-0.513864	0.430063
0.626953	0.70839
-0.553544	-1.28083
-2.55741	-1.30539
-0.781708	0.03713
-0.464263	0.18448
0.0416644	1.44514
0.140866	-0.282128
-0.24602	-0.920644
-0.494023	-1.64102
0.329349	1.1509
0.329349	-0.0175707
0.676554	-0.764335
-0.31546	0.597412
-0.990031	0.86976
-0.771787	0.975186
0.998173	-1.55503
0.0442082	0.571055
0.346684	-0.360204
-1.15406	-1.46717
0.346684	0.561379
0.0558417	-0.0738659
-1.24713	1.66936
1.96377	-1.34435
-0.898123	0.265916
-0.456041	-0.0738659
0.00257366	-1.00457
-1.29472
0.0180184
1.53153
-0.815958
0.558558
