# Supplementary material for: The nematode worm C. elegans chooses between bacterial foods as if maximizing economic utility
Source: eLife. 2023 Apr 25;12:e69779. doi: 10.7554/eLife.69779 (PMC10231927; doi:10.7554/eLife.69779)
Supplement: Figure 6—source data 1. [file elife-69779-fig6-data1.xlsx]

## Sheet: Panel A
Consumption of contstant price food	Consumption of contstant price food		Consumption of contstant price food	Consumption of contstant price food		Consumption of contstant price food	Consumption of contstant price food
H deg	H deg		M cef	M cef		M abd	M abd
Trained	Untrained	Log price of other food	Trained	Untrained	Log price of other food	Trained	Untrained	Log price of other food	CI column A	CI column B	CI column D	CI column E	CI column G	CI column H
0.717	0.543	-0.477121	0.25	0.31	-0.477121	0.849	1.371	0	0.0377597	0.118099	0.0576233	0.0792232	0.13006	0.354298
0.697	0.6	0	0.303	0.4	0	1.593	1.593	1	0.0473562	0.0474534	0.0473562	0.0474534	0.220474	0.200356
0.798	0.72	1	0.41	0.561	1	1.99	2.336	1.82391	0.0733928	0.0657673	0.0558427	0.0826594	0.161971	0.224764

## Sheet: Panel B
Consumption M Trained	Consumption H Trained	Consumption M Untrained	Consumption M Unrained
0.22765	2.31705	0.323009	2.03097
0.331091	2.00448	0.462661	1.74134
0.572909	1.42709	0.779605	1.2204
0.248318	1.50336	0.346996	1.30601
0.151766	1.5447	0.215339	1.35398
0.477424	1.18924	0.64967	1.017
0.87438	0.896144	1.15834	0.754164
0.381939	0.951394	0.519736	0.813597
1.06049	0.646503	1.38301	0.538998
0.655785	0.672108	0.868754	0.565623
0.706993	0.431002	0.922005	0.359332

## Sheet: Panel C
Consumption M Trained	Consumption H Trained
0.22765	2.31705
0.331091	2.00448
0.572909	1.42709
0.248318	1.50336
0.151766	1.5447
0.477424	1.18924
0.87438	0.896144
0.381939	0.951394
1.06049	0.646503
0.655785	0.672108
0.706993	0.431002

## Sheet: Panel D
Consumption M Untrained	Consumption M Unrained
0.323009	2.03097
0.462661	1.74134
0.779605	1.2204
0.346996	1.30601
0.215339	1.35398
0.64967	1.017
1.15834	0.754164
0.519736	0.813597
1.38301	0.538998
0.868754	0.565623
0.922005	0.359332
