# Supplementary material for: The nematode worm C. elegans chooses between bacterial foods as if maximizing economic utility
Source: eLife. 2023 Apr 25;12:e69779. doi: 10.7554/eLife.69779 (PMC10231927; doi:10.7554/eLife.69779)
Supplement: Figure 7—source data 1. [file elife-69779-fig7-data1.xlsx]

## Sheet: Panel A
Frequency index	Preference
0.449451	0.808
0.483766	0.557
0.51932	0.843
0.500891	0.684
0.508056	0.636
0.489491	0.752
0.496528	0.591
0.497507	0.648
0.457694	0.622
0.486173	0.848
0.511178	0.727
0.461622	0.679
0.485828	0.878
0.501056	0.811
0.430953	0.852
0.490325	0.827
0.480968	0.871
0.39091	0.796
0.48061	0.645
0.490448	0.76
0.488846	0.641
0.50731	0.439
0.559349	0.179
0.499437	0.333
0.612922	0.393
0.532043	0.28
0.503865	0.382
0.535797	0.416
0.494385	0.363
0.490482	0.618
0.508272	0.65
0.5072	0.701
0.493552	0.711
0.499078	0.672
0.463454	0.647
0.436497	0.73
0.49518	0.73
0.514597	0.765
0.459041	0.665
0.513892	0.597
0.491562	0.657
0.33349	0.569
0.503544	0.356
0.527956	0.325
0.499458	0.546
0.576084	0.401
0.401246	0.768
0.603326	0.413
0.510204	0.649
0.505628	0.677
0.464175	0.681
0.53105	0.408
0.529006	0.511
0.429916	0.549
0.451575	0.743
0.493781	0.821
0.501064	0.688
0.503388	0.603
0.513968	0.758
0.491244	0.801
0.480134	0.755
0.486114	0.649
0.476061	0.887
0.528815	0.632
0.529243	0.568
0.601832	0.8
0.494777	0.447
0.523652	0.465
0.514372	0.544
0.511583	0.521
0.587489	0.405
0.495916	0.764
0.470821	0.533
0.490704	0.555
0.498062	0.742
0.505942	0.565
0.548481	0.711
0.489961	0.72
0.493972	0.67
0.496987	0.705
0.465084	0.847
0.437684	0.759
0.506791	0.705
0.503417	0.847
0.414248	0.659
0.495361	0.618
0.485927	0.779
0.494111	0.754
0.505271	0.651
0.526391	0.755
0.482812	0.643
0.496857	0.673
0.536265	0.711
0.463028	0.798
0.404479	0.714
0.454923	0.799
0.497341	0.745
0.41217	0.834
0.499043	0.715
0.476602	0.715
0.501729	0.758
0.491451	0.652
0.4697	0.629
0.491284	0.738
0.491269	0.732
0.501611	0.47
0.493797	0.653
0.485116	0.687
0.516328	0.444
0.541182	0.441
0.485496	0.605
0.475029	0.623
0.467873	0.777
0.489689	0.566
0.515961	0.488
0.491456	0.4
0.507192	0.42
0.509693	0.257
0.514283	0.22
0.542459	0.359
0.533695	0.463
0.617408	0.313
0.496325	0.652
0.467682	0.365
0.2528	0.696
0.670184	0.285
0.436935	0.584
0.461722	0.598
0.546542	0.443
0.45232	0.583
0.570336	0.242
0.52666	0.235
0.569007	0.421
0.634977	0.439
0.507605	0.195
0.582955	0.134
0.56446	0.143
0.514382	0.21
0.629875	0.09
0.525857	0.08
0.490314	0.172
0.527652	0.229

## Sheet: Panel B
Dwell time index	Preference
0.5307	0.563
0.685925	0.706
0.7731	0.808
0.57732	0.557
0.851206	0.843
0.669956	0.684
0.660786	0.636
0.760288	0.752
0.602317	0.591
0.711274	0.648
0.604831	0.622
0.415923	0.52
0.867166	0.848
0.733246	0.727
0.697509	0.679
0.814783	0.878
0.775125	0.811
0.842763	0.852
0.830042	0.827
0.868571	0.871
0.810597	0.796
0.65605	0.645
0.729206	0.76
0.64945	0.641
0.4422	0.439
0.197364	0.179
0.323006	0.333
0.249448	0.275
0.437263	0.393
0.432076	0.41
0.288653	0.28
0.392321	0.382
0.384678	0.416
0.352666	0.363
0.627642	0.618
0.641115	0.65
0.693796	0.701
0.713316	0.711
0.70233	0.672
0.615032	0.647
0.752015	0.73
0.749324	0.73
0.757309	0.765
0.686436	0.665
0.59397	0.597
0.632326	0.619
0.654203	0.657
0.569436	0.569
0.457371	0.456
0.347797	0.356
0.386016	0.325
0.583299	0.546
0.398419	0.401
0.561444	0.568
0.515934	0.547
0.766442	0.768
0.385451	0.413
0.653488	0.676
0.639178	0.649
0.468365	0.523
0.67271	0.677
0.703422	0.681
0.417904	0.408
0.732632	0.707
0.504804	0.511
0.601177	0.549
0.690532	0.702
0.739545	0.743
0.91895	0.821
0.813466	0.688
0.736379	0.603
0.866909	0.758
0.856523	0.789
0.860415	0.801
0.635107	0.513
0.869875	0.755
0.770714	0.649
0.566239	0.523
0.434702	0.813
0.790452	0.887
0.655479	0.632
0.662607	0.568
0.671407	0.62
0.428337	0.391
0.336736	0.316
0.35392	0.276
0.403043	0.352
0.746557	0.8
0.637333	0.573
0.463129	0.447
0.385168	0.465
0.665063	0.544
0.691068	0.694
0.524502	0.521
0.408317	0.405
0.787033	0.764
0.586692	0.533
0.664567	0.708
0.577185	0.555
0.82668	0.742
0.590162	0.574
0.582157	0.565
0.607621	0.625
0.695006	0.643
0.592131	0.566
0.719417	0.711
0.733555	0.72
0.679677	0.67
0.758008	0.705
0.820392	0.847
0.76049	0.759
0.716806	0.705
0.859382	0.847
0.747763	0.734
0.664239	0.659
0.642217	0.618
0.775183	0.779
0.806261	0.836
0.773783	0.754
0.780804	0.78
0.63686	0.651
0.768281	0.78
0.742181	0.755
0.853256	0.643
0.912618	0.919
0.689271	0.673
0.796375	0.711
0.79048	0.798
0.881611	0.714
0.80031	0.799
0.913982	0.897
0.80342	0.745
0.828453	0.834
0.676233	0.715
0.637284	0.715
0.738405	0.758
0.547141	0.833
0.622016	0.652
0.638577	0.629
0.591569	0.738
0.729204	0.732
0.455874	0.47
0.672262	0.653
0.693132	0.687
0.469238	0.444
0.437944	0.441
0.606834	0.605
0.627262	0.623
0.780356	0.777
0.585324	0.566
0.487693	0.488
0.385505	0.4
0.465869	0.487
0.355932	0.4
0.271618	0.352
0.462373	0.57
0.304959	0.388
0.412776	0.501
0.375036	0.403
0.531852	0.615
0.385866	0.425
0.67684	0.666
0.369731	0.42
0.232165	0.257
0.190996	0.22
0.323713	0.359
0.389182	0.463
0.175643	0.313
0.452852	0.455
0.132188	0.473
0.638053	0.652
0.317797	0.365
0.624047	0.696
0.222796	0.466
0.543411	0.573
0.326015	0.285
0.554549	0.584
0.56197	0.598
0.520548	0.525
0.408842	0.424
0.255147	0.272
0.378041	0.357
0.469148	0.428
0.495055	0.443
0.597139	0.541
0.607726	0.583
0.651874	0.579
0.722808	0.648
0.488486	0.459
0.55935	0.499
0.31095	0.242
0.242847	0.235
0.372009	0.421
0.414411	0.439
0.153627	0.195
0.113514	0.134
0.294362	0.308
0.14134	0.143
0.198195	0.21
0.132281	0.09
0.100354	0.08
0.196746	0.172
0.235439	0.229

## Sheet: Panel C
Dwell time index	Head angle
0.5307	0.4558
0.6859	32.1311
0.7731	22.678
0.5773	13.332
0.8512	48.955
0.67	19.075
0.6608	18.29
0.7603	35.555
0.6023	12.491
0.7113	35.591
0.6048	13.941
0.4159	0.3829
0.8672	58.966
0.7332	31.245
0.6975	50.749
0.8148	68.467
0.7751	33.339
0.8428	21.671
0.83	71.998
0.8686	87.309
0.8106	51.326
0.6561	34.6
0.7292	40.747
0.6494	23.689
0.4422	-10.891
0.1974	-52.52
0.323	-14.39
0.2494	-25.578
0.4373	-1.766
0.4321	-1.469
0.2887	-19.539
0.3923	-30.097
0.3847	-14.873
0.3527	-19.723
0.6276	23.384
0.6411	27.875
0.6938	30.201
0.7133	22.285
0.7023	38.982
0.615	10.323
0.752	55.498
0.7493	32.056
0.7573	48.873
0.6864	32.182
0.594	20.322
0.6323	20.856
0.6542	12.673
0.5694	7.317
0.4574	-1.396
0.3478	-13.696
0.386	-15.463
0.5833	8.8002
0.3984	-11.777
0.5614	11.031
0.5159	1.82
0.7664	41.925
0.3855	-26.467
0.6535	25.247
0.6392	17.501
0.4684	-2.214
0.6727	15.558
0.7034	20.416
0.4179	-16.703
0.7326	28.216
0.5048	0.134
0.6012	4.177
0.6905	30.141
0.7395	26.304
0.9189	68.925
0.8135	57.791
0.7364	50.372
0.8669	51.614
0.8565	57.437
0.8604	53.388
0.6351	28.458
0.8699	47.385
0.7707	32.682
0.5662	8.011
0.4347	17.121
0.7905	62.997
0.6555	36.451
0.6626	22.109
0.6714	37.175
0.4283	-5.025
0.3367	-26.665
0.3539	-26.249
0.403	-5.409
0.7466	22.743
0.6373	19.709
0.4631	-5.712
0.3852	-7.873
0.6651	-2.736
0.6911	27.894
0.5245	16.006
0.4083	-9.162
0.787	40.569
0.5867	18.113
0.6646	32.174
0.5772	11.269
0.8267	38.012
0.5902	10.317
0.5822	16.786
0.6076	14.408
0.695	3.649
0.5921	4.55
0.7194	35.727
0.7336	41.882
0.6797	17.612
0.758	42.82
0.8204	32.78
0.7605	20.252
0.7168	21.342
0.8594	43.389
0.7478	44.063
0.6642	18.986
0.6422	20.376
0.7752	60.545
0.8063	57.38
0.7738	45.982
0.7808	27.516
0.6369	23.946
0.7683	38.009
0.7422	37.809
0.8533	31.739
0.9126	29.865
0.6893	38.07
0.7964	51.796
0.7905	25.944
0.8816	42.89
0.8003	49.525
0.914	65.816
0.8034	46.293
0.8285	52.493
0.6762	18.398
0.6373	17.711
0.7384	45.826
0.5471	4.737
0.622	32.897
0.6386	29.339
0.5916	11.723
0.7292	30.979
0.4559	2.433
0.6723	11.139
0.6931	25.322
0.4692	0.237
0.4379	-7.113
0.6068	10.697
0.6273	24.814
0.7804	27
0.5853	16.462
0.4877	-2.544
0.3855	-18.297
0.4659	-6.156
0.3559	-35.673
0.2716	-35.44
0.4624	-1.705
0.305	-23.279
0.4128	-14.281
0.375	-7.237
0.5319	7.606
0.3859	-20.004
0.6768	25.083
0.3697	-10.674
0.2322	-35.01
0.191	-34.425
0.3237	-38.001
0.3892	-10.148
0.1756	-44.817
0.4529	-10.103
0.1322	-0.74
0.6381	13.074
0.3178	-24.129
0.624	5.795
0.2228	-6.205
0.5434	11.013
0.326	-16.555
0.5545	12.722
0.562	12.457
0.5205	-1.258
0.4088	-25.539
0.2551	-49.06
0.378	-27.325
0.4691	-13.878
0.4951	-8.513
0.5971	6.548
0.6077	30.167
0.6519	10.462
0.7228	23.002
0.4885	1.726
0.5594	3.837
0.3109	-21.845
0.2428	-36.151
0.372	-11.748
0.4144	-14.158
0.1536	-64.786
0.1135	-41.631
0.2944	-21.512
0.1413	-62.83
0.1982	-54.984
0.1323	-33.157
0.1004	-77.729
0.1967	-47.704
0.2354	-42.395

## Sheet: Panel D
Labels	Mean Trained	Mean Untrained	CI Trained	CI Untrained
N2	0.70385	0.60046	0.0402116	0.0474622
ceh-36	0.57714	0.61527	0.152538	0.0621415
