# Supplementary material for: The nematode worm C. elegans chooses between bacterial foods as if maximizing economic utility
Source: eLife. 2023 Apr 25;12:e69779. doi: 10.7554/eLife.69779 (PMC10231927; doi:10.7554/eLife.69779)
Supplement: Figure 8—source data 1. [file elife-69779-fig8-data1.xlsx]

## Sheet: Panel A
Time (sec)	H Naïve	M Naïve	H Trained	M Trained
0	0.063	0.028	0.31	0.24
0.1	0.046	0.027	0.309	0.202
0.2	0.077	0.014	0.305	0.183
0.3	0.058	0.034	0.287	0.181
0.4	0.038	0.042	0.283	0.179
0.5	0.055	0.053	0.284	0.18
0.6	0.044	0.062	0.273	0.181
0.7	0.04	0.082	0.267	0.171
0.8	0.09	0.106	0.24	0.16
0.9	0.101	0.097	0.235	0.133
1	0.101	0.112	0.227	0.133
1.1	0.109	0.12	0.222	0.115
1.2	0.078	0.124	0.226	0.099
1.3	0.058	0.121	0.223	0.113
1.4	0.063	0.116	0.222	0.133
1.5	0.035	0.115	0.231	0.139
1.6	0.021	0.115	0.225	0.133
1.7	-0.016	0.102	0.203	0.145
1.8	0.014	0.093	0.186	0.142
1.9	0.024	0.101	0.171	0.178
2	0.017	0.104	0.158	0.172
2.1	-0.047	0.089	0.154	0.162
2.2	0.027	0.096	0.162	0.131
2.3	0.037	0.086	0.178	0.096
2.4	0.041	0.082	0.189	0.083
2.5	0.052	0.082	0.189	0.071
2.6	0.054	0.069	0.189	0.066
2.7	0.062	0.039	0.196	0.069
2.8	0.045	0.021	0.193	0.061
2.9	0.044	0.029	0.2	0.104
3	0.052	0.013	0.214	0.138
3.1	0.055	0.019	0.213	0.165
3.2	0.048	0.004	0.222	0.151
3.3	0.025	-0.008	0.23	0.146
3.4	-0.002	-0.026	0.245	0.155
3.5	-0.039	-0.032	0.249	0.116
3.6	-0.032	-0.008	0.238	0.082
3.7	0.002	0.005	0.231	0.08
3.8	0.009	-0.009	0.219	0.07
3.9	0.011	0.006	0.228	0.088
4	0.026	0.007	0.214	0.069
4.1	0.009	0.02	0.2	0.075
4.2	0.011	0.01	0.206	0.062
4.3	0.029	0.008	0.202	0.076
4.4	0.023	0.006	0.196	0.081
4.5	0.025	0.016	0.199	0.068
4.6	0.04	-0.006	0.181	0.051
4.7	0.027	-0.025	0.155	0.054
4.8	-0.036	-0.041	0.144	0.051
4.9	-0.043	-0.045	0.15	0.052
5	-0.074	-0.066	0.123	0.017
5.1	-0.098	-0.062	0.072	-0.04
5.2	-0.133	-0.064	0.062	-0.038
5.3	-0.145	-0.049	0.059	-0.043
5.4	-0.128	-0.022	0.06	-0.038
5.5	-0.137	-0.028	0.056	-0.012
5.6	-0.115	-0.015	0.062	0.016
5.7	-0.094	-0.023	0.063	0.012
5.8	-0.061	-0.029	0.061	-0.036
5.9	-0.03	-0.013	0.08	-0.054
6	0.068	-0.012	0.094	-0.057
6.1	0.087	0.004	0.093	-0.065
6.2	0.114	0.011	0.088	-0.047
6.3	0.13	0.001	0.085	-0.076
6.4	0.125	0.009	0.088	-0.052
6.5	0.116	-0.008	0.085	-0.059
6.6	0.119	-0.01	0.082	-0.054
6.7	0.115	0.006	0.066	-0.069
6.8	0.096	-0.004	0.058	-0.045
6.9	0.079	-0.007	0.072	-0.046
7	0.045	0.001	0.074	-0.032
7.1	0.031	-0.011	0.073	-0.049
7.2	0.041	-0.002	0.063	-0.029
7.3	0.007	0.003	0.046	-0.03
7.4	-0.011	-0.042	0.053	-0.027
7.5	-0.028	-0.012	0.039	-0.033
7.6	-0.041	-0.021	0.029	-0.049
7.7	-0.048	-0.038	0.022	-0.066
7.8	-0.045	-0.067	-0.014	-0.072
7.9	-0.06	-0.115	-0.034	-0.065
8	-0.098	-0.103	-0.053	-0.07
8.1	-0.103	-0.134	-0.073	-0.04
8.2	-0.09	-0.151	-0.102	-0.043
8.3	-0.105	-0.121	-0.129	-0.06
8.4	-0.12	-0.085	-0.148	-0.092
8.5	-0.133	-0.112	-0.169	-0.105
8.6	-0.137	-0.118	-0.19	-0.077
8.7	-0.156	-0.125	-0.209	-0.1
8.8	-0.123	-0.144	-0.233	-0.119
8.9	-0.139	-0.145	-0.251	-0.132
9	-0.128	-0.156	-0.256	-0.131
9.1	-0.151	-0.165	-0.27	-0.143
9.2	-0.179	-0.161	-0.283	-0.152
9.3	-0.185	-0.149	-0.287	-0.162
9.4	-0.189	-0.167	-0.296	-0.189
9.5	-0.209	-0.172	-0.303	-0.191
9.6	-0.219	-0.184	-0.311	-0.178
9.7	-0.226	-0.203	-0.329	-0.18
9.8	-0.25	-0.207	-0.329	-0.189
9.9	-0.227	-0.213	-0.341	-0.199
10	-0.226	-0.221	-0.348	-0.216
10.1	-0.233	-0.209	-0.356	-0.206
10.2	-0.246	-0.231	-0.364	-0.218
10.3	-0.243	-0.212	-0.37	-0.218
10.4	-0.253	-0.221	-0.384	-0.218
10.5	-0.254	-0.218	-0.391	-0.224
10.6	-0.249	-0.233	-0.394	-0.204
10.7	-0.228	-0.239	-0.399	-0.213
10.8	-0.264	-0.254	-0.406	-0.209
10.9	-0.26	-0.255	-0.412	-0.201
11	-0.275	-0.265	-0.403	-0.212
11.1	-0.274	-0.295	-0.414	-0.223
11.2	-0.279	-0.298	-0.423	-0.229
11.3	-0.269	-0.306	-0.423	-0.236
11.4	-0.272	-0.309	-0.428	-0.222
11.5	-0.278	-0.311	-0.432	-0.213
11.6	-0.314	-0.317	-0.445	-0.218
11.7	-0.322	-0.319	-0.448	-0.241
11.8	-0.331	-0.331	-0.45	-0.255
11.9	-0.344	-0.329	-0.456	-0.248
12	-0.336	-0.321	-0.454	-0.269
12.1	-0.333	-0.326	-0.457	-0.267
12.2	-0.349	-0.325	-0.445	-0.278
12.3	-0.337	-0.315	-0.453	-0.273
12.4	-0.341	-0.317	-0.462	-0.273
12.5	-0.338	-0.321	-0.468	-0.278
12.6	-0.365	-0.33	-0.462	-0.281
12.7	-0.36	-0.321	-0.464	-0.295
12.8	-0.366	-0.319	-0.457	-0.269
12.9	-0.367	-0.312	-0.469	-0.274
13	-0.368	-0.336	-0.472	-0.276
13.1	-0.404	-0.33	-0.469	-0.259
13.2	-0.416	-0.333	-0.461	-0.251
13.3	-0.418	-0.339	-0.466	-0.254
13.4	-0.42	-0.331	-0.468	-0.265
13.5	-0.438	-0.356	-0.478	-0.285
13.6	-0.425	-0.346	-0.487	-0.27
13.7	-0.406	-0.347	-0.491	-0.277
13.8	-0.399	-0.337	-0.491	-0.272
13.9	-0.404	-0.335	-0.479	-0.284
14	-0.394	-0.347	-0.502	-0.277
14.1	-0.4	-0.333	-0.498	-0.285
14.2	-0.422	-0.342	-0.498	-0.266
14.3	-0.431	-0.359	-0.501	-0.244
14.4	-0.418	-0.364	-0.5	-0.224
14.5	-0.377	-0.348	-0.495	-0.205
14.6	-0.381	-0.369	-0.492	-0.217
14.7	-0.36	-0.363	-0.478	-0.222
14.8	-0.365	-0.365	-0.49	-0.241
14.9	-0.382	-0.368	-0.494	-0.238
15	-0.4	-0.374	-0.489	-0.236
15.1	-0.409	-0.382	-0.496	-0.231
15.2	-0.413	-0.358	-0.491	-0.225
15.3	-0.424	-0.367	-0.49	-0.215
15.4	-0.424	-0.356	-0.49	-0.213
15.5	-0.42	-0.355	-0.495	-0.215
15.6	-0.42	-0.349	-0.497	-0.215
15.7	-0.44	-0.352	-0.495	-0.218
15.8	-0.444	-0.352	-0.5	-0.216
15.9	-0.444	-0.348	-0.503	-0.216
16	-0.448	-0.329	-0.499	-0.221
16.1	-0.441	-0.319	-0.5	-0.241
16.2	-0.445	-0.314	-0.5	-0.227
16.3	-0.44	-0.333	-0.503	-0.222
16.4	-0.452	-0.363	-0.507	-0.209
16.5	-0.453	-0.336	-0.506	-0.16
16.6	-0.448	-0.327	-0.514	-0.143
16.7	-0.467	-0.335	-0.519	-0.145
16.8	-0.459	-0.328	-0.511	-0.168
16.9	-0.467	-0.332	-0.513	-0.141
17	-0.456	-0.331	-0.514	-0.155
17.1	-0.465	-0.342	-0.517	-0.146
17.2	-0.455	-0.33	-0.524	-0.133
17.3	-0.454	-0.345	-0.52	-0.145
17.4	-0.454	-0.348	-0.529	-0.251
17.5	-0.465	-0.351	-0.528	-0.216
17.6	-0.465	-0.357	-0.53	-0.209
17.7	-0.463	-0.369	-0.542	-0.222
17.8	-0.466	-0.386	-0.541	-0.191
17.9	-0.472	-0.376	-0.541	-0.198
18	-0.49	-0.365	-0.544	-0.213
18.1	-0.47	-0.362	-0.544	-0.198
18.2	-0.459	-0.354	-0.543	-0.176
18.3	-0.446	-0.349	-0.548	-0.151
18.4	-0.443	-0.35	-0.545	-0.136
18.5	-0.453	-0.363	-0.537	-0.165
18.6	-0.457	-0.364	-0.537	-0.17
18.7	-0.463	-0.38	-0.543	-0.141
18.8	-0.458	-0.371	-0.542	-0.161
18.9	-0.443	-0.384	-0.537	-0.163
19	-0.442	-0.372	-0.55	-0.165
19.1	-0.451	-0.354	-0.54	-0.193
19.2	-0.435	-0.363	-0.552	-0.178
19.3	-0.433	-0.36	-0.545	-0.172
19.4	-0.434	-0.361	-0.545	-0.183
19.5	-0.456	-0.355	-0.543	-0.175
19.6	-0.449	-0.348	-0.548	-0.165
19.7	-0.462	-0.376	-0.54	-0.164
19.8	-0.462	-0.368	-0.543	-0.177
19.9	-0.469	-0.36	-0.544	-0.185
20	-0.462	-0.363	-0.545	-0.19
20.1	-0.461	-0.365	-0.537	-0.184
20.2	-0.477	-0.369	-0.541	-0.177
20.3	-0.467	-0.369	-0.551	-0.191
20.4	-0.482	-0.35	-0.542	-0.177
20.5	-0.484	-0.343	-0.543	-0.185
20.6	-0.493	-0.363	-0.544	-0.208
20.7	-0.486	-0.362	-0.54	-0.208
20.8	-0.495	-0.356	-0.54	-0.217
20.9	-0.492	-0.356	-0.539	-0.228
21	-0.501	-0.359	-0.548	-0.23
21.1	-0.498	-0.338	-0.539	-0.255
21.2	-0.476	-0.359	-0.54	-0.238
21.3	-0.499	-0.354	-0.54	-0.23
21.4	-0.503	-0.373	-0.54	-0.236
21.5	-0.511	-0.383	-0.54	-0.226
21.6	-0.507	-0.387	-0.536	-0.227
21.7	-0.506	-0.407	-0.538	-0.236
21.8	-0.511	-0.396	-0.525	-0.242
21.9	-0.504	-0.404	-0.531	-0.237
22	-0.51	-0.407	-0.528	-0.249
22.1	-0.504	-0.401	-0.534	-0.277
22.2	-0.506	-0.384	-0.53	-0.262
22.3	-0.489	-0.398	-0.537	-0.261
22.4	-0.509	-0.423	-0.522	-0.279
22.5	-0.499	-0.422	-0.535	-0.275
22.6	-0.482	-0.405	-0.54	-0.277
22.7	-0.482	-0.419	-0.541	-0.266
22.8	-0.499	-0.392	-0.535	-0.275
22.9	-0.506	-0.4	-0.527	-0.275
23	-0.5	-0.407	-0.538	-0.276
23.1	-0.501	-0.393	-0.534	-0.281
23.2	-0.507	-0.403	-0.531	-0.274
23.3	-0.515	-0.404	-0.528	-0.278
23.4	-0.507	-0.406	-0.534	-0.281
23.5	-0.494	-0.406	-0.534	-0.275
23.6	-0.493	-0.423	-0.537	-0.276
23.7	-0.475	-0.419	-0.544	-0.278
23.8	-0.469	-0.419	-0.539	-0.268
23.9	-0.474	-0.414	-0.535	-0.266
24	-0.461	-0.409	-0.544	-0.275
24.1	-0.461	-0.413	-0.532	-0.283
24.2	-0.454	-0.416	-0.534	-0.294
24.3	-0.457	-0.416	-0.533	-0.296
24.4	-0.455	-0.407	-0.54	-0.32
24.5	-0.482	-0.411	-0.53	-0.319
24.6	-0.483	-0.404	-0.54	-0.33
24.7	-0.467	-0.405	-0.549	-0.308
24.8	-0.468	-0.408	-0.548	-0.301
24.9	-0.461	-0.409	-0.536	-0.323
25	-0.469	-0.369	-0.525	-0.33
25.1	-0.474	-0.341	-0.523	-0.338
25.2	-0.478	-0.347	-0.532	-0.346
25.3	-0.466	-0.36	-0.538	-0.345
25.4	-0.465	-0.369	-0.522	-0.349
25.5	-0.459	-0.369	-0.537	-0.341
25.6	-0.471	-0.363	-0.521	-0.354
25.7	-0.458	-0.366	-0.546	-0.331
25.8	-0.466	-0.365	-0.518	-0.345
25.9	-0.468	-0.361	-0.522	-0.34
26	-0.465	-0.343	-0.52	-0.334
26.1	-0.451	-0.358	-0.543	-0.336
26.2	-0.455	-0.351	-0.544	-0.332
26.3	-0.458	-0.347	-0.536	-0.329
26.4	-0.454	-0.349	-0.568	-0.327
26.5	-0.449	-0.37	-0.563	-0.327
26.6	-0.456	-0.369	-0.556	-0.32
26.7	-0.449	-0.368	-0.548	-0.316
26.8	-0.455	-0.353	-0.563	-0.294
26.9	-0.453	-0.356	-0.557	-0.293
27	-0.452	-0.344	-0.539	-0.312
27.1	-0.454	-0.35	-0.539	-0.304
27.2	-0.455	-0.343	-0.531	-0.295
27.3	-0.465	-0.339	-0.54	-0.299
27.4	-0.446	-0.358	-0.54	-0.273
27.5	-0.448	-0.361	-0.543	-0.293
27.6	-0.447	-0.362	-0.548	-0.285
27.7	-0.439	-0.346	-0.56	-0.294
27.8	-0.449	-0.362	-0.54	-0.298
27.9	-0.448	-0.377	-0.541	-0.304
28	-0.459	-0.369	-0.539	-0.316
28.1	-0.47	-0.371	-0.549	-0.303
28.2	-0.442	-0.371	-0.572	-0.313
28.3	-0.446	-0.373	-0.541	-0.31
28.4	-0.45	-0.375	-0.548	-0.294
28.5	-0.45	-0.369	-0.542	-0.289
28.6	-0.441	-0.365	-0.546	-0.302
28.7	-0.437	-0.362	-0.551	-0.299
28.8	-0.448	-0.37	-0.556	-0.311
28.9	-0.453	-0.358	-0.566	-0.316
29	-0.445	-0.363	-0.554	-0.305
29.1	-0.454	-0.362	-0.558	-0.296
29.2	-0.442	-0.373	-0.568	-0.264
29.3	-0.456	-0.36	-0.553	-0.245
29.4	-0.44	-0.355	-0.549	-0.212
29.5	-0.439	-0.366	-0.568	-0.189
29.6	-0.427	-0.387	-0.549	-0.171
29.7	-0.455	-0.368	-0.551	-0.165
29.8	-0.45	-0.378	-0.546	-0.169
29.9	-0.45	-0.367	-0.542	-0.146
30	-0.444	-0.364	-0.544	-0.12
30.1	-0.446	-0.37	-0.548	-0.107
30.2	-0.452	-0.363	-0.537	-0.092
30.3	-0.45	-0.362	-0.542	-0.128
30.4	-0.457	-0.345	-0.539	-0.147
30.5	-0.444	-0.352	-0.525	-0.158
30.6	-0.46	-0.356	-0.535	-0.118
30.7	-0.447	-0.361	-0.53	-0.115
30.8	-0.43	-0.355	-0.534	-0.125
30.9	-0.434	-0.368	-0.533	-0.126
31	-0.452	-0.364	-0.54	-0.125
31.1	-0.438	-0.369	-0.535	-0.103
31.2	-0.452	-0.372	-0.543	-0.121
31.3	-0.452	-0.381	-0.545	-0.117
31.4	-0.45	-0.364	-0.54	-0.15
31.5	-0.425	-0.382	-0.544	-0.15
31.6	-0.438	-0.379	-0.543	-0.161
31.7	-0.459	-0.374	-0.542	-0.173
31.8	-0.461	-0.403	-0.538	-0.172
31.9	-0.458	-0.413	-0.535	-0.178
32	-0.448	-0.417	-0.534	-0.2

## Sheet: Panel B
Labels	Mean integral H	M integral M	CI integral H	Ci integral M
Untrained	-87.62	-74.65	26.2929	33.0063
Trained	-105.29	-56.61	33.3661	57.6324

## Sheet: Panel C
Time (sec)	Mean H Untrained	Mean M Untrained	Mean H Trained	Mean M Trained
0	0.263	-0.055	-0.003	0.007
0.1	0.245	-0.041	-0.001	0
0.2	0.217	-0.04	-0.012	0.026
0.3	0.168	-0.034	-0.015	-0.012
0.4	0.162	-0.043	-0.016	-0.016
0.5	0.006	-0.049	-0.014	0.004
0.6	0.005	-0.034	-0.015	-0.02
0.7	-0.023	-0.053	-0.026	-0.021
0.8	-0.029	-0.066	-0.028	-0.033
0.9	-0.026	-0.054	-0.043	-0.044
1	-0.012	-0.05	-0.028	-0.008
1.1	-0.02	-0.041	-0.034	-0.016
1.2	-0.014	-0.036	-0.033	-0.02
1.3	-0.023	-0.055	-0.045	-0.03
1.4	-0.028	-0.049	-0.053	-0.023
1.5	0.012	-0.065	-0.02	0.023
1.6	0.01	-0.022	-0.019	-0.019
1.7	-0.01	-0.023	-0.033	-0.028
1.8	-0.024	-0.001	-0.048	-0.046
1.9	-0.025	-0.002	-0.041	-0.039
2	-0.014	-0.011	-0.044	-0.03
2.1	-0.009	-0.004	-0.043	0.01
2.2	-0.001	-0.008	-0.049	-0.001
2.3	-0.01	-0.029	-0.039	-0.009
2.4	-0.016	-0.011	-0.04	0.005
2.5	-0.014	-0.027	-0.031	0.032
2.6	0.002	-0.028	-0.049	0.05
2.7	-0.009	-0.014	-0.033	0.033
2.8	0.002	-0.035	-0.03	0.028
2.9	-0.01	-0.062	-0.052	0.019
3	-0.003	-0.082	-0.046	0.021
3.1	-0.026	-0.104	-0.06	0
3.2	-0.016	-0.1	-0.066	0.002
3.3	-0.028	-0.091	-0.064	-0.006
3.4	-0.029	-0.088	-0.077	0.012
3.5	-0.044	-0.073	-0.062	-0.013
3.6	-0.033	-0.076	-0.066	-0.002
3.7	0.008	-0.075	-0.059	0.004
3.8	-0.016	-0.07	-0.047	0.015
3.9	-0.01	-0.05	-0.03	0.014
4	-0.009	-0.07	-0.031	-0.008
4.1	-0.011	-0.057	-0.014	0.003
4.2	-0.001	-0.069	-0.031	0.015
4.3	-0.008	-0.059	-0.032	-0.006
4.4	-0.003	-0.067	-0.041	-0.018
4.5	-0.007	-0.057	-0.041	-0.015
4.6	-0.004	-0.062	-0.024	0.002
4.7	0.004	-0.056	-0.038	-0.001
4.8	-0.012	-0.052	-0.025	-0.007
4.9	-0.021	-0.029	-0.018	-0.001
5	-0.006	-0.016	-0.03	0
5.1	-0.043	-0.022	-0.093	-0.049
5.2	-0.034	-0.036	-0.096	-0.043
5.3	-0.039	-0.044	-0.089	-0.024
5.4	-0.04	-0.055	-0.073	-0.024
5.5	-0.036	-0.053	-0.058	-0.008
5.6	-0.023	-0.056	-0.054	0.005
5.7	-0.028	-0.064	-0.052	0.01
5.8	-0.021	-0.069	-0.061	0.004
5.9	-0.02	-0.043	-0.036	0.018
6	-0.026	-0.042	-0.053	0.009
6.1	-0.055	-0.029	-0.052	-0.01
6.2	-0.048	-0.04	-0.044	-0.038
6.3	-0.066	-0.046	-0.058	-0.053
6.4	-0.072	-0.039	-0.058	-0.064
6.5	-0.046	-0.023	-0.058	-0.047
6.6	-0.06	-0.023	-0.063	-0.048
6.7	-0.03	-0.029	-0.056	-0.04
6.8	-0.023	0.003	-0.046	0.014
6.9	-0.005	0.054	-0.043	0.12
7	0.012	0.155	-0.005	0.305
7.1	0.044	0.346	0.02	0.612
7.2	0.195	0.586	0.131	0.99
7.3	0.486	0.9	0.334	1.336
7.4	1.077	1.209	0.706	1.622
7.5	1.841	1.511	1.284	1.836
7.6	2.869	1.722	1.974	2.005
7.7	3.836	1.96	2.613	2.128
7.8	4.561	2.108	3.089	2.217
7.9	4.78	2.291	3.479	2.311
8	4.995	2.404	3.861	2.438
8.1	5.088	2.432	4.12	2.558
8.2	4.993	2.344	4.365	2.598
8.3	4.657	2.447	4.633	2.591
8.4	4.434	2.414	4.742	2.631
8.5	4.303	2.43	4.656	2.609
8.6	4.407	2.399	4.666	2.607
8.7	4.441	2.424	4.76	2.623
8.8	4.437	2.449	4.851	2.671
8.9	4.398	2.467	4.987	2.745
9	4.388	2.527	5.078	2.792
9.1	4.339	2.505	5.115	2.782
9.2	4.324	2.413	5.207	2.735
9.3	4.323	2.402	5.211	2.676
9.4	4.237	2.394	5.226	2.642
9.5	4.224	2.382	5.169	2.619
9.6	4.204	2.307	5.124	2.636
9.7	4.183	2.449	5.055	2.73
9.8	4.077	2.534	5.092	2.754
9.9	4.001	2.63	5.089	2.763
10	3.942	2.662	5.078	2.808
10.1	3.905	2.628	5.065	2.842
10.2	3.853	2.628	5.083	2.812
10.3	3.793	2.618	5.097	2.788
10.4	3.786	2.585	5.087	2.758
10.5	3.765	2.56	5.074	2.618
10.6	3.708	2.554	5.09	2.6
10.7	3.684	2.532	5.087	2.599
10.8	3.628	2.491	5.061	2.57
10.9	3.618	2.496	5.043	2.549
11	3.532	2.517	5.015	2.503
11.1	3.423	2.578	5.002	2.463
11.2	3.341	2.525	4.991	2.42
11.3	3.265	2.459	4.949	2.376
11.4	3.249	2.414	4.904	2.377
11.5	3.172	2.391	4.889	2.356
11.6	3.077	2.427	4.858	2.377
11.7	3.047	2.427	4.84	2.352
11.8	2.997	2.381	4.838	2.348
11.9	2.981	2.35	4.807	2.299
12	2.997	2.275	4.766	2.371
12.1	2.983	2.247	4.76	2.375
12.2	2.963	2.217	4.733	2.326
12.3	2.947	2.178	4.703	2.279
12.4	2.92	2.118	4.698	2.251
12.5	2.87	2.075	4.718	2.237
12.6	2.793	2.08	4.641	2.202
12.7	2.71	2.059	4.637	2.316
12.8	2.726	2.025	4.635	2.294
12.9	2.677	2.053	4.594	2.26
13	2.66	2.011	4.555	2.235
13.1	2.664	2.021	4.545	2.191
13.2	2.752	1.998	4.537	2.125
13.3	2.759	1.935	4.52	2.071
13.4	2.695	1.902	4.504	2
13.5	2.62	1.927	4.445	2.001
13.6	2.516	1.916	4.372	2.009
13.7	2.481	1.867	4.347	1.974
13.8	2.456	1.849	4.314	1.939
13.9	2.458	1.796	4.285	1.944
14	2.399	1.824	4.266	1.991
14.1	2.332	1.814	4.235	2.023
14.2	2.261	1.788	4.209	2.031
14.3	2.206	1.795	4.132	2.016
14.4	2.167	1.784	4.071	2.015
14.5	2.136	1.753	4.02	2.004
14.6	2.09	1.766	3.997	1.999
14.7	2.06	1.773	3.992	1.989
14.8	2.041	1.713	3.965	1.985
14.9	1.998	1.677	3.928	1.952
15	1.979	1.651	3.897	1.92
15.1	1.97	1.64	3.857	1.87
15.2	1.953	1.656	3.856	1.831
15.3	1.982	1.665	3.813	1.903
15.4	1.974	1.656	3.765	1.884
15.5	1.987	1.634	3.736	1.827
15.6	1.997	1.621	3.705	1.783
15.7	1.996	1.588	3.692	1.728
15.8	1.99	1.521	3.707	1.793
15.9	1.984	1.539	3.707	1.741
16	1.983	1.533	3.69	1.682
16.1	1.949	1.491	3.728	1.662
16.2	1.943	1.448	3.71	1.691
16.3	1.941	1.408	3.651	1.704
16.4	1.935	1.369	3.642	1.728
16.5	1.925	1.351	3.579	1.715
16.6	1.904	1.314	3.534	1.712
16.7	1.869	1.349	3.489	1.69
16.8	1.818	1.327	3.438	1.643
16.9	1.77	1.303	3.388	1.621
17	1.748	1.273	3.296	1.604
17.1	1.712	1.246	3.261	1.595
17.2	1.662	1.259	3.284	1.619
17.3	1.626	1.256	3.294	1.523
17.4	1.592	1.21	3.259	1.477
17.5	1.609	1.176	3.236	1.468
17.6	1.586	1.159	3.2	1.486
17.7	1.58	1.095	3.142	1.486
17.8	1.507	1.047	3.104	1.499
17.9	1.536	1.032	3.062	1.493
18	1.529	1.035	3.052	1.526
18.1	1.486	1.028	3.034	1.52
18.2	1.493	1.026	3.027	1.489
18.3	1.431	1.043	3.007	1.471
18.4	1.441	1.02	2.992	1.426
18.5	1.426	1.008	2.931	1.422
18.6	1.395	1.002	2.879	1.4
18.7	1.372	1.009	2.826	1.412
18.8	1.364	0.994	2.789	1.37
18.9	1.37	0.979	2.781	1.34
19	1.351	0.967	2.77	1.356
19.1	1.363	0.951	2.778	1.408
19.2	1.374	0.935	2.8	1.378
19.3	1.368	0.923	2.769	1.282
19.4	1.367	0.896	2.759	1.261
19.5	1.334	0.898	2.752	1.276
19.6	1.332	0.911	2.718	1.253
19.7	1.33	0.882	2.686	1.185
19.8	1.33	0.859	2.681	1.117
19.9	1.313	0.857	2.669	1.111
20	1.339	0.887	2.652	1.093
20.1	1.34	0.877	2.646	1.083
20.2	1.3	0.845	2.615	1.094
20.3	1.285	0.829	2.596	1.084
20.4	1.26	0.837	2.565	1.082
20.5	1.23	0.821	2.54	1.077
20.6	1.231	0.8	2.499	1.095
20.7	1.135	0.807	2.456	1.096
20.8	1.105	0.813	2.462	1.147
20.9	1.153	0.824	2.473	1.146
21	1.216	0.816	2.454	1.154
21.1	1.227	0.789	2.438	1.221
21.2	1.235	0.785	2.422	1.243
21.3	1.246	0.782	2.386	1.219
21.4	1.249	0.786	2.355	1.259
21.5	1.277	0.77	2.324	1.282
21.6	1.252	0.772	2.302	1.199
21.7	1.206	0.772	2.299	1.178
21.8	1.214	0.762	2.275	1.176
21.9	1.204	0.779	2.243	1.152
22	1.194	0.782	2.239	1.192
22.1	1.18	0.824	2.223	1.197
22.2	1.193	0.854	2.242	1.195
22.3	1.138	0.85	2.274	1.184
22.4	1.065	0.847	2.264	1.179
22.5	1.078	0.83	2.234	1.187
22.6	1.104	0.803	2.207	1.194
22.7	1.135	0.805	2.229	1.189
22.8	1.127	0.812	2.221	1.17
22.9	1.088	0.799	2.214	1.138
23	1.08	0.803	2.164	1.085
23.1	1.072	0.798	2.152	1.077
23.2	1.069	0.788	2.13	1.064
23.3	1.085	0.762	2.139	1.029
23.4	1.103	0.756	2.13	0.997
23.5	1.131	0.751	2.129	1
23.6	1.131	0.737	2.111	1.048
23.7	1.117	0.702	2.125	1.025
23.8	1.095	0.725	2.14	0.975
23.9	1.092	0.724	2.112	0.953
24	1.103	0.739	2.117	0.895
24.1	1.101	0.732	2.125	0.892
24.2	1.115	0.738	2.128	0.883
24.3	1.118	0.715	2.116	0.895
24.4	1.123	0.713	2.103	0.885
24.5	1.126	0.676	2.079	0.917
24.6	1.131	0.672	2.049	0.927
24.7	1.171	0.649	2.044	0.944
24.8	1.169	0.66	2.015	0.937
24.9	1.166	0.686	1.98	0.936
25	1.169	0.695	1.977	0.914
25.1	1.193	0.707	1.937	0.912
25.2	1.176	0.694	1.931	0.922
25.3	1.199	0.699	1.923	0.895
25.4	1.173	0.679	1.92	0.889
25.5	1.234	0.663	1.885	0.883
25.6	1.203	0.674	1.907	0.879
25.7	1.155	0.639	1.905	0.873
25.8	1.154	0.613	1.895	0.86
25.9	1.088	0.626	1.901	0.852
26	1.056	0.663	1.894	0.845
26.1	1.066	0.669	1.899	0.828
26.2	1.063	0.678	1.893	0.826
26.3	1.088	0.689	1.902	0.841
26.4	1.06	0.695	1.83	0.863
26.5	1.064	0.677	1.793	0.852
26.6	1.064	0.671	1.781	0.863
26.7	1.066	0.633	1.734	0.862
26.8	1.054	0.604	1.716	0.858
26.9	1.057	0.599	1.715	0.844
27	1.034	0.556	1.653	0.848
27.1	1.023	0.563	1.691	0.802
27.2	1.025	0.551	1.694	0.795
27.3	1.019	0.552	1.707	0.801
27.4	1.009	0.541	1.694	0.814
27.5	0.965	0.539	1.665	0.796
27.6	0.968	0.534	1.654	0.779
27.7	0.924	0.515	1.663	0.813
27.8	0.927	0.491	1.648	0.84
27.9	0.905	0.494	1.676	0.871
28	0.92	0.484	1.659	0.859
28.1	0.929	0.481	1.693	0.829
28.2	0.941	0.489	1.666	0.773
28.3	0.952	0.497	1.631	0.751
28.4	0.954	0.477	1.605	0.752
28.5	0.883	0.47	1.597	0.776
28.6	0.894	0.455	1.603	0.827
28.7	0.889	0.45	1.586	0.801
28.8	0.856	0.454	1.57	0.685
28.9	0.875	0.46	1.56	0.595
29	0.86	0.45	1.542	0.657
29.1	0.858	0.437	1.528	0.738
29.2	0.861	0.425	1.503	0.735
29.3	0.874	0.418	1.504	0.776
29.4	0.88	0.423	1.478	0.803
29.5	0.881	0.411	1.466	0.793
29.6	0.849	0.398	1.466	0.821
29.7	0.794	0.38	1.456	0.807
29.8	0.813	0.381	1.485	0.751
29.9	0.834	0.354	1.513	0.714
30	0.823	0.351	1.51	0.643
30.1	0.805	0.346	1.511	0.595
30.2	0.858	0.331	1.506	0.575
30.3	0.828	0.356	1.476	0.572
30.4	0.794	0.372	1.467	0.568
30.5	0.82	0.387	1.475	0.569
30.6	0.801	0.4	1.459	0.57
30.7	0.803	0.426	1.457	0.556
30.8	0.874	0.451	1.406	0.538
30.9	0.887	0.444	1.401	0.507
31	0.883	0.462	1.39	0.507
31.1	0.899	0.469	1.38	0.483
31.2	0.857	0.476	1.387	0.463
31.3	0.83	0.474	1.376	0.476
31.4	0.845	0.468	1.375	0.498
31.5	0.897	0.463	1.391	0.508
31.6	0.948	0.46	1.382	0.5
31.7	1.011	0.444	1.339	0.515
31.8	1.105	0.43	1.317	0.513
31.9	1.18	0.438	1.289	0.552
32	1.13	0.442	1.258	0.545

## Sheet: Panel D
Labels	Mean integral H	M integral M	CI integral H	Ci integral M
Untrained	444.373	296.617	164.452	130.969
Trained	702.47	354.928	163.71	126.696
							a
