# Supplementary material for: The nematode worm C. elegans chooses between bacterial foods as if maximizing economic utility
Source: eLife. 2023 Apr 25;12:e69779. doi: 10.7554/eLife.69779 (PMC10231927; doi:10.7554/eLife.69779)
Supplement: Figure 9—source data 1. [file elife-69779-fig9-data1.xlsx]

## Sheet: Panel A
Time (sec)	H➞M Untrained	H➞M Trained	M➞H Untrained	M➞H Trained
-10	0.0235884	0.00974358	0.0349994	0.0592552
-9.9	0.021485	0.0112706	0.0419073	0.0578302
-9.8	0.0228747	0.00136894	0.0320763	0.0592766
-9.7	0.0242102	0.00249346	0.0437846	0.0449893
-9.6	0.0230232	0.00921327	0.0560643	0.0486446
-9.5	0.0243621	0.00419699	0.0199432	0.0607664
-9.4	0.0283314	0.00773729	0.0301008	0.0436923
-9.3	0.0268782	0.00840433	0.0386174	0.0494073
-9.2	0.0265331	0.00212157	0.0495855	0.0471688
-9.1	0.0181544	0.00183354	0.014473	0.0511973
-9	0.0159771	0.00673412	0.03797	0.0448836
-8.9	0.0179208	0.00706418	0.0127699	0.0543169
-8.8	0.0148559	0.0040845	0.0353003	0.0572042
-8.7	0.0165556	0.0047573	0.0250284	0.0571266
-8.6	0.0130964	0.0104994	0.0329404	0.0689935
-8.5	0.0154458	0.00875324	0.026903	0.0643376
-8.4	0.0119758	0.00421817	0.023159	0.0755479
-8.3	0.0119247	0.00251946	0.021631	0.0708195
-8.2	0.00974193	0.00758437	0.03546	0.0761503
-8.1	0.0138872	0.0081607	0.0242415	0.0815293
-8	0.00816647	0.00903303	0.0338827	0.0645758
-7.9	0.00810256	0.00962553	0.0249072	0.0831113
-7.8	0.00994683	0.00990062	0.0340148	0.0824471
-7.7	0.004056	0.0109933	0.00816213	0.0596918
-7.6	0.00316658	0.0102276	0.0234109	0.0579531
-7.5	0.00495835	0.00483045	0.024534	0.0649923
-7.4	0.00886105	0.0101657	0.00909791	0.0527675
-7.3	0.00679871	0.00528694	0.00783162	0.0546301
-7.2	0.00368729	-0.000392025	0.00543032	0.0410654
-7.1	0.00672548	-0.000635907	0.0376481	0.0507091
-7	0.0027946	0.000623377	0.0224651	0.0378869
-6.9	0.00986616	0.0011438	0.0242729	0.0317989
-6.8	0.00393364	0.00479289	0.012165	0.0388684
-6.7	0.00195086	0.00137749	0.049081	0.0241052
-6.6	0.00813697	0.00128427	0.0257347	0.0420515
-6.5	0.00245921	-0.00259106	0.0390957	0.0503471
-6.4	0.00659837	-0.00422495	0.0378259	0.0336475
-6.3	0.00577436	0.000663262	0.0343859	0.0511283
-6.2	0.0056689	0.00179111	0.0149462	0.037151
-6.1	0.00569352	0.000373837	0.037242	0.0381135
-6	0.00633904	0.0016298	0.0342764	0.0395601
-5.9	-0.00517234	0.00184071	0.0477822	0.0453867
-5.8	-0.000350603	0.000735349	0.0274666	0.0257562
-5.7	0.00309301	0.00224281	0.0309089	0.0336205
-5.6	0.00219784	-0.00368742	0.0314731	0.0304689
-5.5	-0.00180187	0.0007119	0.0211221	0.0282489
-5.4	-0.00426381	0.00227104	0.0127335	0.0347173
-5.3	-0.00296608	0.000993369	0.0230865	0.0367826
-5.2	-0.000748383	-0.0037605	0.0196059	0.0287974
-5.1	0.0063031	0.000698985	0.00955336	0.0354536
-5	0.00302784	-0.00492663	0.0305306	0.0266038
-4.9	-0.00476826	-0.000379161	0.0267837	0.0334242
-4.8	0.000505446	-0.00506759	0.024461	0.0336577
-4.7	0.00403281	-0.00189469	0.0131819	0.0341646
-4.6	-0.00597192	0.000711421	0.0202644	0.022017
-4.5	-0.000586762	-0.00134816	0.00660135	0.0322262
-4.4	-0.003952	-0.00224671	0.00648915	0.0208611
-4.3	-0.00382802	-0.00277536	0.0183882	0.0226633
-4.2	-0.00225661	-0.00836833	0.0198332	0.0330256
-4.1	-0.00421694	-0.00389573	0.00875985	0.0253374
-4	-0.00238237	-0.0047064	0.0280275	0.0252268
-3.9	-0.00453202	-0.00184795	0.00533062	0.022977
-3.8	-0.00565169	-0.00466069	0.00973882	0.0211263
-3.7	-0.00488901	-0.00425055	0.0103335	0.0319268
-3.6	0.00190512	-0.00185444	0.0214342	0.0197017
-3.5	-0.00380066	-0.00859581	0.00320671	0.0189839
-3.4	0.00116974	-0.00579998	0.0184643	0.0261384
-3.3	-0.000922257	-0.00351776	0.000139075	0.0291124
-3.2	-0.00687721	-0.00353794	0.0176371	0.03119
-3.1	0.00484699	0.00350595	0.0168276	0.0142414
-3	-0.0020657	-0.000268403	0.0165388	0.012915
-2.9	-0.00170111	0.000950499	-0.00231155	0.0223634
-2.8	0.00470511	-0.0032223	0.0023162	0.0175291
-2.7	0.00366272	-0.00613895	-0.0233697	0.00691201
-2.6	0.00436815	-0.00130053	-0.00160254	0.00145273
-2.5	0.00234551	-0.000861781	0.00350021	0.00938624
-2.4	0.000587364	0.000903005	-0.0114753	0.00648453
-2.3	-0.000131302	-0.00263951	-0.0122464	0.0137178
-2.2	0.00106693	0.00131865	0.016732	0.00715948
-2.1	0.00150899	-0.000843636	0.00316815	0.0105396
-2	0.00151987	-0.0022925	0.0171736	-0.00722929
-1.9	0.000223295	-0.00324636	-0.0206938	0.00404604
-1.8	0.000667969	-0.00259215	0.000990272	-0.00481648
-1.7	0.000675857	-0.00228886	-0.00102039	-0.00530918
-1.6	0.00134057	-0.00269545	-0.00274013	0.00705467
-1.5	0.000395216	-0.00438525	-0.000365679	0.02101
-1.4	0.000918931	-0.00349352	-0.0160333	-0.0116953
-1.3	0.000420764	-0.00260576	-0.00217175	-0.00147069
-1.2	0.00220777	-0.00311237	0.0106856	-0.00935963
-1.1	0.0014087	-0.00279454	-0.00436629	-0.00423372
-1	0.00331111	0.000434199	0.00796852	-0.00172387
-0.9	0.00177518	0.00220989	0.00828628	-0.00928898
-0.8	-0.00104585	0.00482044	0.00922406	-0.000539077
-0.7	0.000915125	0.00550024	-0.00600751	-0.0129256
-0.6	-0.000650523	0.0067866	0.00861495	-0.00143941
-0.5	0.00313845	0.013596	-0.00363537	-0.00303343
-0.4	-0.00356021	0.0121055	0.00695508	0.00720287
-0.3	0.00352916	0.0179281	0.00776603	0.00683866
-0.2	0.00581739	0.0198796	-0.0178582	0.00708906
-0.1	-0.00451074	0.0231067	-0.0059401	0.0092838
0	0.000351196	0.0248217	0.00917917	0.00845723
0.1	0.00141748	0.023468	-0.00691036	0.0169975
0.2	0.0101033	0.0217878	0.00580709	0.0138894
0.3	0.0139569	0.0302183	0.000912796	0.0100682
0.4	0.0235812	0.0362139	-0.00660768	0.0044153
0.5	0.0384145	0.0551521	-0.00660021	0.0137787
0.6	0.0485008	0.0764119	-0.00781338	0.00516933
0.7	0.0714669	0.0999105	-0.0106143	0.0144441
0.8	0.106194	0.121927	-0.00723785	0.0123385
0.9	0.126889	0.143148	-0.011752	0.0454098
1	0.15116	0.165948	0.0147525	0.0492252
1.1	0.173204	0.193302	-0.0136224	0.0541812
1.2	0.193211	0.218848	0.0130276	0.0491566
1.3	0.207407	0.251066	-0.00120675	0.0447981
1.4	0.221839	0.280509	0.00439893	0.033805
1.5	0.233812	0.31024	0.00480515	0.0312904
1.6	0.243886	0.324221	0.0182622	0.016788
1.7	0.248849	0.347573	0.00581092	0.0318836
1.8	0.250976	0.368868	-0.00207776	0.0190644
1.9	0.25091	0.387089	0.0116873	0.025727
2	0.254539	0.399188	0.0145398	0.0272822
2.1	0.253115	0.404193	0.0127886	0.0293332
2.2	0.250927	0.408875	-0.000625513	0.032801
2.3	0.245104	0.41633	0.00139582	0.02717
2.4	0.245649	0.418535	0.00882104	0.0327166
2.5	0.237047	0.420817	0.0090979	0.0245553
2.6	0.237648	0.423008	0.00506828	0.0253945
2.7	0.230339	0.423902	0.00172858	0.0174561
2.8	0.23002	0.424326	0.000938362	0.0179022
2.9	0.229007	0.416908	-0.0161464	0.0132315
3	0.230209	0.419482	-0.0142269	0.00623616
3.1	0.224074	0.421317	-0.00137707	0.019383
3.2	0.22061	0.437718	-0.00912174	0.0195001
3.3	0.218324	0.449912	0.00146033	0.0083877
3.4	0.215661	0.457535	0.00667577	0.00721274
3.5	0.211231	0.460683	0.0086266	0.0134599
3.6	0.205413	0.469352	0.0148987	0.00579828
3.7	0.201063	0.46739	0.013243	0.00316705
3.8	0.196193	0.466476	0.0258841	-0.00600019
3.9	0.196142	0.463645	0.0233491	-0.00617019
4	0.187945	0.461443	0.0228021	-0.0030785
4.1	0.185049	0.458175	0.0236255	0.0119919
4.2	0.180404	0.451927	0.00977679	-0.00209536
4.3	0.176329	0.443961	0.0248139	-0.0104418
4.4	0.172136	0.434913	0.0234862	-0.00486318
4.5	0.17017	0.429279	0.0274789	-0.00836839
4.6	0.164847	0.419913	0.030555	-0.00647792
4.7	0.167507	0.409217	0.0263741	-0.00662614
4.8	0.16136	0.402362	0.021826	-0.0118887
4.9	0.15728	0.397575	0.0234628	-0.0127185
5	0.1542	0.390272	0.0203474	-0.0293597
5.1	0.15152	0.3845	0.0175058	-0.00206587
5.2	0.154645	0.381797	0.0166078	-0.0261739
5.3	0.146799	0.375422	0.0166337	-0.0221909
5.4	0.143871	0.36224	0.02179	-0.0294288
5.5	0.142049	0.355205	0.02144	-0.0325933
5.6	0.146615	0.345996	0.00865744	-0.0261654
5.7	0.138562	0.340043	0.0160658	-0.0155608
5.8	0.135569	0.334137	0.0199938	-0.0189396
5.9	0.134639	0.333312	0.0217421	-0.0255574
6	0.137191	0.323905	0.0124401	-0.031205
6.1	0.134779	0.321004	0.020571	-0.0366408
6.2	0.128725	0.31658	0.0188456	-0.0279111
6.3	0.126778	0.314455	0.0195809	-0.0281778
6.4	0.129932	0.308784	0.003711	-0.0308242
6.5	0.124932	0.299661	0.0114785	-0.0280289
6.6	0.122839	0.295636	0.0187021	-0.0368756
6.7	0.126548	0.28963	0.0128822	-0.0351107
6.8	0.120704	0.283905	0.00732308	-0.0340463
6.9	0.1184	0.282043	0.00559894	-0.0298196
7	0.117572	0.270447	0.00491592	-0.023959
7.1	0.116853	0.269814	0.0161768	-0.0287636
7.2	0.120135	0.266057	0.0145982	-0.0319918
7.3	0.118814	0.258472	0.00690686	-0.0256219
7.4	0.116813	0.254634	-0.00487127	-0.0249789
7.5	0.120154	0.246232	0.000110195	-0.0279957
7.6	0.112993	0.245981	0.00477115	-0.0375646
7.7	0.106713	0.24532	0.0148325	-0.0404233
7.8	0.114262	0.246371	-0.00410957	-0.031077
7.9	0.107986	0.239985	0.0143864	-0.0471292
8	0.106452	0.237537	0.000404921	-0.038138
8.1	0.104211	0.229749	0.000885188	-0.0337185
8.2	0.10298	0.229719	0.0120263	-0.0357882
8.3	0.101013	0.22116	0.012307	-0.0371458
8.4	0.0963399	0.224684	0.00973196	-0.0399787
8.5	0.0964751	0.221122	-0.00323226	-0.0512454
8.6	0.0945907	0.211322	0.00911963	-0.0357732
8.7	0.0920034	0.216227	-0.0103913	-0.0511635
8.8	0.0881991	0.212994	0.00888805	-0.0547463
8.9	0.0867551	0.210982	-0.00858748	-0.0478402
9	0.0910669	0.211592	-0.0215794	-0.0571126
9.1	0.0897695	0.210353	-0.014869	-0.0409031
9.2	0.0859003	0.199136	-0.0084893	-0.0487224
9.3	0.089635	0.209015	-0.0162205	-0.0599528
9.4	0.0894898	0.202475	-0.00937428	-0.0553472
9.5	0.086987	0.201327	-0.0123338	-0.0459895
9.6	0.0865025	0.19563	-0.00405666	-0.0586156
9.7	0.0869911	0.196024	-0.0157097	-0.0541842
9.8	0.090072	0.194261	-0.0146846	-0.0541563
9.9	0.0850489	0.191262	-0.0126889	-0.0540119
10	0.0780544	0.189898	0.00016813	-0.0555308
10.1	0.0808555	0.189152	-0.0153548	-0.0444819
10.2	0.0807511	0.182887	-0.00310602	-0.0606211
10.3	0.0868407	0.181539	-0.00303462	-0.0484132
10.4	0.0833976	0.179778	-0.0088543	-0.0461279
10.5	0.0839433	0.178476	-0.00655156	-0.0427095
10.6	0.0761807	0.175592	-0.0135133	-0.0448874
10.7	0.0773789	0.169786	-0.0135136	-0.0486224
10.8	0.073496	0.171556	-0.0131018	-0.0481429
10.9	0.0782309	0.170258	-0.0165214	-0.0487331
11	0.0774812	0.171459	-0.0201209	-0.0387087
11.1	0.07508	0.168619	-0.017565	-0.0450343
11.2	0.0755444	0.165646	-0.0207088	-0.0429488
11.3	0.0662843	0.164718	-0.012063	-0.0456259
11.4	0.0737339	0.162694	-0.0305647	-0.0518721
11.5	0.0757716	0.159507	-0.0261713	-0.0557802
11.6	0.0734525	0.160141	-0.0317027	-0.0501151
11.7	0.0723182	0.157771	-0.0254418	-0.0543188
11.8	0.0670045	0.153728	-0.026732	-0.045935
11.9	0.0656913	0.150841	-0.0292698	-0.049498
12	0.0650899	0.144724	-0.0292472	-0.0410876
12.1	0.0594347	0.150423	-0.0299454	-0.0410822
12.2	0.0644341	0.145387	-0.0293039	-0.0463228
12.3	0.0634258	0.143315	-0.031811	-0.0461713
12.4	0.0594005	0.138104	-0.0327602	-0.0565353
12.5	0.0575185	0.140934	-0.0358932	-0.0489654
12.6	0.0601733	0.135453	-0.0361134	-0.0574909
12.7	0.05804	0.137972	-0.0347812	-0.0545995
12.8	0.0625239	0.134459	-0.0316502	-0.0512846
12.9	0.0609893	0.133699	-0.0349074	-0.0525346
13	0.0561136	0.134428	-0.0318834	-0.0578886
13.1	0.0557447	0.132988	-0.0354935	-0.0519321
13.2	0.0561146	0.130847	-0.0391471	-0.0551669
13.3	0.0517121	0.130555	-0.0341051	-0.0521273
13.4	0.0504308	0.127674	-0.0251313	-0.0537411
13.5	0.0541668	0.120642	-0.0299053	-0.0555405
13.6	0.054743	0.122022	-0.035772	-0.0573225
13.7	0.0538789	0.12299	-0.0277453	-0.054871
13.8	0.0529593	0.121108	-0.0249762	-0.0613865
13.9	0.0378065	0.119373	-0.027534	-0.0621171
14	0.0414291	0.122117	-0.0261865	-0.064452
14.1	0.0435034	0.123265	-0.0330457	-0.0638249
14.2	0.0404342	0.11449	-0.0178693	-0.0633246
14.3	0.0415147	0.115056	-0.0355162	-0.0718732
14.4	0.0408914	0.117482	-0.0228357	-0.0597577
14.5	0.0332417	0.110379	-0.0233582	-0.0574041
14.6	0.0402452	0.114217	-0.0216373	-0.0637997
14.7	0.0337542	0.111184	-0.0385756	-0.0635164
14.8	0.0376289	0.112183	-0.0252785	-0.0634628
14.9	0.0378028	0.110965	-0.028212	-0.0715917
15	0.0367737	0.11275	-0.0290891	-0.0735319
15.1	0.0374363	0.106656	-0.0297582	-0.0719396
15.2	0.0290437	0.107957	-0.0347592	-0.0674379
15.3	0.0314463	0.103484	-0.0314897	-0.0645221
15.4	0.0311456	0.103838	-0.0303129	-0.0762593
15.5	0.0261106	0.101357	-0.0247685	-0.0788901
15.6	0.0252442	0.0991397	-0.0355536	-0.077709
15.7	0.0245614	0.10156	-0.0276165	-0.0816898
15.8	0.0294384	0.0986465	-0.028795	-0.0818989
15.9	0.0253892	0.0968903	-0.0266151	-0.0760965
16	0.0249391	0.0919023	-0.0303389	-0.0831857
16.1	0.0181923	0.0899695	-0.0316168	-0.0752529
16.2	0.0146476	0.090135	-0.0261042	-0.0771369
16.3	0.0171452	0.0922859	-0.0298681	-0.0720376
16.4	0.0150486	0.0910841	-0.0375625	-0.0802868
16.5	0.0182032	0.0867714	-0.0394779	-0.0834267
16.6	0.0178558	0.0885589	-0.0398707	-0.0779076
16.7	0.0199833	0.0807827	-0.0424368	-0.0772866
16.8	0.0110849	0.0863263	-0.0342598	-0.0743809
16.9	0.0130179	0.0880169	-0.0428721	-0.0775083
17	0.0121775	0.0839031	-0.030608	-0.0833832
17.1	0.00984301	0.0841053	-0.0344587	-0.077842
17.2	0.00563039	0.0816273	-0.0373752	-0.0783723
17.3	0.00916154	0.0793425	-0.0299841	-0.0773087
17.4	0.00668589	0.0839943	-0.0367174	-0.0741767
17.5	0.00775343	0.0797178	-0.0242175	-0.0746402
17.6	0.00694975	0.0797408	-0.0388073	-0.0879807
17.7	0.0110762	0.0799973	-0.0243534	-0.0881584
17.8	0.0119016	0.0744403	-0.0313841	-0.0841991
17.9	0.0151087	0.0738655	-0.0418451	-0.0877451
18	0.0098133	0.0749247	-0.0404564	-0.0885402
18.1	0.0104387	0.0761901	-0.0405548	-0.0837947
18.2	0.00581582	0.0715585	-0.0440117	-0.0820932
18.3	0.00501804	0.0720373	-0.039659	-0.0812932
18.4	0.00895808	0.0756154	-0.0388292	-0.0838274
18.5	0.00325985	0.0741434	-0.0338696	-0.0884659
18.6	0.00290514	0.0702366	-0.0340829	-0.0918352
18.7	0.00762063	0.0719889	-0.0328501	-0.0870924
18.8	0.0137163	0.0714748	-0.037592	-0.0920025
18.9	0.0141563	0.0701019	-0.0414	-0.0706089
19	0.0141431	0.0678503	-0.0539366	-0.0798945
19.1	0.01341	0.0677082	-0.0334258	-0.0897911
19.2	0.012906	0.0672829	-0.0477088	-0.0750735
19.3	0.0122566	0.0675865	-0.0496111	-0.0756691
19.4	0.0101628	0.067516	-0.0427593	-0.0792511
19.5	0.0152348	0.0642399	-0.0399125	-0.0882805
19.6	0.00657512	0.0637841	-0.0390083	-0.0938678
19.7	0.010498	0.0652159	-0.044973	-0.0969683
19.8	0.00449275	0.0596688	-0.0401854	-0.0844619
19.9	0.0093899	0.0591568	-0.0401572	-0.0817506
20	0.00681362	0.0602318	-0.0436238	-0.100308
20.1	0.000992717	0.0575106	-0.048443	-0.0956598
20.2	0.00405237	0.0573347	-0.044471	-0.102259
20.3	0.00549081	0.060792	-0.0468052	-0.0974304
20.4	0.00739899	0.0544939	-0.0461474	-0.0978812
20.5	0.00393964	0.0507492	-0.0621667	-0.107708
20.6	0.000616621	0.0487521	-0.0490603	-0.101783
20.7	0.00466571	0.054918	-0.0560997	-0.107315
20.8	0.00721991	0.0577965	-0.0547298	-0.103816
20.9	0.00246358	0.0518693	-0.0504508	-0.0986996
21	0.00999878	0.0532328	-0.054709	-0.102019
21.1	0.00567342	0.0528108	-0.0537154	-0.100105
21.2	0.00723828	0.0576582	-0.0546117	-0.100567
21.3	0.00261125	0.0543184	-0.0578322	-0.0937824
21.4	0.00220591	0.0523381	-0.0570497	-0.0906267
21.5	0.00304798	0.0524359	-0.0701571	-0.0987278
21.6	0.00810814	0.0537024	-0.0673969	-0.0905849
21.7	0.00296515	0.0498234	-0.0615265	-0.0983492
21.8	0.00430557	0.0533761	-0.0812403	-0.103947
21.9	0.0106835	0.0495186	-0.0681291	-0.0921704
22	0.00620783	0.0503515	-0.0743222	-0.0945923
22.1	0.0104139	0.050701	-0.0870078	-0.105074
22.2	0.00386998	0.0472299	-0.0739715	-0.0978729
22.3	0.0100156	0.0472982	-0.0884121	-0.10725
22.4	0.0102278	0.0455367	-0.0732664	-0.106951
22.5	0.00594525	0.047999	-0.0744079	-0.104852
22.6	0.0105631	0.0492981	-0.0732677	-0.0898181
22.7	0.00659113	0.0489373	-0.077623	-0.0932901
22.8	0.0107589	0.0445301	-0.0721934	-0.0971655
22.9	0.00695855	0.0469958	-0.0769186	-0.102546
23	0.00611354	0.0463388	-0.0727185	-0.0938715
23.1	0.00663447	0.0465251	-0.0709155	-0.0864179
23.2	0.00654633	0.0468934	-0.0693322	-0.0867445
23.3	0.00966081	0.045163	-0.0661019	-0.0939343
23.4	0.00448627	0.0471769	-0.0684458	-0.099378
23.5	0.00513494	0.0462881	-0.0865892	-0.0883462
23.6	0.007936	0.0424467	-0.0706125	-0.0891497
23.7	0.00942853	0.0426765	-0.0707594	-0.0850961
23.8	0.00882748	0.0419401	-0.0725066	-0.0895945
23.9	0.00540505	0.0407018	-0.0752058	-0.0884493
24	0.0100735	0.039928	-0.0757588	-0.0880261
24.1	0.00749584	0.0361788	-0.0743823	-0.0781099
24.2	0.00763759	0.0351142	-0.0772186	-0.0956335
24.3	0.00845314	0.0339574	-0.0770888	-0.0820087
24.4	0.00354202	0.031406	-0.0752105	-0.0837714
24.5	0.00276581	0.0386867	-0.0780151	-0.0938142
24.6	0.00840016	0.0292513	-0.0883539	-0.0924707
24.7	0.00318923	0.0343164	-0.0789843	-0.10752
24.8	0.00228703	0.0355153	-0.0762382	-0.105379
24.9	0.0032876	0.0333564	-0.0840324	-0.0987731
25	0.00746789	0.0229187	-0.0795231	-0.094725
25.1	0.00182398	0.0293213	-0.0904296	-0.0892449
25.2	0.00495961	0.0233678	-0.0804398	-0.0891563
25.3	0.00082569	0.0287994	-0.0796095	-0.0960507
25.4	0.0034637	0.0212224	-0.0916327	-0.108514
25.5	0.00128257	0.0243682	-0.0817428	-0.109916
25.6	0.00130032	0.0247816	-0.0838504	-0.1184
25.7	0.00257115	0.0276023	-0.088113	-0.0975287
25.8	0.00272142	0.0280782	-0.0859959	-0.114857
25.9	-0.000154878	0.0166731	-0.0857646	-0.113946
26	0.00353968	0.0191356	-0.0910487	-0.11513
26.1	0.0029988	0.023883	-0.0977769	-0.118218
26.2	0.00738196	0.0203935	-0.0891386	-0.118148
26.3	0.00748526	0.0233851	-0.0834723	-0.109551
26.4	0.00716096	0.0237766	-0.0853514	-0.110654
26.5	0.00386382	0.0185257	-0.0934896	-0.118011
26.6	0.00642279	0.0192601	-0.0806933	-0.110212
26.7	0.00586379	0.0242291	-0.103377	-0.117048
26.8	-0.00313423	0.0210567	-0.0868629	-0.110456
26.9	-0.00311157	0.0160743	-0.0935135	-0.102916
27	-0.00527314	0.0217999	-0.0886846	-0.115261
27.1	0.000136511	0.0176371	-0.0863094	-0.11249
27.2	-0.00968688	0.0188978	-0.0930366	-0.112919
27.3	-0.00135837	0.0200007	-0.0999511	-0.122892
27.4	-0.00158162	0.0182566	-0.0929419	-0.111397
27.5	-0.00746414	0.0142336	-0.0929715	-0.11771
27.6	-0.00789654	0.0150572	-0.0958471	-0.117442
27.7	-0.0134834	0.0196785	-0.0885895	-0.128065
27.8	-0.00419975	0.0181786	-0.0833583	-0.128154
27.9	-0.00920679	0.0147474	-0.0904117	-0.130502
28	-0.0147515	0.0179758	-0.0909423	-0.123765
28.1	-0.00605135	0.0216667	-0.0905168	-0.122805
28.2	-0.0105031	0.0181009	-0.0850889	-0.116443
28.3	-0.00780391	0.0218026	-0.0845274	-0.108807
28.4	-0.0157643	0.0214003	-0.085619	-0.119979
28.5	-0.0111091	0.0196486	-0.0845227	-0.115431
28.6	-0.0117315	0.019889	-0.0852937	-0.104913
28.7	-0.0160423	0.0194159	-0.0982817	-0.103038
28.8	-0.0118192	0.023681	-0.0871197	-0.107936
28.9	-0.0115873	0.0229887	-0.10637	-0.0868127
29	-0.0208838	0.0187866	-0.10989	-0.103529
29.1	-0.0164419	0.0184305	-0.0903055	-0.0934994
29.2	-0.0168706	0.0183817	-0.0880105	-0.10113
29.3	-0.0122218	0.0205302	-0.0842737	-0.0941477
29.4	-0.00989382	0.0208162	-0.0908504	-0.0795082
29.5	-0.0108324	0.0221639	-0.0877516	-0.073767
29.6	-0.0169923	0.023274	-0.0911678	-0.0751481
29.7	-0.00916151	0.0271325	-0.0913745	-0.0563478
29.8	-0.0171639	0.0252339	-0.0927315	-0.0352689
29.9	-0.0153055	0.0261309	-0.0858967	-0.0356263
30	-0.0189659	0.0320171	-0.0882805	-0.0158031

## Sheet: Panel B
Time (sec)	dF/F
0	0.00788749
0.1	0.00808692
0.2	0.00778506
0.3	0.00774869
0.4	0.00785718
0.5	0.00762435
0.6	0.00700953
0.7	0.00754989
0.8	0.00754701
0.9	0.00746951
1	0.00749103
1.1	0.00755832
1.2	0.00769631
1.3	0.00752895
1.4	0.00764858
1.5	0.00759118
1.6	0.00752037
1.7	0.0077109
1.8	0.00747177
1.9	0.00743573
2	0.00835468
2.1	0.00828777
2.2	0.00855097
2.3	0.00840443
2.4	0.00888571
2.5	0.00802148
2.6	0.008008
2.7	0.00819249
2.8	0.00811804
2.9	0.00818867
3	0.00775711
3.1	0.00788356
3.2	0.00773735
3.3	0.00775128
3.4	0.00777537
3.5	0.00809711
3.6	0.00801907
3.7	0.00798743
3.8	0.00759959
3.9	0.00795995
4	0.00822497
4.1	0.00809869
4.2	0.00828249
4.3	0.00823754
4.4	0.00862761
4.5	0.0109468
4.6	0.0201535
4.7	0.0342114
4.8	0.0472167
4.9	0.0544321
5	0.0584221
5.1	0.0577083
5.2	0.0578626
5.3	0.058879
5.4	0.0596781
5.5	0.0604639
5.6	0.0607615
5.7	0.0604726
5.8	0.0591543
5.9	0.0581577
6	0.0643989
6.1	0.0638227
6.2	0.0619178
6.3	0.0607026
6.4	0.0592806
6.5	0.0574113
6.6	0.054685
6.7	0.0524763
6.8	0.0496191
6.9	0.0473808
7	0.0459393
7.1	0.0444005
7.2	0.0430353
7.3	0.0416533
7.4	0.040539
7.5	0.0392433
7.6	0.0369777
7.7	0.0349846
7.8	0.0342623
7.9	0.0333784
8	0.0333977
8.1	0.0349788
8.2	0.0329092
8.3	0.0313597
8.4	0.0306228
8.5	0.0313466
8.6	0.0363822
8.7	0.0431048
8.8	0.0482732
8.9	0.0520644
9	0.0531955
9.1	0.0546346
9.2	0.0533469
9.3	0.0553809
9.4	0.0563348
9.5	0.0571525
9.6	0.0577732
9.7	0.0571305
9.8	0.056325
9.9	0.0559936
10	0.0553865
10.1	0.0543834
10.2	0.0515495
10.3	0.0496328
10.4	0.0476042
10.5	0.046582
10.6	0.0448954
10.7	0.04332
10.8	0.0415637
10.9	0.040203
11	0.0387479
11.1	0.0375653
11.2	0.0359763
11.3	0.0348729
11.4	0.0334675
11.5	0.0313609
11.6	0.0304235
11.7	0.0297601
11.8	0.0291445
11.9	0.0288239
12	0.0272818
12.1	0.0277925
12.2	0.0264522
12.3	0.0258164
12.4	0.0254855
12.5	0.0260073
12.6	0.0305399
12.7	0.0376504
12.8	0.0449459
12.9	0.0485734
13	0.0502044
13.1	0.0504909
13.2	0.0512901
13.3	0.0526338
13.4	0.0535304
13.5	0.0534438
13.6	0.0536538
13.7	0.0536886
13.8	0.0536096
13.9	0.05239
14	0.0483193
14.1	0.0457654
14.2	0.0457121
14.3	0.0456934
14.4	0.0437274
14.5	0.0423446
14.6	0.0406445
14.7	0.0385214
14.8	0.0382454
14.9	0.0371393
15	0.0350009
15.1	0.0342169
15.2	0.0325864
15.3	0.0317964
15.4	0.0306246
15.5	0.0295466
15.6	0.0276927
15.7	0.0278149
15.8	0.0268584
15.9	0.0260574
16	0.0244957
16.1	0.0239899
16.2	0.0236387
16.3	0.0232526
16.4	0.0220498
16.5	0.0238076
16.6	0.0267707
16.7	0.0321365
16.8	0.0382943
16.9	0.0422723
17	0.0442814
17.1	0.0448883
17.2	0.0455308
17.3	0.0465694
17.4	0.0470745
17.5	0.04809
17.6	0.0484907
17.7	0.0483285
17.8	0.0479525
17.9	0.0478141
18	0.0474091
18.1	0.0471257
18.2	0.0441811
18.3	0.0435572
18.4	0.0421755
18.5	0.0407936
18.6	0.0390034
18.7	0.037309
18.8	0.0360797
18.9	0.0346641
19	0.0339153
19.1	0.032597
19.2	0.0317306
19.3	0.0303843
19.4	0.0294443
19.5	0.0291047
19.6	0.0283049
19.7	0.0274218
19.8	0.025874
19.9	0.0255735
20	0.02406
20.1	0.0245927
20.2	0.0238673
20.3	0.0231063
20.4	0.0224617
20.5	0.0231399
20.6	0.0276724
20.7	0.0332288
20.8	0.0387541
20.9	0.0418441
21	0.0439233
21.1	0.0439741
21.2	0.0446873
21.3	0.0452812
21.4	0.0457444
21.5	0.046234
21.6	0.0465567
21.7	0.0449829
21.8	0.0451096
21.9	0.0447651
22	0.0433613
22.1	0.0422577
22.2	0.0416196
22.3	0.0404557
22.4	0.0388783
22.5	0.0376237
22.6	0.0358219
22.7	0.0342818
22.8	0.0319612
22.9	0.0304188
23	0.0303363
23.1	0.0302689
23.2	0.0290175
23.3	0.0277493
23.4	0.0268491
23.5	0.0260433
23.6	0.02507
23.7	0.0235806
23.8	0.0235051
23.9	0.0220099
24	0.0211137
24.1	0.0201596
24.2	0.0197228
24.3	0.019174
24.4	0.018661
24.5	0.0189396
24.6	0.0225648
24.7	0.0275617
24.8	0.0320174
24.9	0.0347841
25	0.0363304
25.1	0.0379043
25.2	0.0388813
25.3	0.0390468
25.4	0.0391138
25.5	0.0396585
25.6	0.0403857
25.7	0.0408428
25.8	0.040201
25.9	0.0396889
26	0.0383044
26.1	0.0369604
26.2	0.0357434
26.3	0.0347368
26.4	0.0331798
26.5	0.0325667
26.6	0.0313979
26.7	0.0304142
26.8	0.0295072
26.9	0.028307
27	0.0273711
27.1	0.0269369
27.2	0.0264741
27.3	0.0251574
27.4	0.025027
27.5	0.0243771
27.6	0.0240623
27.7	0.0232076
27.8	0.0229125
27.9	0.0222112
28	0.0207179
28.1	0.0204003
28.2	0.020314
28.3	0.0193151
28.4	0.0187601
28.5	0.0196882
28.6	0.0227451
28.7	0.0282884
28.8	0.0334814
28.9	0.0358512
29	0.0365559
29.1	0.037202
29.2	0.0381262
29.3	0.0387089
29.4	0.0391784
29.5	0.0392818
29.6	0.039253
29.7	0.0386324
29.8	0.0379158
29.9	0.0373203
30	0.0354484
30.1	0.0338043
30.2	0.033093
30.3	0.0317394
30.4	0.0312293
30.5	0.0297587
30.6	0.0284929
30.7	0.0278662
30.8	0.0268502
30.9	0.026377
31	0.0255151
31.1	0.0246752
31.2	0.0239246
31.3	0.0235096
31.4	0.0228795
31.5	0.0223155
31.6	0.0219569
31.7	0.0215712
31.8	0.020862
31.9	0.0203653
32	0.0191575
32.1	0.0185063
32.2	0.0177147
32.3	0.0178398
32.4	0.017595
32.5	0.0182295
32.6	0.0200991
32.7	0.0250049
32.8	0.0299185
32.9	0.0334518
33	0.0348392
33.1	0.0353932
33.2	0.035386
33.3	0.0356792
33.4	0.0362214
33.5	0.0369657
33.6	0.036866
33.7	0.036898
33.8	0.0352501
33.9	0.0353745
34	0.0338221
34.1	0.0324732
34.2	0.0320807
34.3	0.0312359
34.4	0.0295221
34.5	0.0283061
34.6	0.0276611
34.7	0.0269013
34.8	0.0258626
34.9	0.0254311
35	0.0250238
35.1	0.0242415
35.2	0.0231148
35.3	0.0227837
35.4	0.0220864
35.5	0.0219504
35.6	0.0206724
35.7	0.0199787
35.8	0.0191244
35.9	0.0180593
36	0.0177168
36.1	0.0174524
36.2	0.0168872
36.3	0.01696
36.4	0.0167839
36.5	0.0176091
36.6	0.0206459
36.7	0.02545
36.8	0.0301366
36.9	0.0317933
37	0.0326819
37.1	0.0336454
37.2	0.0343154
37.3	0.034815
37.4	0.0341107
37.5	0.0347216
37.6	0.034299
37.7	0.033852
37.8	0.0333814
37.9	0.0333848
38	0.0316043
38.1	0.03044
38.2	0.0296769
38.3	0.0290758
38.4	0.0273393
38.5	0.0276042
38.6	0.0255478
38.7	0.0253355
38.8	0.0246558
38.9	0.0238756
39	0.0234715
39.1	0.0230441
39.2	0.0219877
39.3	0.0216698
39.4	0.0209836
39.5	0.0209984
39.6	0.0208006
39.7	0.020241
39.8	0.0194367
39.9	0.0184495
40	0.0171183
40.1	0.0169653
40.2	0.0166972
40.3	0.0167787
40.4	0.0159622
40.5	0.0166462
40.6	0.0188458
40.7	0.0230305
40.8	0.0276284
40.9	0.0305192
41	0.0323925
41.1	0.0336404
41.2	0.0339396
41.3	0.0339912
41.4	0.0340522
41.5	0.0335552
41.6	0.0332169
41.7	0.032834
41.8	0.0324287
41.9	0.0321907
42	0.0295973
42.1	0.0293109
42.2	0.0278984
42.3	0.0269495
42.4	0.0243974
42.5	0.0237748
42.6	0.0230763
42.7	0.0223814
42.8	0.0217512
42.9	0.02195
43	0.021757
43.1	0.02202
43.2	0.0211596
43.3	0.0205394
43.4	0.0202573
43.5	0.0197022
43.6	0.0193951
43.7	0.0194398
43.8	0.0182453
43.9	0.0176869
44	0.0162018
44.1	0.0168257
44.2	0.0159573
44.3	0.0156877
44.4	0.0156514
44.5	0.0159193
44.6	0.0174365
44.7	0.0216798
44.8	0.025762
44.9	0.0292941
45	0.0305569
45.1	0.0316731
45.2	0.0319114
45.3	0.0313156
45.4	0.0334493
45.5	0.0332625
45.6	0.0334546
45.7	0.0326882
45.8	0.0324354
45.9	0.0309617
46	0.0290686
46.1	0.0275454
46.2	0.026633
46.3	0.0259584
46.4	0.0245167
46.5	0.0241318
46.6	0.0232473
46.7	0.0226667
46.8	0.0214231
46.9	0.0213221
47	0.0204937
47.1	0.0199111
47.2	0.0193525
47.3	0.0191379
47.4	0.0189634
47.5	0.0176959
47.6	0.0176629
47.7	0.0172957
47.8	0.0164334
47.9	0.015903
48	0.0147218
48.1	0.0149071
48.2	0.0144291
48.3	0.0149127
48.4	0.0139614
48.5	0.0138111
48.6	0.0164356
48.7	0.0205934
48.8	0.0243815
48.9	0.0268491
49	0.0285666
49.1	0.0293083
49.2	0.029676
49.3	0.0306457
49.4	0.0300513
49.5	0.0301536
49.6	0.0291528
49.7	0.0280295
49.8	0.0270397
49.9	0.0267513
50	0.0251654
50.1	0.023311
50.2	0.0233297
50.3	0.0216113
50.4	0.0219694
50.5	0.0202721
50.6	0.0192969
50.7	0.0186629
50.8	0.0186287
50.9	0.0181763
51	0.0181721
51.1	0.0177921
51.2	0.0170451
51.3	0.0169118
51.4	0.0167473
51.5	0.0162181
51.6	0.0164136
51.7	0.0159347
51.8	0.0155738
51.9	0.0159736
52	0.014949
52.1	0.014875
52.2	0.014774
52.3	0.0144275
52.4	0.0146153
52.5	0.014625
52.6	0.0158683
52.7	0.019024
52.8	0.0230143
52.9	0.0263641
53	0.0285318
53.1	0.0289705
53.2	0.0290826
53.3	0.029703
53.4	0.0304004
53.5	0.0299849
53.6	0.0293357
53.7	0.029117
53.8	0.0276248
53.9	0.0275762
54	0.0252318
54.1	0.0242347
54.2	0.0226806
54.3	0.0221854
54.4	0.0212986
54.5	0.0209477
54.6	0.0198747
54.7	0.0188518
54.8	0.0182316
54.9	0.0178514
55	0.0178279
55.1	0.0171499
55.2	0.0164545
55.3	0.0164405
55.4	0.0160294
55.5	0.0161428
55.6	0.0155498
55.7	0.0152221
55.8	0.014745
55.9	0.0140769
56	0.0131093
56.1	0.012956
56.2	0.012693
56.3	0.0128442
56.4	0.0131413
56.5	0.0127984
56.6	0.0150496
56.7	0.0177526
56.8	0.0223956
56.9	0.0257664
57	0.0283082
57.1	0.0304378
57.2	0.0311624
57.3	0.0314474
57.4	0.0313279
57.5	0.0311651
57.6	0.0305553
57.7	0.030168
57.8	0.0300599
57.9	0.0290122
58	0.0270831
58.1	0.0261392
58.2	0.0249294
58.3	0.0237501
58.4	0.0227896
58.5	0.0215194
58.6	0.0213426
58.7	0.0204895
58.8	0.019842
58.9	0.0188802
59	0.0191048
59.1	0.0186676
59.2	0.0179699
59.3	0.0174403
59.4	0.0178376
59.5	0.0169209
59.6	0.0165649
59.7	0.0170636
59.8	0.0164839
59.9	0.0158226
60	0.0143367
60.1	0.0146866
60.2	0.0141532
60.3	0.014328
60.4	0.0147369
60.5	0.0151157
60.6	0.01754
60.7	0.0221655
60.8	0.0256284
60.9	0.0281917
61	0.0291555
61.1	0.0293729
61.2	0.030147
61.3	0.0301328
61.4	0.0302938
61.5	0.0303584
61.6	0.0302427
61.7	0.0300109
61.8	0.030127
61.9	0.0302668
62	0.0286178
62.1	0.0283836
62.2	0.0271907
62.3	0.0257385
62.4	0.0257288
62.5	0.0245217
62.6	0.0231424
62.7	0.0226417
62.8	0.0218025
62.9	0.0207093
63	0.0200254
63.1	0.0199547
63.2	0.0190568
63.3	0.0187743
63.4	0.0182955
63.5	0.0173661
63.6	0.0172272
63.7	0.017073
63.8	0.0161585
63.9	0.015807
64	0.0146605
64.1	0.0142634
64.2	0.0143226
64.3	0.0138175
64.4	0.0138542
64.5	0.0143702
64.6	0.0173877
64.7	0.0217469
64.8	0.0250804
64.9	0.0267514
65	0.0278236
65.1	0.0274022
65.2	0.0272797
65.3	0.0277097
65.4	0.0281593
65.5	0.0278516
65.6	0.0275533
65.7	0.0276219
65.8	0.0280699
65.9	0.027429
66	0.0257985
66.1	0.0251153
66.2	0.0240344
66.3	0.0229462
66.4	0.0224339
66.5	0.0213389
66.6	0.0208652
66.7	0.0202963
66.8	0.0199217
66.9	0.0194231
67	0.0181234
67.1	0.0182055
67.2	0.0171644
67.3	0.0169981
67.4	0.0167904
67.5	0.0164711
67.6	0.0158282
67.7	0.0154747
67.8	0.0146272
67.9	0.0142379
68	0.0129133
68.1	0.0129017
68.2	0.0131798
68.3	0.0133857
68.4	0.012632
68.5	0.0136716
68.6	0.0160257
68.7	0.0188641
68.8	0.0223686
68.9	0.0257949
69	0.0266076
69.1	0.027928
69.2	0.0276439
69.3	0.0276163
69.4	0.0275666
69.5	0.0273377
69.6	0.0266598
69.7	0.0268433
69.8	0.026631
69.9	0.0257628
70	0.0237761
70.1	0.0232504
70.2	0.0224874
70.3	0.0210766
70.4	0.0205952
70.5	0.0191506
70.6	0.0193948
70.7	0.0171362
70.8	0.0173579
70.9	0.0170423
71	0.0162497
71.1	0.0160938
71.2	0.0159141
71.3	0.0152586
71.4	0.015208
71.5	0.0149543
71.6	0.0149722
71.7	0.0145965
71.8	0.0141876
71.9	0.0137331
72	0.0138031
72.1	0.0141921
72.2	0.0139648
72.3	0.0156489
72.4	0.0191091
72.5	0.0227677
72.6	0.0250693
72.7	0.0261549
72.8	0.0266267
72.9	0.0272757
73	0.0284315
73.1	0.028119
73.2	0.028961
73.3	0.0283799
73.4	0.0282109
73.5	0.0271338
73.6	0.0268786
73.7	0.0243205
73.8	0.0233402
73.9	0.0224506
74	0.02188
74.1	0.0212579
74.2	0.0202419
74.3	0.0204983
74.4	0.0192908
74.5	0.0196665
74.6	0.0191516
74.7	0.0172734
74.8	0.0177589
74.9	0.016733
75	0.0165326
75.1	0.0162271
75.2	0.0158654
75.3	0.0154505
75.4	0.0155032
75.5	0.0153749
75.6	0.0150924
75.7	0.0140864
75.8	0.0144708
75.9	0.014573
76	0.0140992
76.1	0.0141335
76.2	0.0146843
76.3	0.0166429
76.4	0.0205037
76.5	0.025069
76.6	0.0285849
76.7	0.0300528
76.8	0.0308845
76.9	0.030857
77	0.0312402
77.1	0.0323222
77.2	0.0318697
77.3	0.0314012
77.4	0.0308412
77.5	0.0307979
77.6	0.0301632
77.7	0.0286972
77.8	0.0280755
77.9	0.0267908
78	0.0262189
78.1	0.0250801
78.2	0.0242333
78.3	0.0227691
78.4	0.0227111
78.5	0.0215856
78.6	0.0208186
78.7	0.0199626
78.8	0.0194839
78.9	0.0196712
79	0.0189337
79.1	0.0184029
79.2	0.0174648
79.3	0.0177914
79.4	0.0169965
79.5	0.0164263
79.6	0.0163159
79.7	0.0153696
79.8	0.0149601
79.9	0.0152165
80	0.0149606
80.1	0.0150815
80.2	0.015714
80.3	0.0189005
80.4	0.0227486
80.5	0.0269758
80.6	0.0294113
80.7	0.0302286
80.8	0.0313805
80.9	0.0312727
81	0.0309401
81.1	0.0314457
81.2	0.0312699
81.3	0.0308434
81.4	0.0304604
81.5	0.0305008
81.6	0.0298505
81.7	0.0291111
81.8	0.028115
81.9	0.0268777
82	0.0260962
82.1	0.0244384
82.2	0.0242584
82.3	0.0236338
82.4	0.0221918
82.5	0.0217967
82.6	0.0212446
82.7	0.0203544
82.8	0.0197522
82.9	0.0194178
83	0.0188551
83.1	0.0182152
83.2	0.0182128
83.3	0.0175334
83.4	0.017569
83.5	0.0170024
83.6	0.0167992
83.7	0.0161275
83.8	0.0157188
83.9	0.0155746
84	0.0152275
84.1	0.015789
84.2	0.0149939
84.3	0.0173308
84.4	0.0204177
84.5	0.0251673
84.6	0.0282996
84.7	0.0304214
84.8	0.0310669
84.9	0.031
85	0.0324063
85.1	0.031827
85.2	0.0318222
85.3	0.0307859
85.4	0.0313402
85.5	0.0309038
85.6	0.0300921
85.7	0.0278759
85.8	0.0272386
85.9	0.0258494
86	0.0253247
86.1	0.0245858
86.2	0.0236653
86.3	0.0227021
86.4	0.0223223
86.5	0.0221007
86.6	0.0215324
86.7	0.0210357
86.8	0.0206147
86.9	0.019661
87	0.0194637
87.1	0.0193166
87.2	0.0181354
87.3	0.0183261
87.4	0.0179999
87.5	0.0173049
87.6	0.0172788
87.7	0.0161415
87.8	0.015803
87.9	0.0156255
88	0.0148387
88.1	0.0150015
88.2	0.0152117
88.3	0.0162817
88.4	0.0200886
88.5	0.0240945
88.6	0.0261439
88.7	0.0273219
88.8	0.0287751
88.9	0.0289424
89	0.0286473
89.1	0.0288878
89.2	0.0284081
89.3	0.0279731
89.4	0.0281674
89.5	0.0282008
89.6	0.027672
89.7	0.0265181
89.8	0.0256612

## Sheet: Panel C
A dF Trained	Utility Trained	A df Untrained	Utility Untrained	CI A dF Trained	CI A dF Untrained
0.101	0.005055	0.219	0.003315	0.120817	0.0685741
0.37	0.0469	0.235	0.0467	0.0882241	0.100266
0.774	0.059	0.484	0.0439	0.126589	0.169662
0.839	0.715	0.53	0.543	0.110049	0.212816
1.035	0.697	0.349	0.6	0.300432	0.103446
0.403	2.25	0.343	2.073	0.140254	0.101679
0.509	0.798	0.282	0.721	0.117606	0.0701269

## Sheet: Panel D
A dF Trained	Preference Trained	A df Untrained	Preference Untrained	CI A dF Trained	CI A dF Untrained
0.101	0.005055	0.219	0.003315	0.120817	0.0685741
0.37	0.0469	0.235	0.0467	0.0882241	0.100266
0.774	0.059	0.484	0.0439	0.126589	0.169662
0.839	0.715	0.53	0.543	0.110049	0.212816
1.035	0.697	0.349	0.6	0.300432	0.103446
0.403	2.25	0.343	2.073	0.140254	0.101679
0.509	0.798	0.282	0.721	0.117606	0.0701269

## Sheet: Panel E
Log price ratio	A dF Trained	A dF Untrained	CI A dF Trained	CI A dF Untrained
-2.30103	0.101	0.219	0.120817	0.0685741
-1.47712	0.37	0.235	0.0882241	0.100266
-1	0.774	0.484	0.126589	0.169662
-0.477121	0.839	0.53	0.110049	0.212816
0	1.035	0.349	0.300432	0.103446
0.477121	0.403	0.343	0.140254	0.101679
1	0.509	0.282	0.117606	0.0701269
